# Supplementary material for: On the existence of low-valent magnesium–calcium complexes
Source: Royal Society of Chemistry journal article supplement (doi:10.1039/d3sc00909b), 2023-01-01
Supplement: d3sc00909b1.pdf [file d3sc00909b1.pdf]

## Supporting Information

### Table of Contents

|                                           |      |
|-------------------------------------------|------|
| 1. Spectroscopic data .....               | S2   |
| 2. Selected reactions .....               | S17  |
| 3. Crystal structure determinations ..... | S29  |
| 4. DFT calculations.....                  | S38  |
| 5. References.....                        | S100 |

# 1. Spectroscopic data



**Figure S1.**  $^1\text{H}$  NMR (400.13 MHz, 298 K,  $\text{C}_6\text{D}_6$ ) of  $[(\text{DIPePBDI})\text{CaH}\cdot(\text{THF})]_2$  (2).



**Figure S2.**  $^{13}\text{C}$  NMR (101 MHz, 298 K,  $\text{C}_6\text{D}_6$ ) of  $[(\text{DIPePBDI})\text{CaH}\cdot(\text{THF})]_2$  (2).



**Figure S3.**  $^{13}\text{C}$ (DEPT 135) NMR spectrum of  $[(\text{DIPePBDI})\text{CaH}\cdot(\text{THF})]_2$  (**2**).



**Figure S4.** 2D-HSQC NMR spectrum of  $[(\text{DIPePBDI})\text{CaH}\cdot(\text{THF})]_2$  (**2**).



**Figure S5.** 2D-HMBC NMR spectrum of  $[(\text{DIPePBDI})\text{CaH}\cdot(\text{THF})]_2$  (**2**).



**Figure S6.**  $^1\text{H}$  NMR (400.13 MHz, 298 K,  $\text{C}_6\text{D}_6$ ) of  $(\text{DIPePBDI}^*)\text{Mg}(\mu^2, \mu^4\text{-naphthalene})\text{Ca}(\text{DIPePBDI})$  (**4**).



**Figure S7.**  $^{13}\text{C}$  NMR (100 MHz, 298 K,  $\text{C}_6\text{D}_6$ ) of  $(^{\text{DIPeP}}\text{BDI}^*)\text{Mg}(\mu^2, \mu^4\text{-naphthalene})\text{Ca}(^{\text{DIPeP}}\text{BDI})$  (**4**).



**Figure S8.** 2D-COSY NMR spectrum (400 MHz, 298 K,  $\text{C}_6\text{D}_6$ ) of  $(^{\text{DIPeP}}\text{BDI}^*)\text{Mg}(\mu^2, \mu^4\text{-naphthalene})\text{Ca}(^{\text{DIPeP}}\text{BDI})$  (**4**).



**Figure S9.**  $^{13}\text{C}$ (DEPT 135) NMR spectrum of  $(^{\text{DIPeP}}\text{BDI}^*)\text{Mg}(\mu^2, \mu^A\text{-naphthalene})\text{Ca}(^{\text{DIPeP}}\text{BDI})$  (**4**).



**Figure S10.** 2D-HSQC NMR spectrum of  $(^{\text{DIPeP}}\text{BDI}^*)\text{Mg}(\mu^2, \mu^A\text{-naphthalene})\text{Ca}(^{\text{DIPeP}}\text{BDI})$  (**4**).



**Figure S11.** 2D-HMBC NMR spectrum of  $(\text{DIPePBDI}^*)\text{Mg}(\mu^2, \mu^4\text{-naphthalene})\text{Ca}(\text{DIPePBDI})$  (**4**).



**Figure S12.**  $^1\text{H}$  NMR (600.13 MHz, 298 K,  $\text{C}_6\text{D}_6$ ) of  $(\text{DIPePBDI}^*)\text{Mg}(\mu^2, \mu^4\text{-anthracene})\text{Ca}(\text{DIPePBDI})$  (**5**). Signal marked with an asterisk are residue of toluene.



**Figure S13.**  $^{13}\text{C}$  NMR (151.13 MHz, 298 K,  $\text{C}_6\text{D}_6$ ) of  $(^{\text{DIPePBdi}}\text{Bdi}^*)\text{Mg}(\mu^2, \mu^A\text{-anthracene})\text{Ca}(\text{DIPePBdi})$  (**5**). Signals marked with an asterisk are residue of toluene.



**Figure S14.** 2D-COSY NMR spectrum (600 MHz, 298 K,  $\text{C}_6\text{D}_6$ ) of  $(^{\text{DIPePBdi}}\text{Bdi}^*)\text{Mg}(\mu^2, \mu^A\text{-anthracene})\text{Ca}(\text{DIPePBdi})$  (**5**).





**Figure S15.**  $^{13}\text{C}$ (DEPT 135) NMR spectrum of  $(\text{DIPePBDI}^*)\text{Mg}(\mu^2, \mu^A\text{-anthracene})\text{Ca}(\text{DIPePBDI})$  (**5**).



**Figure S16.** 2D-HSQC NMR spectrum  $(\text{DIPePBDI}^*)\text{Mg}(\mu^2, \mu^A\text{-anthracene})\text{Ca}(\text{DIPePBDI})$  (**5**).



Figure S17. 2D-HMBC NMR spectrum (<sup>DIPePBDI\*</sup>)Mg( $\mu^2, \mu^4$ -anthracene)Ca(<sup>DIPePBDI</sup>) (5).



Figure S18. <sup>1</sup>H NMR (600.13 MHz, 298 K, C<sub>6</sub>D<sub>6</sub>) of (<sup>DIPePBDI</sup>)Ca( $\mu^6, \mu^6$ -naphthalene)Ca(<sup>DIPePBDI</sup>) (6).



**Figure S19.**  $^{13}\text{C}$  NMR (151.13 MHz, 298 K,  $\text{C}_6\text{D}_6$ ) of  $(\text{DIPePBdi})\text{Ca}(\mu^A, \mu^A\text{-naphthalene})\text{Ca}(\text{DIPePBdi})$  (6).



**Figure S20.** 2D-COSY NMR spectrum (600 MHz, 298 K,  $\text{C}_6\text{D}_6$ ) of  $(\text{DIPePBdi})\text{Ca}(\mu^A, \mu^A\text{-naphthalene})\text{Ca}(\text{DIPePBdi})$  (6).



**Figure S21.**  $^{13}\text{C}$ (DEPT 135) NMR spectrum of  $(^{\text{DIPeP}}\text{BDI})\text{Ca}(\mu^A, \mu^A\text{-naphthalene})\text{Ca}(^{\text{DIPeP}}\text{BDI})$  (**6**).



**Figure S22.** 2D-HSQC NMR spectrum  $(^{\text{DIPeP}}\text{BDI})\text{Ca}(\mu^A, \mu^A\text{-naphthalene})\text{Ca}(^{\text{DIPeP}}\text{BDI})$  (**6**).



**Figure S23.** 2D-HMBC NMR spectrum ( $^{DIPePBdi}Ca(\mu^A, \mu^A\text{-naphthalene})Ca^{DIPePBdi}$ ) (**6**).



**Figure S24.**  $^1H$  NMR (600.13 MHz, 298 K,  $C_6D_6$ ) of ( $^{DIPePBdi}Ca(\mu^\beta, \mu^\beta\text{-anthracene})Ca^{DIPePBdi}$ ) (**7**).



**Figure S25.**  $^{13}\text{C}$  NMR (151.13 MHz, 298 K,  $\text{C}_6\text{D}_6$ ) of  $(\text{DIPePBDI})\text{Ca}(\mu^\beta, \mu^\beta\text{-anthracene})\text{Ca}(\text{DIPePBDI})$  (7).



**Figure S26.**  $^{13}\text{C}$  (DEPT 135) NMR spectrum of  $(\text{DIPePBDI})\text{Ca}(\mu^\beta, \mu^\beta\text{-anthracene})\text{Ca}(\text{DIPePBDI})$  (7).



**Figure S27.** 2D-COSY NMR spectrum (600.13 MHz, 298 K, C<sub>6</sub>D<sub>6</sub>) of (DIPePBDI)Ca( $\mu^\beta, \mu^\beta$ -anthracene)Ca(DIPePBDI) (**7**).



**Figure S28.** 2D-HSQC NMR spectrum (DIPePBDI)Ca( $\mu^\beta, \mu^\beta$ -anthracene)Ca(DIPePBDI) (**7**).



**Figure S29.** 2D-HMBC NMR spectrum ( $^{\text{DIPePBDI}}\text{Ca}(\mu^{\beta}, \mu^{\beta}\text{-anthracene})\text{Ca}^{\text{DIPePBDI}}$ ) (**7**).



## 2. Selected reactions



**Figure S30.**  $^1\text{H}$  NMR of the reaction of  $[(^{\text{DIPeP}}\text{BDI}^*)\text{Mg}^-\text{Na}^+]_2$  complex (VII) with  $[(^{\text{DIPeP}}\text{BDI})\text{Ca}]_2$  (IX) in  $\text{C}_6\text{H}_6$  after two days at room temperature. Mainly the two products  $(^{\text{DIPeP}}\text{BDI}^*)\text{MgPh}$  (X) and  $[(^{\text{DIPeP}}\text{BDI})\text{CaH}]_2$  are formed. The signal for the Ca-H is not visible. Unidentified impurities are marked with a black \*.



**Figure S31.**  $^1\text{H}$  NMR of the reaction of  $[(^{\text{D}}\text{IPePBDI}^*)\text{Mg}^-\text{Na}^+]_2$  complex (**VII**) with  $[(^{\text{D}}\text{IPePBDI})\text{Ca}]_2$  (**IX**) in  $\text{C}_6\text{D}_6$  after two days at room temperature. Mainly the two products  $(^{\text{D}}\text{IPePBDI}^*)\text{MgPh}$  (**X**) and  $[(^{\text{D}}\text{IPePBDI})\text{CaD}]_2$  are formed. The Ca-D and the Mg- $\text{C}_6\text{D}_5$  signals are not visible in the  $^1\text{H}$  NMR but can be seen in the  $^2\text{D}$  NMR spectrum (Figure S32).



**Figure S32.**  $^2\text{D}$  NMR of the reaction of  $[(^{\text{DIPeP}}\text{BDI}^*)\text{Mg}^-\text{Na}^+]_2$  complex (**VII**) with  $[(^{\text{DIPeP}}\text{BDI})\text{Ca}]_2$  (**IX**) in  $\text{C}_6\text{D}_6$  after two days at room temperature. The Ca-D and the Mg- $\text{C}_6\text{D}_5$  signals can be observed in the  $^2\text{D}$  NMR. After the reaction is finished, the solvent was removed and dried under vacuum. The resulting powder was then dissolved in hexanes and measured. Residual  $\text{C}_6\text{D}_6$  is marked with a black \*.



**Figure S33.**  $^1\text{H}$  NMR spectrum of the crude reaction of  $[(^{\text{DIPeP}}\text{BDI}^*)\text{Mg}^-\text{Na}^+]_2$  complex (**VII**) with  $[(^{\text{DIPeP}}\text{BDI})\text{Ca}]_2$  (**IX**) in the presence of naphthalene in  $\text{C}_6\text{D}_6$ . The spectrum essentially shows the pure product  $(^{\text{DIPeP}}\text{BDI}^*)\text{Mg}(\mu^2, \mu^4\text{-naphthalene})\text{Ca}(^{\text{DIPeP}}\text{BDI})$  (**4**). Residual naphthalene is marked with a \*.



**Figure S34.**  $^1\text{H}$  NMR spectrum of the crude reaction product of  $[(^{\text{DIPeP}}\text{BDI}^*)\text{Mg}^-\text{Na}^+]_2$  complex (VII) with  $[(^{\text{DIPeP}}\text{BDI})\text{Ca}]_2$  (IX) in the presence of naphthalene performed in MCH (methylcyclohexane). The NMR spectrum was recorded in  $\text{C}_6\text{D}_6$  for better comparison. For this purpose, the solvent was removed from the reaction mixture and the crude product was redissolved in  $\text{C}_6\text{D}_6$ . The spectrum essentially shows the pure product  $(^{\text{DIPeP}}\text{BDI}^*)\text{Mg}(\mu^2, \mu^4\text{-naphthalene})\text{Ca}(^{\text{DIPeP}}\text{BDI})$  (4). Residual naphthalene is marked with a \*.



**Figure S35.**  $^1\text{H}$  NMR spectrum of the crude reaction product of  $[(\text{DIPePBdi}^*)\text{Mg}^-\text{Na}^+]_2$  complex (VII) with  $[(\text{DIPePBdi})\text{Ca}]_2$  (IX) in the presence of anthracene in  $\text{C}_6\text{D}_6$ . The spectrum essentially shows the pure product  $((\text{DIPePBdi}^*)\text{Mg}(\mu^2, \mu^A\text{-anthracene})\text{Ca}(\text{DIPePBdi}))$  (5).



**Figure S36.** Crude  $^1\text{H}$  NMR spectrum of the reaction of  $[(^{\text{DIPeP}}\text{BDI}^*)\text{Mg}^-\text{Na}^+]_2$  complex (**VII**) with  $[(^{\text{DIPeP}}\text{BDI})\text{Ca}]_2$  (**IX**) in the presence of anthracene performed in MCH (methylcyclohexane). The NMR spectrum was recorded in  $\text{C}_6\text{D}_6$  for better comparison. For this purpose, the solvent was removed from the reaction mixture and the crude product was redissolved in  $\text{C}_6\text{D}_6$ . Besides the product  $((^{\text{DIPeP}}\text{BDI}^*)\text{Mg}(\mu^2, \mu^4\text{-anthracene})\text{Ca}(^{\text{DIPeP}}\text{BDI}))$  (**5**) a small amount of the homometallic  $(^{\text{DIPeP}}\text{BDI})\text{Ca}(\mu^6, \mu^6\text{-anthracene})\text{Ca}(^{\text{DIPeP}}\text{BDI})$  (**7**) is visible. Residual anthracene is marked with a \*.







**Figure S39.**  $^1\text{H}$  NMR (600.15 MHz,  $\text{C}_6\text{D}_6$ ): Decomposition of  $(\text{DIPePBDI}^*)\text{Mg}(\mu^2, \mu^4\text{-anthracene})\text{Ca}(\text{DIPePBDI})$  (**5**) after 1 day at rt.



**Figure S40.**  $^1\text{H}$  NMR (600.15 MHz,  $\text{C}_6\text{D}_6$ ): Decomposition of  $(\text{DIPePBDI}^*)\text{Mg}(\mu^2, \mu^4\text{-anthracene})\text{Ca}(\text{DIPePBDI})$  (**5**) after 16 days at rt.



**Figure S41.** Temperature dependent  $^1\text{H}$  NMR (400.15 MHz,  $\text{toluene-d}_8$ ) of  $(\text{DIPePBDI}^*)\text{Mg}(\mu^2, \mu^4\text{-anthracene})\text{Ca}(\text{DIPePBDI})$  (5). Residual anthracene is marked with a \*.



**Figure S42.**  $^1\text{H}$  NMR (400.15 MHz,  $\text{toluene-d}_8$ ) of  $(\text{DIPePBDI}^*)\text{Mg}(\mu^2, \mu^4\text{-anthracene})\text{Ca}(\text{DIPePBDI})$  (5) at -60 °C. Now five instead of previously three signals for the anthracene are visible. Signals of 3 and 4 are overlapping. Residual anthracene is marked with a \*.



**Figure S43.** Temperature dependent  $^1\text{H}$  NMR (600.15 MHz, toluene- $d_8$ ) of  $(\text{DIPePBDI})\text{Ca}(\mu^A, \mu^A\text{-naphthalene})\text{Ca}(\text{DIPePBDI})$  (**6**). This demonstrates there is exchange of the calcium atoms between the naphthalene rings.



**Figure S44.** Temperature dependent  $^1\text{H}$  NMR (600.15 MHz, toluene- $d_8$ ) of  $(\text{DIPePBDI})\text{Ca}(\mu^\beta, \mu^\beta\text{-anthracene})\text{Ca}(\text{DIPePBDI})$  (**7**). This demonstrates there is exchange of the calcium atoms between the anthracene rings.



**Figure S45.**  $^1\text{H}$  NMR (600.15 MHz,  $\text{C}_6\text{D}_6$ ) of the reaction between of  $(\text{DIPePBDI}^*)\text{MgI}$ ,  $(\text{DIPePBDI})\text{CaI}$  (XI) and naphthalene in the presence of reducing agent  $\text{KC}_8$  in  $\text{C}_6\text{D}_6$ .

### 3. Crystal structure determinations

In each case, a crystal of compound **2**, **4-7** was embedded in inert perfluoropolyalkylether (viscosity 1800 cSt; ABCR GmbH) and mounted using a Hampton Research CryoLoop. The selected crystal was then flash cooled to 100 K in a nitrogen gas stream and kept at this temperature during the experiment. The crystal structures were measured on an Agilent SuperNova diffractometer with Atlas S2 detector using a CuK $\alpha$  microfocus source. The measured data were processed with the CrysAlisPro software package.<sup>S1</sup> Using Olex2,<sup>S2</sup> the structures were solved with the ShelXT<sup>S3</sup> structure solution program using Intrinsic Phasing and refined with the ShelXL<sup>S4</sup> refinement package using Least Squares Minimization. All non-hydrogen atoms were refined anisotropically. Most hydrogen atoms were placed in ideal positions and refined as riding atoms with relative isotropic displacement parameters.

In case of compound [(<sup>DIPeP</sup>BDI)CaH·(THF)]<sub>2</sub>·2Hexane (**2**) the position of the hydride H1 was observed from difference Fourier maps and refined. Additionally, the position of H3 in the ligand backbone deviated noticeably from the idealized position and was also refined freely. The co-crystallized hexanes (an isomeric mixture was used for crystallization) were found to be disordered. One of the hexanes was clearly an *n*-hexane with two alternative orientations. This disorder was modeled with the help of similarity restraints (SADI) and rigid bond restraints (RIGU).<sup>S5</sup> The relative occupancies of the alternative orientations were refined to 0.855(6) and 0.145(6). The other solvent molecule was more severely disordered and different hexane isomers seem to be involved. A suitable disorder model for this solvent molecule could not be built. Therefore, its contribution to the structure factors was secured by back-Fourier transformation using the solvent mask routine<sup>S6,S7</sup> of the program Olex2.<sup>S2</sup> The solvent accessible voids treated this way had a size of 245.6 Å<sup>3</sup> (11.1% of the unit cell) and contained 52.4 electrons/unit cell, which is in good agreement with the 50 electrons calculated for a hexane.

Disorder was also present in case of derivative (<sup>DIPeP</sup>BDI\*)Mg( $\mu^2, \mu^A$ -anthracene)Ca(<sup>DIPeP</sup>BDI) (**5**). One dipep moiety and two additional 3-pentyl groups were affected. The disorder was modeled with the help of similarity restraints (SADI, SIMU). The relative occupancies of the two alternative orientations of each group were refined to 0.821(5)/0.179(5) (dipep), 0.835(8)/0.165(8) (3-pentyl) and 0.640(9)/0.360(9) (3-pentyl), respectively. Nevertheless, it was possible to observe and refine the positions of the hydrogen atoms of the reduced anthracene ligand.

The positions of the hydrogen atoms of the reduced naphthalene ligands in (<sup>DIPeP</sup>BDI\*)Mg( $\mu^2, \mu^A$ -naphthalene)Ca(<sup>DIPeP</sup>BDI) (**4**) and (<sup>DIPeP</sup>BDI)Ca( $\mu^A, \mu^A$ -naphthalene)Ca(<sup>DIPeP</sup>BDI) (**6**) were likewise observed from difference Fourier maps and refined. The latter compound also showed disorder of a 3-pentyl moiety, which was treated using similarity restraints (SADI, SIMU). The relative occupancies of the two alternative orientations of this group were refined to 0.917(3) and 0.083(3).

Substantially disordered solvent was also observed ( $^{\text{DIPeP}}\text{BDI})\text{Ca}(\mu^{\delta},\mu^{\delta}\text{-anthracene})\text{Ca}(\text{DIPePBDI})\cdot 0.81(n\text{-Hexane})$  (**7**). In this case, an infinite channel filled with a non-stoichiometric amount of *n*-hexane seems to be present. A disorder model, which included three alternative positions for the *n*-hexane was built with the help of similarity restraints (SADI, SIMU). From this model, it was deduced that approximately 0.8 *n*-hexane per metal complex is incorporated in the crystal. Additionally, extensive disorder of one of the 3-pentyl groups was noticed and modeled with the help of similarity restraints (SADI, SIMU) restraints. The relative occupancies of the three alternative orientations of this group were refined to 0.452(2), 0.395(3) and 0.153(3).

Crystallographic and refinement data are summarized in Table S1.

The crystal structure data of the compounds have been deposited with the Cambridge Crystallographic Data Centre. CCDC 2240705 (compound **2**), 2240706 (compound **4**), 2240707 (compound **5**), 2240708 (compound **6**), and 2240709 (compound **7**) contain the supplementary crystallographic data for the compounds. This data can be obtained free of charge from The Cambridge Crystallographic Data Centre via [www.ccdc.cam.ac.uk/data\\_request/cif](http://www.ccdc.cam.ac.uk/data_request/cif).

**Table S1.** Crystal data and structure refinement for compounds **2**, **4-7**.

| Compound                                    | [( <sup>DIPeP</sup> BDI)CaH·(THF)] <sub>2</sub> ·2Hexane ( <b>2</b> )          | ( <sup>DIPeP</sup> BDI)Ca( $\mu^{\delta}$ , $\mu^{\delta}$ -anthracene)Ca( <sup>DIPeP</sup> BDI)·0.81( <i>n</i> -Hexane) ( <b>7</b> ) | ( <sup>DIPeP</sup> BDI)Ca( $\mu^{\delta}$ , $\mu^{\delta}$ -naphthalene)Ca( <sup>DIPeP</sup> BDI) ( <b>6</b> ) |
|---------------------------------------------|--------------------------------------------------------------------------------|---------------------------------------------------------------------------------------------------------------------------------------|----------------------------------------------------------------------------------------------------------------|
| Identification code                         | hasj180320a                                                                    | hasj210311a                                                                                                                           | hasj210304a                                                                                                    |
| Empirical formula                           | C <sub>94</sub> Ca <sub>2</sub> H <sub>160</sub> N <sub>4</sub> O <sub>2</sub> | C <sub>92.84</sub> H <sub>135.3</sub> Ca <sub>2</sub> N <sub>4</sub>                                                                  | C <sub>84</sub> H <sub>122</sub> Ca <sub>2</sub> N <sub>4</sub>                                                |
| Formula weight                              | 1458.41                                                                        | 1387.65                                                                                                                               | 1268.01                                                                                                        |
| Temperature/K                               | 100.0(2)                                                                       | 100.0(2)                                                                                                                              | 100.0(1)                                                                                                       |
| Crystal system                              | triclinic                                                                      | monoclinic                                                                                                                            | monoclinic                                                                                                     |
| Space group                                 | P-1                                                                            | C2/c                                                                                                                                  | C2/c                                                                                                           |
| a/Å                                         | 12.4506(6)                                                                     | 47.9193(6)                                                                                                                            | 29.7787(3)                                                                                                     |
| b/Å                                         | 12.9760(6)                                                                     | 12.7914(2)                                                                                                                            | 16.8207(2)                                                                                                     |
| c/Å                                         | 16.2431(6)                                                                     | 27.3845(4)                                                                                                                            | 14.94992(17)                                                                                                   |
| $\alpha$ /°                                 | 74.198(4)                                                                      | 90                                                                                                                                    | 90                                                                                                             |
| $\beta$ /°                                  | 73.222(4)                                                                      | 98.7696(12)                                                                                                                           | 90.0659(10)                                                                                                    |
| $\gamma$ /°                                 | 63.566(4)                                                                      | 90                                                                                                                                    | 90                                                                                                             |
| Volume/Å <sup>3</sup>                       | 2217.94(19)                                                                    | 16589.3(4)                                                                                                                            | 7488.40(15)                                                                                                    |
| Z                                           | 1                                                                              | 8                                                                                                                                     | 4                                                                                                              |
| $\rho_{\text{calc}}$ /cm <sup>3</sup>       | 1.092                                                                          | 1.111                                                                                                                                 | 1.125                                                                                                          |
| $\mu$ /mm <sup>-1</sup>                     | 1.463                                                                          | 1.530                                                                                                                                 | 1.652                                                                                                          |
| F(000)                                      | 808.0                                                                          | 6083.0                                                                                                                                | 2776.0                                                                                                         |
| Crystal size/mm <sup>3</sup>                | 0.175 × 0.128 × 0.089                                                          | 0.227 × 0.092 × 0.057                                                                                                                 | 0.403 × 0.345 × 0.225                                                                                          |
| Radiation                                   | Cu K $\alpha$ ( $\lambda$ = 1.54184)                                           | Cu K $\alpha$ ( $\lambda$ = 1.54184)                                                                                                  | Cu K $\alpha$ ( $\lambda$ = 1.54184)                                                                           |
| 2 $\theta$ range for data collection/°      | 5.764 to 145.668                                                               | 6.532 to 145.82                                                                                                                       | 5.936 to 145.41                                                                                                |
| Index ranges                                | -15 ≤ h ≤ 10, -15 ≤ k ≤ 11, -20 ≤ l ≤ 19                                       | -56 ≤ h ≤ 59, -15 ≤ k ≤ 14, -33 ≤ l ≤ 28                                                                                              | -36 ≤ h ≤ 34, -11 ≤ k ≤ 20, -18 ≤ l ≤ 18                                                                       |
| Reflections collected                       | 16717                                                                          | 64408                                                                                                                                 | 13885                                                                                                          |
| Independent reflections                     | 8583 [R <sub>int</sub> = 0.0343, R <sub>sigma</sub> = 0.0470]                  | 16214 [R <sub>int</sub> = 0.0315, R <sub>sigma</sub> = 0.0247]                                                                        | 7238 [R <sub>int</sub> = 0.0208, R <sub>sigma</sub> = 0.0281]                                                  |
| Data/restraints/parameters                  | 8583/25/481                                                                    | 16214/1121/1097                                                                                                                       | 7238/0/435                                                                                                     |
| Goodness-of-fit on F <sup>2</sup>           | 1.036                                                                          | 1.041                                                                                                                                 | 1.041                                                                                                          |
| Final R indexes [ I >=2 $\sigma$ (I)]       | R <sub>1</sub> = 0.0439, wR <sub>2</sub> = 0.1163                              | R <sub>1</sub> = 0.0392, wR <sub>2</sub> = 0.0974                                                                                     | R <sub>1</sub> = 0.0350, wR <sub>2</sub> = 0.0890                                                              |
| Final R indexes [all data]                  | R <sub>1</sub> = 0.0464, wR <sub>2</sub> = 0.1194                              | R <sub>1</sub> = 0.0457, wR <sub>2</sub> = 0.1023                                                                                     | R <sub>1</sub> = 0.0377, wR <sub>2</sub> = 0.0917                                                              |
| Largest diff. peak/hole / e Å <sup>-3</sup> | 0.47/-0.29                                                                     | 0.36/-0.33                                                                                                                            | 0.69/-0.38                                                                                                     |

**Table S1.** Crystal data and structure refinement for compounds **2**, **4-7** (continued).

| Compound                                    | ( <sup>DIPeP</sup> BDI*)Mg( $\mu^2, \mu^2$ -anthracene)Ca( <sup>DIPeP</sup> BDI) ( <b>5</b> ) | ( <sup>DIPeP</sup> BDI*)Mg( $\mu^2, \mu^2$ -naphthalene)Ca( <sup>DIPeP</sup> BDI) ( <b>4</b> ) |
|---------------------------------------------|-----------------------------------------------------------------------------------------------|------------------------------------------------------------------------------------------------|
| Identification code                         | hasj210728b                                                                                   | hasj201117b                                                                                    |
| Empirical formula                           | C <sub>94</sub> H <sub>136</sub> CaMgN <sub>4</sub>                                           | C <sub>90</sub> H <sub>134</sub> CaMgN <sub>4</sub>                                            |
| Formula weight                              | 1386.45                                                                                       | 1336.39                                                                                        |
| Temperature/K                               | 100.0(3)                                                                                      | 100.0(2)                                                                                       |
| Crystal system                              | orthorhombic                                                                                  | monoclinic                                                                                     |
| Space group                                 | Pca2 <sub>1</sub>                                                                             | P2 <sub>1</sub> /n                                                                             |
| a/Å                                         | 21.5514(3)                                                                                    | 12.38232(18)                                                                                   |
| b/Å                                         | 13.0869(2)                                                                                    | 28.8484(3)                                                                                     |
| c/Å                                         | 29.0951(4)                                                                                    | 21.8547(2)                                                                                     |
| $\alpha$ /°                                 | 90                                                                                            | 90                                                                                             |
| $\beta$ /°                                  | 90                                                                                            | 93.1984(12)                                                                                    |
| $\gamma$ /°                                 | 90                                                                                            | 90                                                                                             |
| Volume/Å <sup>3</sup>                       | 8206.0(2)                                                                                     | 7794.57(16)                                                                                    |
| Z                                           | 4                                                                                             | 4                                                                                              |
| $\rho_{\text{calc}}/\text{cm}^3$            | 1.122                                                                                         | 1.139                                                                                          |
| $\mu/\text{mm}^{-1}$                        | 1.079                                                                                         | 1.118                                                                                          |
| F(000)                                      | 3040.0                                                                                        | 2936.0                                                                                         |
| Crystal size/mm <sup>3</sup>                | 0.186 × 0.135 × 0.086                                                                         | 0.181 × 0.081 × 0.058                                                                          |
| Radiation                                   | Cu K $\alpha$ ( $\lambda$ = 1.54184)                                                          | Cu K $\alpha$ ( $\lambda$ = 1.54184)                                                           |
| 2 $\theta$ range for data collection/°      | 6.076 to 144.654                                                                              | 6.128 to 145.528                                                                               |
| Index ranges                                | -26 ≤ h ≤ 25, -15 ≤ k ≤ 16, -34 ≤ l ≤ 35                                                      | -14 ≤ h ≤ 15, -33 ≤ k ≤ 35, -25 ≤ l ≤ 26                                                       |
| Reflections collected                       | 38240                                                                                         | 44605                                                                                          |
| Independent reflections                     | 14603 [R <sub>int</sub> = 0.0532, R <sub>sigma</sub> = 0.0550]                                | 15115 [R <sub>int</sub> = 0.0269, R <sub>sigma</sub> = 0.0284]                                 |
| Data/restraints/parameters                  | 14603/2124/1201                                                                               | 15115/331/954                                                                                  |
| Goodness-of-fit on F <sup>2</sup>           | 1.020                                                                                         | 1.018                                                                                          |
| Final R indexes [ $I \geq 2\sigma(I)$ ]     | R <sub>1</sub> = 0.0523, wR <sub>2</sub> = 0.1356                                             | R <sub>1</sub> = 0.0362, wR <sub>2</sub> = 0.0879                                              |
| Final R indexes [all data]                  | R <sub>1</sub> = 0.0591, wR <sub>2</sub> = 0.1425                                             | R <sub>1</sub> = 0.0440, wR <sub>2</sub> = 0.0928                                              |
| Largest diff. peak/hole / e Å <sup>-3</sup> | 0.35/-0.17                                                                                    | 0.25/-0.32                                                                                     |
| Flack parameter                             | -0.003(10)                                                                                    | -                                                                                              |





**Figure S46.** ORTEP representation of  $[(\text{DIPePBDI})\text{CaH}\cdot(\text{THF})]_2$  (**2**) with atomic displacement ellipsoids set at 50% probability. Hydrogen atoms except hydrides are omitted for clarity.



**Figure S47.** ORTEP representation of  $(\text{DIPePBDI}^*)\text{Mg}(\mu^2, \mu^A\text{-naphthalene})\text{Ca}(\text{DIPePBDI})$  (**4**) with atomic displacement ellipsoids set at 50% probability. Hydrogen atoms are omitted for clarity.



**Figure S48.** ORTEP representation of  $(\text{DIPePBdI}^*)\text{Mg}(\mu^2, \mu^A\text{-anthracene})\text{Ca}(\text{DIPePBdI})$  (**5**) with atomic displacement ellipsoids set at 50% probability. Hydrogen atoms are omitted for clarity.



**Figure S49.** ORTEP representation of  $(\text{DIPeP-BDI})\text{Ca}(\mu^4, \mu^4\text{-naphthalene})\text{Ca}(\text{DIPeP-BDI})$  (**6**) with atomic displacement ellipsoids set at 50% probability. Hydrogen atoms are omitted for clarity.



**Figure S50.** ORTEP representation of  $(\text{DIPePBDI})\text{Ca}(\mu^\beta, \mu^\beta\text{-anthracene})\text{Ca}(\text{DIPePBDI})$  (**7**) with atomic displacement ellipsoids set at 50% probability. Hydrogen atoms are omitted for clarity.

## 4. DFT calculations

All calculations were carried out using Gaussian 16A.<sup>58</sup> All methods were used as implemented. All structures were fully optimized at a B3PW91/def2SVP level of theory.<sup>59–512</sup> All structures were characterized as true minima (NImag=0) or as transition states (NImag=1) by frequency calculations on the same level of theory. Energies were determined at a B3PW91/def2TZVP level of theory. Grimme's third dispersion correction with Becke-Johnson damping (GD3BJ) was applied, unless stated otherwise.<sup>513</sup> Charges were calculated via NBO7 Analyses.<sup>514</sup> All structures were evaluated using Molecule 2.3.<sup>515</sup> Topological analyses were carried out using the wavefunction of the calculation of B3PW91/def2TZVP level of theory with AIMAll (v17).<sup>516,517</sup>



**Figure S51.** Calculated isomerization energy of (BDI)M(arom)M(BDI), (M = Ca, Mg; arom = benzene, naphthalene, anthracene).



**Figure S52.** Calculated monomerization energy of  $[(\text{DIPePBDI})\text{Ca}]_2$  (IX) in the presence of cyclohexane and benzene.



**Figure S53.** Selected calculated NPA charges of complexes (4-7).



**Figure S54.** Comparison of experimentally determined metal-C distances (X-ray) with calculated values (in *italic*) for the heterometallic complex (<sup>DIPePBDI\*</sup>Mg( $\mu^2, \mu^4$ -naphthalene)Ca(<sup>DIPePBDI</sup>)) (4).



**Figure S55.** Comparison of experimentally determined metal-C distances (X-ray) with calculated values (in *italic*) for the heterometallic complex (<sup>DIPePBDI\*</sup>Mg( $\mu^2, \mu^4$ -anthracene)Ca(<sup>DIPePBDI</sup>)) (5).





| bond    | X-Ray ( <i>DFT</i> ) distance [Å] |
|---------|-----------------------------------|
| Ca1-C1  | 2.654(1) ( <i>2.683</i> )         |
| Ca1-C2  | 2.642(1) ( <i>2.640</i> )         |
| Ca1-C3  | 2.951(1) ( <i>2.800</i> )         |
| Ca1-C8  | 2.964(1) ( <i>2.858</i> )         |
| Ca1-C9  | 2.674(1) ( <i>2.617</i> )         |
| Ca1-C10 | 2.673(1) ( <i>2.660</i> )         |
| Ca2-C3  | 2.964(1) ( <i>2.716</i> )         |
| Ca2-C4  | 2.674(1) ( <i>2.604</i> )         |
| Ca2-C5  | 2.673(1) ( <i>2.652</i> )         |
| Ca2-C6  | 2.654(1) ( <i>2.638</i> )         |
| Ca2-C7  | 2.642(1) ( <i>2.611</i> )         |
| Ca2-C8  | 2.951(1) ( <i>2.782</i> )         |

**Figure S56.** Comparison of experimentally determined metal-C distances (X-ray) with calculated values (in *italic*) for the homometallic complex  $(\text{DIPePBDI})\text{Ca}(\mu^A, \mu^A\text{-naphthalene})\text{Ca}(\text{DIPePBDI})$  (**6**).



| bond   | X-Ray ( <i>DFT</i> ) distance [Å] |
|--------|-----------------------------------|
| Ca1-C1 | 2.709(1) ( <i>2.625</i> )         |
| Ca1-C2 | 2.726(1) ( <i>2.705</i> )         |
| Ca1-C3 | 2.717(1) ( <i>2.695</i> )         |
| Ca1-C4 | 2.702(1) ( <i>2.665</i> )         |
| Ca1-C5 | 2.715(1) ( <i>2.715</i> )         |
| Ca1-C6 | 2.706(1) ( <i>2.678</i> )         |
| Ca2-C1 | 2.715(1) ( <i>2.682</i> )         |
| Ca2-C2 | 2.705(1) ( <i>2.691</i> )         |
| Ca2-C3 | 2.696(2) ( <i>2.695</i> )         |
| Ca2-C4 | 2.681(1) ( <i>2.668</i> )         |
| Ca2-C5 | 2.745(1) ( <i>2.627</i> )         |
| Ca2-C6 | 2.776(1) ( <i>2.653</i> )         |

**Figure S57.** Comparison of experimentally determined metal-C distances (X-ray) with calculated values (in *italic*) for the homometallic complex  $(\text{DIPePBDI})\text{Ca}(\mu^\beta, \mu^\beta\text{-anthracene})\text{Ca}(\text{DIPePBDI})$  (**7**).



**Figure S58.** Atoms-In-Molecules: Contour plots of the Laplacian,  $\nabla^2\rho(r)$ , of  $(\text{DIPP})\text{Mg}-\text{Mg}(\text{DIPP})$  (calculated with Dispersion) through the plane formed by the Mg and the two N atoms bound to Mg. Light-blue dots, bond critical point (BCP); purple dots, non-nuclear attractor (NNA); green boxes, NPA charges; red boxes, AIM charges; blue boxes, electron densities in the BCPs; orange boxes, Laplacian  $\nabla^2\rho$  in BCPs. Red dashed lines indicate areas of charge concentration, while blue solid lines show areas of charge depletion. DIPP-groups and hydrogen atoms were omitted for clarity.



**Figure S59.** Atoms-In-Molecules: Contour plots of the Laplacian,  $\nabla^2\rho(r)$ , of  $(\text{DIPP})\text{Mg}-\text{Mg}(\text{DIPP})$  (calculated without Dispersion) through the plane formed by the Mg and the two N atoms bound to Mg. Light-blue dots, bond critical point (BCP); purple dots, non-nuclear attractor (NNA); green boxes, NPA charges; red boxes, AIM charges; blue boxes, electron densities in the BCPs; orange boxes, Laplacian  $\nabla^2\rho$  in BCPs. Red dashed lines indicate areas of charge concentration, while blue solid lines show areas of charge depletion. DIPP-groups and hydrogen atoms were omitted for clarity.



**Figure S60.** Atoms-In-Molecules: Contour plots of the Laplacian,  $\nabla^2\rho(r)$ , of  $(\text{DIPPBDI})\text{Ca}-\text{Ca}(\text{DIPPBDI})$  (calculated with Dispersion) through the plane formed by the Mg and the two N atoms bound to Mg. Light-blue dots, bond critical point (BCP); green boxes, NPA charges; blue boxes, electron densities in the BCPs; orange boxes, Laplacian  $\nabla^2\rho$  in BCPs. Red dashed lines indicate areas of charge concentration, while blue solid lines show areas of charge depletion. DIPP-groups and hydrogen atoms were omitted for clarity.



**Figure S61.** Atoms-In-Molecules: Contour plots of the Laplacian,  $\nabla^2\rho(r)$ , of  $(\text{DIPPBDI})\text{Ca}-\text{Ca}(\text{DIPPBDI})$  (calculated without Dispersion) through the plane formed by the Mg and the two N atoms bound to Mg. Light-blue dots, bond critical point (BCP); purple dots, non-nuclear attractor (NNA); green boxes, NPA charges; red boxes, AIM charges; blue boxes, electron densities in the BCPs; orange boxes, Laplacian  $\nabla^2\rho$  in BCPs. Red dashed lines indicate areas of charge concentration, while blue solid lines show areas of charge depletion. DIPP-groups and hydrogen atoms were omitted for clarity.



**Figure S62.** Atoms-In-Molecules: Contour plots of the Laplacian,  $\nabla^2\rho(r)$ , of  $(\text{DIPPBDI})\text{Mg}-\text{Ca}(\text{DIPPBDI})$  (calculated with Dispersion) through the plane formed by the Mg and the two N atoms bound to Mg. Light-blue dots, bond critical point (BCP); green boxes, NPA charges; blue boxes, electron densities in the BCPs; orange boxes, Laplacian  $\nabla^2\rho$  in BCPs. Red dashed lines indicate areas of charge concentration, while blue solid lines show areas of charge depletion. DIPP-groups and hydrogen atoms were omitted for clarity.



**Figure S63.** Atoms-In-Molecules: Contour plots of the Laplacian,  $\nabla^2\rho(r)$ , of  $(\text{DIPPBDI})\text{Mg}-\text{Ca}(\text{DIPPBDI})$  (calculated without Dispersion) through the plane formed by the Mg and the two N atoms bound to Mg. Light-blue dots, bond critical point (BCP); green boxes, NPA charges; blue boxes, electron densities in the BCPs; orange boxes, Laplacian  $\nabla^2\rho$  in BCPs. Red dashed lines indicate areas of charge concentration, while blue solid lines show areas of charge depletion. DIPP-groups and hydrogen atoms were omitted for clarity.



**Figure S64.** AIM analysis of the  $(\text{DIPePBDI}^*)\text{Mg}(\mu^2, \mu^4\text{-naphthalene})\text{Ca}(\text{DIPePBDI})$  (**4**) complex given the electron densities  $\rho(r)$  (blue boxes) and the Laplacian of the electron densities  $\nabla^2\rho(r)$  (orange boxes) in the BCPs (bond critical points, light blue dots) (Magnesium: red; Calcium: orange). DIPeP-groups, tBu-groups and hydrogen atoms were omitted for clarity.



**Figure S65.** AIM analysis of the  $(\text{DIPePBDI}^*)\text{Mg}(\mu^2, \mu^4\text{-naphthalene})\text{Ca}(\text{DIPePBDI})$  (**4**) complex given the electron densities  $\rho(r)$  (blue boxes) and the Laplacian of the electron densities  $\nabla^2\rho(r)$  (orange boxes) in the BCPs (bond critical points, light blue dots) of the bridged naphthalene (Magnesium: red; Calcium: orange). Ligand systems and hydrogen atoms were omitted for clarity.



**Figure S66.** AIM analysis of the  $(\text{DIPePBDI}^*)\text{Mg}(\mu^2, \mu^1\text{-anthracene})\text{Ca}(\text{DIPePBDI})$  (**5**) complex given the electron densities  $\rho(r)$  (blue boxes) and the Laplacian of the electron densities  $\nabla^2\rho(r)$  (orange boxes) in the BCPs (bond critical points, light blue dots) (Magnesium: red; Calcium: orange). DIPeP-groups, *t*Bu-groups and hydrogen atoms were omitted for clarity.



**Figure S67.** AIM analysis of the  $(\text{DIPePBDI}^*)\text{Mg}(\mu^r, \mu^A\text{-anthracene})\text{Ca}(\text{DIPePBDI})$  (**5**) complex given the electron densities  $\rho(r)$  (blue boxes) and the Laplacian of the electron densities  $\nabla^2\rho(r)$  (orange boxes) in the BCPs (bond critical points, light blue dots) of the bridged anthracene (Magnesium: red; Calcium: orange). Ligand systems and hydrogen atoms were omitted for clarity.

### XYZ-coordinates

73

#### $(\text{DIPePBDI})\text{Mg}^\bullet$ Dispersion

Mg -0.000034 -0.000031 -1.010978  
 N -1.476080 -0.000067 0.434643  
 N 1.476055 0.000010 0.434599  
 C -2.467110 -0.000564 2.667988  
 H -3.099945 -0.880105 2.475450  
 H -2.167690 -0.000197 3.722834  
 H -3.100924 0.878170 2.475057  
 C -1.271225 -0.000181 1.750115  
 C 0.000016 -0.000054 2.354228  
 H 0.000033 -0.000063 3.443542  
 C 1.271238 0.000094 1.750076  
 C 2.467157 0.000485 2.667904  
 H 3.100991 -0.878224 2.474918  
 H 3.099957 0.880051 2.475365  
 H 2.167779 0.000078 3.722760  
 C -2.806918 -0.000074 -0.066058  
 C -3.444586 -1.228282 -0.348099  
 C -4.716313 -1.204304 -0.929398  
 H -5.219370 -2.146301 -1.159868

C -5.350844 0.000035 -1.221120  
 H -6.343784 0.000099 -1.677152  
 C -4.716455 1.204326 -0.928828  
 H -5.219657 2.146350 -1.158872  
 C -3.444747 1.228205 -0.347516  
 C -2.745469 -2.546181 -0.067275  
 H -1.918500 -2.333494 0.627095  
 C -3.655990 -3.573021 0.605766  
 H -3.081913 -4.469259 0.888161  
 H -4.467623 -3.904038 -0.061039  
 C -2.126336 -3.106940 -1.351002  
 H -2.904692 -3.337903 -2.095636  
 H -1.557290 -4.028510 -1.150096  
 C -2.745761 2.546023 -0.066001  
 H -1.919198 2.333156 0.628795  
 C -3.656602 3.572771 0.606745  
 H -3.082640 4.468965 0.889521  
 H -4.119852 3.163371 1.517559  
 C -2.125901 3.107070 -1.349244  
 H -2.903876 3.338398 -2.094162  
 H -1.439189 2.379504 -1.815810

C 2.806883 0.000071 -0.066132  
C 3.444784 -1.228177 -0.347573  
C 4.716505 -1.204230 -0.928855  
H 5.219766 -2.146226 -1.158880  
C 5.350834 0.000096 -1.221135  
H 6.343787 0.000084 -1.677139  
C 4.716243 1.204402 -0.929405  
H 5.219266 2.146425 -1.159841  
C 3.444503 1.228311 -0.348132  
C 2.745885 -2.546037 -0.066023  
H 1.919285 -2.333202 0.628740  
C 2.126110 -3.107190 -1.349261  
H 2.904129 -3.338501 -2.094138  
H 1.439366 -2.379696 -1.815894  
C 3.656778 -3.572690 0.606795  
H 3.082871 -4.468911 0.889595  
H 4.119975 -3.163217 1.517601  
C 2.745330 2.546170 -0.067253  
H 1.918340 2.333405 0.627068  
C 2.126230 3.106993 -1.350968  
H 2.904608 3.338041 -2.095551  
H 1.557138 4.028527 -1.150019  
C 3.655784 3.573000 0.605891  
H 3.081661 4.469198 0.888321  
H 4.467430 3.904092 -0.060861  
H 4.118601 3.163661 1.516952  
H 1.439651 2.379399 -1.817688  
H -4.467924 3.903890 -0.060384  
H -1.556774 4.028465 -1.147775  
H 4.468140 -3.903784 -0.060299  
H 1.557039 -4.028615 -1.147767  
H -4.118827 -3.163722 1.516834  
H -1.439709 -2.379337 -1.817637

73

**(<sup>DIPP</sup>BDI)Mg<sup>•</sup> no Dispersion**

Mg 0.000000 0.000020 -1.000497  
N 1.504273 -0.000023 0.426503  
N -1.504273 0.000008 0.426503  
C 2.458458 -0.000059 2.686456  
H 3.096717 0.879529 2.513353  
H 2.134628 -0.000094 3.734456  
H 3.096743 -0.879617 2.513302  
C 1.280761 -0.000046 1.740502  
C 0.000000 -0.000046 2.332579  
H 0.000000 -0.000070 3.422278  
C -1.280761 -0.000019 1.740502  
C -2.458458 -0.000058 2.686457  
H -3.096748 0.879504 2.513344  
H -3.096711 -0.879642 2.513313  
H -2.134627 -0.000070 3.734457  
C 2.839187 -0.000023 -0.077213  
C 3.481916 1.229596 -0.368597  
C 4.757383 1.201698 -0.944982  
H 5.260454 2.144231 -1.177289  
C 5.396913 -0.000012 -1.232571  
H 6.392396 -0.000008 -1.683962  
C 4.757354 -1.201729 -0.945069  
H 5.260401 -2.144257 -1.177448  
C 3.481888 -1.229638 -0.368683  
C 2.809252 2.569928 -0.103658  
H 1.896165 2.368360 0.477349  
C 3.680266 3.515021 0.731976

H 3.125058 4.434141 0.978666  
H 4.591407 3.819983 0.192797  
C 2.376792 3.237559 -1.415960  
H 3.246246 3.470138 -2.052006  
H 1.840762 4.180522 -1.220617  
C 2.809185 -2.569974 -0.103860  
H 1.896118 -2.368434 0.477189  
C 3.680187 -3.515183 0.731655  
H 3.124951 -4.434308 0.978267  
H 3.996449 -3.048992 1.677588  
C 2.376670 -3.237455 -1.416219  
H 3.246101 -3.470000 -2.052309  
H 1.709461 -2.583058 -2.001461  
C -2.839188 0.000031 -0.077213  
C -3.481878 1.229656 -0.368662  
C -4.757343 1.201765 -0.945052  
H -5.260382 2.144301 -1.177419  
C -5.396913 0.000059 -1.232571  
H -6.392395 0.000070 -1.683962  
C -4.757394 -1.201661 -0.944999  
H -5.260473 -2.144186 -1.177318  
C -3.481926 -1.229578 -0.368616  
C -2.809161 2.569982 -0.103829  
H -1.896101 2.368430 0.477225  
C -2.376630 3.237465 -1.416182  
H -3.246054 3.470022 -2.052277  
H -1.709424 2.583064 -2.001421  
C -3.680160 3.515198 0.731684  
H -3.124915 4.434315 0.978304  
H -3.996434 3.049007 1.677613  
C -2.809275 -2.569919 -0.103690  
H -1.896183 -2.368364 0.477315  
C -2.376830 -3.237548 -1.415998  
H -3.246290 -3.470114 -2.052040  
H -1.840808 -4.180517 -1.220663  
C -3.680295 -3.515008 0.731945  
H -3.125095 -4.434135 0.978627  
H -4.591442 -3.819957 0.192770  
H -3.996503 -3.048710 1.677843  
H -1.709607 -2.583238 -2.001322  
H 4.591302 -3.820125 0.192421  
H 1.840610 -4.180419 -1.220960  
H -4.591267 3.820152 0.192445  
H -1.840562 4.180422 -1.220915  
H 3.996485 3.048722 1.677870  
H 1.709573 2.583246 -2.001284

146

**(<sup>DIPP</sup>BDI)Mg-Mg(<sup>DIPP</sup>BDI) dispersion**

Mg -1.434392 0.125374 -0.093277  
Mg 1.428171 -0.167684 0.071355  
N -2.994934 -0.845781 -1.112582  
N 2.789681 -1.249831 1.243939  
N -2.891815 1.378706 0.730931  
N 3.083243 0.589607 -0.967441  
C -5.244205 -1.468382 -1.848682  
C 4.894281 -2.102499 2.156612  
H -4.919946 -1.601841 -2.890658  
H 4.486512 -3.117229 2.268037  
H -6.265764 -1.069406 -1.838178  
H 5.954593 -2.167925 1.883861  
H -5.256916 -2.474199 -1.400444  
H 4.817258 -1.630314 3.148406



C -4.294483 -0.579416 -1.083854  
C 4.111744 -1.298853 1.147362  
C -4.858252 0.478114 -0.347916  
C 4.849018 -0.607683 0.168842  
H -5.938266 0.594569 -0.428760  
H 5.928141 -0.754459 0.190988  
C -4.201756 1.388563 0.497001  
C 4.367745 0.278667 -0.808707  
C -5.054176 2.435706 1.170053  
C 5.388625 0.909265 -1.723538  
H -4.721721 3.444080 0.881106  
H 5.174446 0.655261 -2.772536  
H -4.949574 2.382558 2.264042  
H 5.345032 2.006979 -1.661323  
H -6.112945 2.322918 0.907517  
H 6.405759 0.579581 -1.479823  
C -2.514026 -1.904450 -1.918896  
C 2.132795 -1.998033 2.249780  
C -2.145952 -1.640741 -3.260103  
C 1.720064 -3.322453 1.967421  
C -1.555810 -2.678802 -3.988472  
C 0.970795 -3.991399 2.940707  
H -1.259098 -2.513581 -5.024250  
H 0.633033 -5.011699 2.758691  
C -1.325442 -3.928857 -3.415925  
C 0.639135 -3.380295 4.149151  
H -0.844454 -4.715105 -4.002782  
H 0.042445 -3.922544 4.886580  
C -1.728343 -4.180352 -2.108872  
C 1.084659 -2.091694 4.422593  
H -1.569326 -5.170612 -1.674886  
H 0.845466 -1.629722 5.383817  
C -2.344524 -3.182702 -1.346461  
C 1.843060 -1.382440 3.485739  
C -2.459619 -0.287239 -3.895531  
C 2.152473 -4.006786 0.671724  
H -3.531922 -0.104370 -3.703827  
H 3.248968 -3.885061 0.616376  
C -2.284090 -0.283329 -5.412852  
C 1.882767 -5.510175 0.669864  
H -2.646494 0.668219 -5.829814  
H 2.327329 -5.969782 -0.225512  
H -1.225779 -0.382404 -5.705293  
H 0.803836 -5.731654 0.646718  
C -1.712292 0.904437 -3.276707  
C 1.590997 -3.370670 -0.609526  
H -1.832665 1.797401 -3.908174  
H 1.762345 -4.032670 -1.471453  
H -2.123437 1.165909 -2.292523  
H 2.099020 -2.424988 -0.841891  
C -2.839261 -3.467551 0.060993  
C 2.361161 0.012105 3.794435  
H -3.469746 -2.616510 0.357900  
H 3.065475 0.276471 2.991926  
C -3.704525 -4.727478 0.121980  
C 3.129339 0.058065 5.116701  
H -4.140300 -4.847407 1.126302  
H 3.580572 1.051460 5.267003  
H -4.529097 -4.687789 -0.606248  
H 3.935528 -0.690885 5.143525  
C -1.688879 -3.542780 1.061564  
C 1.244863 1.055301 3.772428  
H -1.021906 -4.386192 0.831722

H 0.528887 0.888637 4.590886  
H -1.070909 -2.630862 1.050873  
H 0.673137 1.029900 2.831555  
C -2.343420 2.327207 1.630284  
C 2.718858 1.535305 -1.957956  
C -1.856530 3.554792 1.133509  
C 2.369333 1.088703 -3.249919  
C -1.190294 4.411062 2.016521  
C 1.857028 2.019772 -4.159874  
H -0.796075 5.362210 1.650034  
H 1.557380 1.689606 -5.157560  
C -1.036006 4.076679 3.359281  
C 1.741857 3.364602 -3.818409  
H -0.508962 4.754688 4.034911  
H 1.341229 4.080280 -4.540401  
C -1.579970 2.890090 3.848643  
C 2.167028 3.803873 -2.565618  
H -1.486422 2.657511 4.911151  
H 2.111014 4.867269 -2.325444  
C -2.244322 1.998783 3.001922  
C 2.658414 2.905561 -1.614742  
C -2.086886 3.938029 -0.318574  
C 2.585661 -0.362944 -3.641445  
H -2.833804 3.235534 -0.716624  
H 3.238792 -0.804852 -2.874576  
C -0.827507 3.776868 -1.167177  
C 1.286949 -1.163035 -3.631855  
H -0.059330 4.507129 -0.876020  
H 0.593914 -0.795008 -4.401500  
H -0.377591 2.776645 -1.060968  
H 0.762074 -1.094005 -2.665596  
C -2.664038 5.347515 -0.458440  
C 3.301051 -0.496556 -4.986723  
H -2.924726 5.554211 -1.508322  
H 3.551671 -1.550322 -5.185829  
H -3.571835 5.476319 0.150850  
H 4.234097 0.087250 -5.009093  
C -2.883424 0.717770 3.515591  
C 3.154452 3.360214 -0.250685  
H -3.724749 0.497989 2.841233  
H 3.928248 2.639412 0.053939  
C -1.941186 -0.484651 3.437758  
C 2.068040 3.304666 0.825193  
H -1.139262 -0.414224 4.183293  
H 1.318527 4.093915 0.683584  
H -2.485152 -1.424522 3.616685  
H 2.503046 3.430327 1.828097  
C -3.456899 0.859844 4.924161  
C 3.808034 4.740311 -0.281661  
H -4.022002 -0.044300 5.198916  
H 4.266897 4.966907 0.693202  
H -2.664687 0.986179 5.679204  
H 3.075176 5.537147 -0.485330  
H -4.134865 1.723868 5.000737  
H 4.592694 4.800448 -1.051525  
H -1.443464 -0.568935 2.457888  
H 1.515591 2.351290 0.818844  
H -3.118300 -5.635654 -0.090367  
H 2.469149 -0.135413 5.977154  
H -2.057748 -3.679371 2.089316  
H 1.648692 2.072146 3.890226  
H -1.941385 6.117285 -0.144186  
H 2.671377 -0.148058 -5.820669

H -1.043492 3.932819 -2.234745  
H 1.470782 -2.229515 -3.830650  
H -2.844932 -1.097762 -5.895361  
H 2.311899 -6.007861 1.552379  
H -0.634956 0.722243 -3.170149  
H 0.510733 -3.184509 -0.551909

146

**(<sup>DIPP</sup>BDI)Mg-Mg(<sup>DIPP</sup>BDI) no dispersion**

Mg -1.562963 0.002295 0.002365  
Mg 1.563420 -0.000596 -0.001311  
N -3.095763 -1.052978 1.047310  
N 3.099344 1.042453 1.051483  
N -3.096554 1.059858 -1.039535  
N 3.093665 -1.048703 -1.057310  
C -5.358769 -1.737475 1.728198  
C 5.364315 1.720663 1.731726  
H -5.194084 -2.810461 1.550303  
H 5.199278 1.548800 2.805577  
H -6.405233 -1.501259 1.499267  
H 6.410108 1.487709 1.496476  
H -5.189549 -1.576289 2.803039  
H 5.198062 2.795167 1.565032  
C -4.411910 -0.899429 0.898787  
C 4.414970 0.890215 0.897489  
C -5.014123 0.005403 0.006635  
C 5.014433 -0.005940 -0.005260  
H -6.103499 0.006469 0.008099  
H 6.103806 -0.007428 -0.006718  
C -4.412555 0.908892 -0.887336  
C 4.410093 -0.900244 -0.906633  
C -5.360016 1.748423 -1.714641  
C 5.354927 -1.732479 -1.744158  
H -5.194606 1.585435 -2.789842  
H 5.185324 -2.806761 -1.579419  
H -5.192130 2.821207 -1.538742  
H 5.188345 -1.557726 -2.817332  
H -6.406337 1.515059 -1.482144  
H 6.401956 -1.503502 -1.510535  
C -2.629076 -2.010966 1.992522  
C 2.635528 1.991309 2.007233  
C -2.385504 -3.343829 1.576121  
C 2.392096 1.579014 3.341391  
C -1.777900 -4.222338 2.480970  
C 1.786630 2.487300 4.217865  
H -1.568585 -5.250505 2.173849  
H 1.576889 2.183142 5.246811  
C -1.448405 -3.816550 3.772027  
C 1.459941 3.778100 3.809045  
H -0.966520 -4.515415 4.460747  
H 0.979998 4.469658 4.506443  
C -1.770721 -2.529062 4.194366  
C 1.782353 4.196364 2.520248  
H -1.555739 -2.234836 5.225173  
H 1.569517 5.226893 2.223522  
C -2.379045 -1.611702 3.329349  
C 2.387595 3.327471 1.604523  
C -2.830811 -3.831513 0.201053  
C 2.834602 0.204093 3.832122  
H -3.493557 -3.056499 -0.211591  
H 3.500633 -0.209196 3.060222  
C -3.646664 -5.127451 0.284876  
C 3.644631 0.288069 5.131705

H -4.058236 -5.386566 -0.703801  
H 4.055639 -0.700482 5.392168  
H -3.031797 -5.980642 0.613586  
H 3.025671 0.615955 5.982243  
C -1.673841 -3.988823 -0.788770  
C 1.676733 -0.785360 3.984786  
H -2.052401 -4.231951 -1.794460  
H 2.053897 -1.790473 4.232535  
H -1.069302 -3.071735 -0.870288  
H 1.077971 -0.869090 3.064148  
C -2.818204 -0.241417 3.835517  
C 2.825573 3.828989 0.232168  
H -3.482285 0.182496 3.067732  
H 3.484228 3.056980 -0.192644  
C -3.629699 -0.338589 5.133341  
C 3.644446 5.122497 0.325144  
H -4.038159 0.647957 5.405216  
H 4.050421 5.391533 -0.663210  
H -4.473804 -1.039360 5.038813  
H 4.490822 5.023941 1.022613  
C -1.657941 0.742971 4.000861  
C 1.663223 3.999577 -0.748943  
H -0.976811 0.425275 4.804624  
H 0.988210 4.808445 -0.431099  
H -1.058591 0.836144 3.081607  
H 1.057533 3.084141 -0.838250  
C -2.630659 2.016017 -1.986992  
C 2.625070 -1.995742 -2.012546  
C -2.385122 1.615156 -3.324221  
C 2.374913 -3.331479 -1.609760  
C -1.777163 2.530507 -4.191624  
C 1.765254 -4.198538 -2.524256  
H -1.565762 2.235083 -5.222804  
H 1.550697 -5.228670 -2.227427  
C -1.450500 3.817500 -3.771123  
C 1.440307 -3.778903 -3.811981  
H -0.968733 4.514695 -4.461618  
H 0.957004 -4.469047 -4.508460  
C -1.775352 4.224922 -2.479464  
C 1.768640 -2.488584 -4.220939  
H -1.562574 5.252741 -2.173624  
H 1.556788 -2.183381 -5.249177  
C -2.382789 3.348579 -1.572367  
C 2.378733 -1.582164 -3.345745  
C -2.828501 0.245447 -3.828348  
C 2.815077 -3.834523 -0.238600  
H -3.491984 -0.176510 -3.058943  
H 3.478036 -3.064971 0.183926  
C -1.670919 -0.741853 -3.995262  
C 1.655304 -4.000442 0.746358  
H -0.990861 -0.426663 -4.800861  
H 0.975714 -4.806310 0.430696  
H -1.069548 -0.835504 -3.077430  
H 1.053849 -3.082493 0.838155  
C -3.642538 0.343138 -5.124477  
C 3.628720 -5.131174 -0.333886  
H -4.053383 -0.642872 -5.394685  
H 4.037383 -5.401181 0.653087  
H -4.485132 1.045552 -5.028569  
H 4.472839 -5.036289 -1.034606  
C -2.823320 3.838296 -0.196486  
C 2.823349 -0.208463 -3.837831  
H -3.488878 3.066117 0.217059

H 3.488457 0.205514 -3.065534  
C -1.664019 3.990341 0.791393  
C 1.666653 0.781712 -3.994580  
H -0.981613 4.797115 0.484540  
H 0.984764 0.473943 -4.801551  
H -2.039733 4.237997 1.797051  
H 2.045232 1.785627 -4.244966  
C -3.633414 5.137999 -0.278499  
C 3.635564 -0.295830 -5.135898  
H -4.042433 5.398279 0.710933  
H 4.047483 0.691884 -5.398150  
H -3.014955 5.988515 -0.607365  
H 3.017662 -0.625616 -5.986473  
H -4.477008 5.052784 -0.981104  
H 4.477323 -1.000212 -5.047444  
H -1.065414 3.069564 0.874208  
H 1.067195 0.868890 -3.074802  
H -3.012277 -0.678370 5.980351  
H 3.032952 5.973009 0.666853  
H -2.032595 1.746028 4.260409  
H 2.036408 4.254488 -1.753724  
H -3.026414 0.681056 -5.973160  
H 3.012675 -5.979537 -0.672763  
H -2.048577 -1.744301 -4.252765  
H 2.030936 -4.257324 1.749729  
H -4.488890 -5.037773 0.988578  
H 4.486823 0.992309 5.046123  
H -0.996274 -4.800646 -0.484582  
H 0.994254 -0.479151 4.791685

73

**(DIPPBDI)Ca<sup>•</sup> Dispersion**

Ca 0.013304 -0.411637 -1.294944  
N -1.433872 -0.312691 0.515385  
N 1.452851 -0.114456 0.493716  
C -2.427224 -0.154663 2.757423  
H -3.330592 -0.611666 2.332449  
H -2.656488 0.908120 2.936556  
H -2.208879 -0.612737 3.731328  
C -1.242638 -0.271275 1.827522  
C 0.029536 -0.272484 2.431964  
H 0.037201 -0.285534 3.522201  
C 1.286619 -0.152849 1.810149  
C 2.490579 -0.073850 2.718276  
H 3.261034 0.594741 2.310010  
H 2.951759 -1.069914 2.813890  
H 2.211894 0.264310 3.724443  
C -2.720747 -0.156798 -0.041968  
C -3.292783 1.133289 -0.162525  
C -4.532620 1.259804 -0.794684  
H -4.986124 2.249324 -0.892643  
C -5.195174 0.150405 -1.312232  
H -6.164195 0.269548 -1.802588  
C -4.611153 -1.109979 -1.218018  
H -5.129976 -1.972750 -1.639969  
C -3.372632 -1.288238 -0.594518  
C -2.552060 2.367464 0.320761  
H -1.703338 2.028771 0.932580  
C -3.420308 3.275551 1.192424  
H -2.821278 4.101574 1.606485  
H -4.245450 3.726002 0.618546  
C -1.967231 3.137841 -0.866963  
H -1.370559 3.998094 -0.525113

H -1.312903 2.495945 -1.481375  
C -2.748025 -2.666394 -0.467262  
H -1.651373 -2.521631 -0.431609  
C -3.131294 -3.327971 0.859487  
H -2.663322 -4.320910 0.950490  
H -2.806832 -2.723772 1.717452  
C -3.046505 -3.581745 -1.651499  
H -4.107264 -3.875893 -1.688015  
H -2.793193 -3.096367 -2.606749  
C 2.715050 0.136867 -0.085933  
C 2.967370 1.437084 -0.596874  
C 4.181062 1.679010 -1.245864  
H 4.394004 2.675937 -1.636164  
C 5.124033 0.666923 -1.408406  
H 6.067179 0.874346 -1.919393  
C 4.853749 -0.612188 -0.932339  
H 5.589500 -1.406525 -1.081056  
C 3.655125 -0.903468 -0.273880  
C 1.942645 2.542251 -0.404114  
H 0.948821 2.058312 -0.381969  
C 1.929252 3.565231 -1.536290  
H 2.844210 4.178096 -1.548756  
H 1.833100 3.076882 -2.518360  
C 2.104697 3.222987 0.957989  
H 1.347186 4.011605 1.091194  
H 1.989013 2.505974 1.781826  
C 3.360656 -2.320735 0.181321  
H 2.452318 -2.283848 0.801110  
C 3.050871 -3.219505 -1.019685  
H 3.916227 -3.290800 -1.697789  
H 2.786418 -4.238061 -0.693837  
C 4.486699 -2.908185 1.033927  
H 4.195973 -3.891746 1.434793  
H 5.407585 -3.053432 0.447412  
H 4.735174 -2.252312 1.881930  
H 2.205867 -2.825123 -1.609945  
H -4.223473 -3.456577 0.927415  
H -2.456279 -4.507529 -1.573581  
H 3.100551 3.686238 1.045206  
H 1.080435 4.254711 -1.415182  
H -3.865330 2.721398 2.032539  
H -2.762836 3.513681 -1.529700

73

**(DIPPBDI)Ca<sup>•</sup> noDispersion**

Ca 0.000018 -0.000582 -1.292124  
N -1.505920 -0.000126 0.483820  
N 1.505919 -0.000190 0.483842  
C -2.456921 -0.000095 2.744803  
H -3.095186 -0.879883 2.573377  
H -3.095335 0.879532 2.573120  
H -2.133088 0.000074 3.792879  
C -1.280992 -0.000155 1.794830  
C -0.000009 -0.000244 2.387077  
H -0.000015 -0.000305 3.476960  
C 1.280982 -0.000220 1.794850  
C 2.456888 -0.000264 2.744851  
H 3.095300 0.879387 2.573289  
H 3.095158 -0.880029 2.573337  
H 2.133029 -0.000212 3.792919  
C -2.829430 0.000024 -0.034126  
C -3.468044 1.230646 -0.348127  
C -4.724216 1.201590 -0.965067

H -5.221167 2.144298 -1.210326  
C -5.354142 0.000359 -1.274585  
H -6.334182 0.000492 -1.758430  
C -4.724543 -1.201029 -0.965055  
H -5.221746 -2.143610 -1.210295  
C -3.468369 -1.230419 -0.348109  
C -2.823652 2.575820 -0.037271  
H -1.881286 2.370773 0.494467  
C -3.692879 3.436063 0.888696  
H -3.165662 4.363858 1.162896  
H -4.639488 3.726737 0.405429  
C -2.471734 3.343222 -1.318187  
H -1.955008 4.287279 -1.081233  
H -1.810323 2.754884 -1.977196  
C -2.824385 -2.575786 -0.037218  
H -1.881912 -2.371004 0.494439  
C -3.693835 -3.435670 0.888875  
H -3.166905 -4.363613 1.163129  
H -3.947766 -2.905708 1.819561  
C -2.472827 -3.343407 -1.318097  
H -3.374315 -3.591576 -1.901365  
H -1.811226 -2.755365 -1.977181  
C 2.829421 0.000010 -0.034125  
C 3.468015 1.230647 -0.348062  
C 4.724188 1.201635 -0.965023  
H 5.221124 2.144364 -1.210232  
C 5.354115 0.000434 -1.274622  
H 6.334153 0.000596 -1.758473  
C 4.724521 -1.200982 -0.965162  
H 5.221726 -2.143544 -1.210473  
C 3.468360 -1.230416 -0.348208  
C 2.823644 2.575819 -0.037130  
H 1.881226 2.370756 0.494513  
C 2.471854 3.343362 -1.317993  
H 3.373264 3.591857 -1.901241  
H 1.810457 2.755112 -1.977091  
C 3.692843 3.435921 0.888995  
H 3.165667 4.363726 1.163242  
H 3.946875 2.906017 1.819686  
C 2.824378 -2.575791 -0.037373  
H 1.881866 -2.371027 0.494227  
C 2.472910 -3.343429 -1.318268  
H 3.374442 -3.591637 -1.901452  
H 1.956488 -4.287647 -1.081293  
C 3.693781 -3.435672 0.888774  
H 3.166854 -4.363634 1.162966  
H 4.640550 -3.726035 0.405632  
H 3.947633 -2.905725 1.819490  
H 1.811377 -2.755393 -1.977422  
H -4.640563 -3.726073 0.405680  
H -1.956444 -4.287641 -1.081102  
H 4.639513 3.726567 0.405831  
H 1.955159 4.287419 -1.080970  
H -3.947021 2.906259 1.819415  
H -3.373099 3.591686 -1.901520

146

**(DIPPBDI)Ca-Ca(DIPPBDI) dispersion**

Ca 1.767358 -0.090234 0.035513  
Ca -1.774711 0.054201 -0.123382  
N 3.478352 -1.279227 1.102776  
N -3.734536 -0.805513 -1.063235  
N 3.724941 0.777848 -0.840464

N -3.493642 1.148704 0.982927  
C 5.595611 -2.161238 1.988790  
C -6.029398 -1.438855 -1.673611  
H 4.946263 -2.813440 2.587374  
H -5.535783 -2.137483 -2.361897  
H 6.242153 -1.584745 2.668246  
H -6.706433 -2.005406 -1.016198  
H 6.258021 -2.790876 1.375054  
H -6.655851 -0.750806 -2.262256  
C 4.795108 -1.232495 1.104468  
C -5.026638 -0.654900 -0.858563  
C 5.529606 -0.346789 0.283598  
C -5.544245 0.248650 0.096405  
H 6.615888 -0.409858 0.360355  
H -6.631379 0.304051 0.166238  
C 5.021026 0.580259 -0.644300  
C -4.818680 1.107688 0.942693  
C 6.005411 1.379922 -1.459654  
C -5.597603 2.034239 1.841949  
H 5.822403 2.457380 -1.330694  
H -5.309696 1.879201 2.892656  
H 5.868719 1.170424 -2.531589  
H -5.355712 3.082236 1.608249  
H 7.044467 1.158304 -1.186010  
H -6.680750 1.890713 1.743228  
C 2.681582 -2.085418 1.925583  
C -3.130561 -1.728076 -1.924615  
C 2.400760 -1.690570 3.260885  
C -2.963737 -3.080080 -1.519939  
C 1.462387 -2.428938 3.985627  
C -2.191541 -3.919722 -2.325850  
H 1.237446 -2.152170 5.016077  
H -2.053459 -4.963315 -2.041022  
C 0.786797 -3.506726 3.415627  
C -1.569536 -3.449965 -3.482082  
H 0.050026 -4.060370 4.002084  
H -0.962324 -4.126539 -4.087658  
C 1.039342 -3.862397 2.095677  
C -1.706385 -2.116478 -3.849496  
H 0.497405 -4.698785 1.649751  
H -1.202906 -1.749919 -4.746122  
C 1.976931 -3.163383 1.329279  
C -2.475267 -1.235220 -3.083260  
C 3.085355 -0.468186 3.855805  
C -3.584345 -3.569361 -0.218514  
H 4.157154 -0.542799 3.609725  
H -4.627925 -3.214727 -0.201946  
C 2.979413 -0.391438 5.376569  
C -3.626184 -5.090440 -0.099499  
H 3.594634 0.438264 5.756187  
H -4.193037 -5.383238 0.797134  
H 1.944175 -0.204215 5.703736  
H -2.615816 -5.518306 0.000472  
C 2.574680 0.835263 3.223262  
C -2.891597 -2.961796 1.010628  
H 2.973050 1.712169 3.756561  
H -3.259969 -3.427743 1.937604  
H 2.920665 0.929265 2.182627  
H -3.114963 -1.887830 1.099967  
C 2.284562 -3.566422 -0.102094  
C -2.660259 0.215112 -3.494720  
H 2.674973 -2.666436 -0.612046  
H -2.937556 0.774094 -2.582024

C 3.419890 -4.594232 -0.135454  
C -3.852754 0.349131 -4.447203  
H 3.694763 -4.844121 -1.172532  
H -4.040003 1.405037 -4.699228  
H 4.316214 -4.212702 0.373997  
H -4.767156 -0.063797 -3.997206  
C 1.062259 -4.042272 -0.881001  
C -1.398819 0.858161 -4.065167  
H 0.663643 -4.992066 -0.490327  
H -1.103907 0.409165 -5.026832  
H 0.256390 -3.291554 -0.851649  
H -0.552031 0.761253 -3.366687  
C 3.204475 1.658627 -1.806682  
C -2.772232 2.051768 1.787188  
C 2.812568 2.966332 -1.423312  
C -2.289499 1.635138 3.053008  
C 2.105804 3.754272 -2.336203  
C -1.410588 2.470201 3.749173  
H 1.795288 4.761272 -2.045450  
H -1.030256 2.152192 4.723660  
C 1.782097 3.277247 -3.603241  
C -1.008374 3.694857 3.223519  
H 1.222289 3.904847 -4.300560  
H -0.317766 4.332643 3.780164  
C 2.165777 1.990749 -3.972416  
C -1.482465 4.096574 1.977870  
H 1.900153 1.614989 -4.964022  
H -1.156354 5.053440 1.562314  
C 2.870822 1.163386 -3.094119  
C -2.354694 3.292488 1.239559  
C 3.134103 3.499304 -0.038678  
C -2.699265 0.297731 3.641740  
H 3.704029 2.713668 0.480796  
H -3.408788 -0.158913 2.934779  
C 1.864032 3.764532 0.773202  
C -1.503570 -0.647973 3.773626  
H 1.268720 4.577390 0.329174  
H -0.762162 -0.259854 4.489909  
H 1.203665 2.880680 0.815535  
H -0.973993 -0.782770 2.814030  
C 4.020080 4.745719 -0.101234  
C -3.424336 0.463856 4.979322  
H 4.304413 5.073097 0.911337  
H -3.780929 -0.509277 5.352452  
H 4.943063 4.555187 -0.669548  
H -4.293671 1.132320 4.886288  
C 3.248725 -0.247859 -3.510155  
C -2.820588 3.735420 -0.136796  
H 3.818965 -0.686751 -2.677091  
H -3.513540 2.963270 -0.504990  
C 2.011894 -1.123311 -3.733296  
C -1.655061 3.819521 -1.127620  
H 1.410870 -0.757930 -4.580648  
H -0.944701 4.612002 -0.844783  
H 2.300021 -2.164567 -3.947917  
H -2.016931 4.039750 -2.144355  
C 4.155563 -0.252493 -4.743039  
C -3.591609 5.056142 -0.080439  
H 4.483335 -1.276477 -4.982450  
H -3.985200 5.320582 -1.074635  
H 3.633205 0.144509 -5.628182  
H -2.946693 5.885101 0.252426  
H 5.053263 0.363993 -4.584569

H -4.440885 4.996822 0.616866  
H 1.344464 -1.130324 -2.853419  
H -1.075074 2.880616 -1.167980  
H 3.115436 -5.523731 0.371961  
H -3.663506 -0.198576 -5.384430  
H 1.321678 -4.208753 -1.937372  
H -1.564242 1.931542 -4.243815  
H 3.498918 5.585825 -0.587590  
H -2.759532 0.890378 5.747492  
H 2.107758 4.052763 1.807634  
H -1.819742 -1.642290 4.125244  
H 3.325791 -1.318235 5.858443  
H -4.108155 -5.556764 -0.972075  
H 1.474874 0.895656 3.245047  
H -1.799620 -3.101204 0.973482

146

**(<sup>DIPP</sup>BDI)Ca-Ca(<sup>DIPP</sup>BDI) no dispersion**

Ca -1.938186 0.013208 0.008460  
Ca 1.937549 -0.008919 0.000606  
N -3.746188 1.080363 -1.070164  
N 3.738092 -1.105857 -1.060684  
N -3.754462 -1.036905 1.090358  
N 3.763663 1.061398 1.049530  
C -6.009940 1.754646 -1.734709  
C 5.996213 -1.798323 -1.725765  
H -5.848761 1.568571 -2.807274  
H 5.820558 -2.868840 -1.541974  
H -5.834236 2.829664 -1.579670  
H 5.825619 -1.640430 -2.801213  
H -7.056764 1.531960 -1.493929  
H 7.045255 -1.570719 -1.499643  
C -5.056254 0.929253 -0.899626  
C 5.049686 -0.952061 -0.903814  
C -5.650709 0.037684 0.018401  
C 5.651290 -0.040885 -0.010383  
H -6.740561 0.047041 0.023152  
H 6.741134 -0.050634 -0.013808  
C -5.063662 -0.865036 0.929841  
C 5.071474 0.882633 0.885193  
C -6.023195 -1.679064 1.769259  
C 6.038907 1.713575 1.698610  
H -5.850439 -1.500385 2.841195  
H 5.880273 2.786780 1.515008  
H -5.863723 -2.755932 1.609189  
H 5.874360 1.560113 2.775626  
H -7.068577 -1.440657 1.537530  
H 7.082036 1.467890 1.464234  
C -3.246459 2.005583 -2.024601  
C 3.229119 -2.050699 -1.991209  
C -2.937706 3.334740 -1.628430  
C 2.931573 -1.646748 -3.320553  
C -2.329966 4.191020 -2.553955  
C 2.314341 -2.561259 -4.181821  
H -2.086612 5.214686 -2.256027  
H 2.078265 -2.256764 -5.205296  
C -2.029769 3.768670 -3.845418  
C 1.994891 -3.849789 -3.764326  
H -1.552371 4.452609 -4.551901  
H 1.510298 -4.547597 -4.452105  
C -2.345589 2.469425 -4.231179  
C 2.300953 -4.243787 -2.465083  
H -2.113868 2.142519 -5.248728

H 2.055121 -5.259347 -2.142295  
C -2.954308 1.572302 -3.345883  
C 2.918328 -3.369246 -1.563226  
C -3.254116 3.847968 -0.229368  
C 3.268958 -0.250571 -3.828197  
H -3.807400 3.051236 0.291493  
H 3.822971 0.261415 -3.026210  
C -4.157489 5.087263 -0.255540  
C 4.180264 -0.285454 -5.061572  
H -4.443304 5.379064 0.767833  
H 4.477971 0.735193 -5.350956  
H -3.651130 5.952219 -0.713557  
H 3.675249 -0.738144 -5.930165  
C -1.979258 4.124450 0.576182  
C 2.006145 0.571711 -4.111459  
H -2.222688 4.424799 1.608148  
H 2.264257 1.600813 -4.409343  
H -1.325623 3.237333 0.628164  
H 1.346760 0.630882 -3.228849  
C -3.287791 0.163482 -3.820073  
C 3.243200 -3.851195 -0.154932  
H -3.829072 -0.334500 -3.000673  
H 3.797886 -3.041714 0.344504  
C -4.213826 0.167234 -5.042927  
C 4.148728 -5.089320 -0.159293  
H -4.509383 -0.860788 -5.307528  
H 4.439252 -5.359641 0.868641  
H -5.132658 0.744701 -4.858713  
H 5.070882 -4.919899 -0.735992  
C -2.023245 -0.657416 -4.101101  
C 1.973833 -4.111632 0.664897  
H -1.442241 -0.226941 -4.932530  
H 1.378948 -4.932900 0.233742  
H -1.352766 -0.695063 -3.225908  
H 1.318790 -3.224824 0.702269  
C -3.262854 -1.976059 2.035617  
C 3.279397 2.020566 1.978712  
C -2.957924 -1.556885 3.358648  
C 2.992149 3.343631 1.547582  
C -2.359254 -2.469643 4.234869  
C 2.400553 4.234656 2.450495  
H -2.118994 -2.154013 5.253985  
H 2.173754 5.253757 2.125087  
C -2.064612 -3.770572 3.838062  
C 2.095762 3.852678 3.753606  
H -1.595246 -4.467116 4.537584  
H 1.631455 4.563469 4.442064  
C -2.376709 -4.178693 2.544789  
C 2.390601 2.559283 4.173741  
H -2.150330 -5.203694 2.238230  
H 2.156086 2.263834 5.200197  
C -2.976183 -3.306708 1.628518  
C 2.982326 1.628645 3.311719  
C -3.270556 -0.147205 3.844700  
C 3.315100 3.814719 0.135207  
H -3.814402 0.361990 3.033907  
H 3.842632 2.990213 -0.369151  
C -1.993375 0.656700 4.116087  
C 2.044630 4.108895 -0.671205  
H -1.407557 0.214009 4.937624  
H 1.474841 4.943524 -0.231946  
H -1.333642 0.690899 3.232761  
H 1.367488 3.238995 -0.704387

C -4.183704 -0.145896 5.077031  
C 4.253023 5.028575 0.128178  
H -4.463999 0.884280 5.349529  
H 4.536421 5.292406 -0.903431  
H -5.111363 -0.711146 4.899182  
H 5.178291 4.834339 0.691894  
C -3.308228 -3.805047 0.227500  
C 3.295021 0.227944 3.823534  
H -3.841022 -2.990990 -0.288242  
H 3.829811 -0.299821 3.018695  
C -2.043572 -4.112946 -0.583275  
C 2.018389 -0.566479 4.124691  
H -1.469780 -4.939015 -0.133237  
H 1.442099 -0.104011 4.942110  
H -2.299715 -4.407183 -1.613924  
H 2.259160 -1.598308 4.427725  
C -4.245231 -5.019610 0.250320  
C 4.219656 0.249876 5.047344  
H -4.537960 -5.301829 -0.773772  
H 4.497773 -0.775300 5.340204  
H -3.762292 -5.898350 0.707286  
H 3.733280 0.718868 5.917842  
H -5.165554 -4.816405 0.818981  
H 5.148398 0.806588 4.849181  
H -1.367116 -3.243475 -0.638901  
H 1.349353 -0.619087 3.249189  
H -3.720969 0.604384 -5.926259  
H 3.641670 -5.964014 -0.597485  
H -2.279696 -1.693818 -4.374225  
H 2.225095 -4.389210 1.701388  
H -3.687418 -0.593208 5.953315  
H 3.775194 5.915776 0.574075  
H -2.233765 1.694603 4.397983  
H 2.292543 4.383331 -1.709311  
H -5.082367 4.906943 -0.824499  
H 5.098354 -0.863584 -4.875628  
H -1.385744 4.934759 0.122988  
H 1.412389 0.126598 -4.926126

146

**(D<sup>IPP</sup>BDI)Mg-Ca(D<sup>IPP</sup>BDI) dispersion**  
Mg 1.743521 0.000266 -0.000111  
Ca -1.499252 -0.000735 0.000048  
N 3.274328 1.444321 -0.010373  
N -3.332449 0.007205 1.412513  
N 3.275252 -1.442816 0.009911  
N -3.332815 -0.008149 -1.411920  
C 5.487927 2.476824 0.000609  
C -5.522756 0.007128 2.487973  
H 5.291375 3.106481 -0.880298  
H -5.313949 0.894283 3.105358  
H 6.548453 2.196846 0.007985  
H -6.589355 -0.004348 2.232330  
H 5.278865 3.105900 0.878958  
H -5.297282 -0.866124 3.118853  
C 4.589405 1.265506 -0.003811  
C -4.648654 0.004519 1.260167  
C 5.207392 0.001356 -0.000354  
C -5.277488 -0.000428 0.000544  
H 6.296915 0.001701 -0.000452  
H -6.367202 -0.000433 0.000684  
C 4.590208 -1.263187 0.003169  
C -4.648979 -0.005472 -1.259239

C 5.489479 -2.473949 -0.001450  
C -5.523384 -0.008392 -2.486825  
H 5.280519 -3.103220 -0.879682  
H -5.297890 0.864509 -3.118180  
H 5.293599 -3.103654 0.879574  
H -5.314911 -0.895892 -3.103835  
H 6.549830 -2.193318 -0.009180  
H -6.589919 0.003406 -2.230925  
C 2.720546 2.746196 -0.024172  
C -2.720164 0.021336 2.680997  
C 2.417846 3.357666 -1.262272  
C -2.371923 1.261574 3.270987  
C 1.699054 4.556638 -1.256003  
C -1.602366 1.253685 4.436628  
H 1.447328 5.037409 -2.204547  
H -1.319911 2.201787 4.900149  
C 1.298124 5.149344 -0.060176  
C -1.181797 0.057796 5.014323  
H 0.728641 6.081890 -0.074899  
H -0.570399 0.072613 5.919434  
C 1.643238 4.560174 1.153985  
C -1.542713 -1.156008 4.435606  
H 1.349882 5.043826 2.089386  
H -1.216168 -2.090284 4.898819  
C 2.362571 3.361688 1.196279  
C -2.312876 -1.200423 3.270202  
C 2.865202 2.714043 -2.564029  
C -2.816248 2.564181 2.628707  
H 3.603069 1.942672 -2.299578  
H -3.559177 2.303416 1.860690  
C 3.554364 3.710040 -3.497399  
C -3.495950 3.502798 3.626503  
H 3.960171 3.193208 -4.381308  
H -3.887395 4.394938 3.113084  
H 2.855772 4.479989 -3.862056  
H -2.794471 3.851710 4.400785  
C 1.714074 1.998829 -3.272533  
C -1.659164 3.269875 1.916910  
H 2.077448 1.426067 -4.140173  
H -2.017464 4.125261 1.324211  
H 1.191273 1.298625 -2.599347  
H -1.101740 2.603080 1.236235  
C 2.761425 2.734419 2.521165  
C -2.706468 -2.525843 2.641766  
H 3.440829 1.902007 2.285940  
H -3.388854 -2.292835 1.810533  
C 3.524178 3.717390 3.411426  
C -3.466979 -3.419875 3.623340  
H 3.886968 3.214549 4.321849  
H -3.813068 -4.338328 3.123692  
H 4.393387 4.145143 2.888704  
H -4.346758 -2.905111 4.038197  
C 1.563526 2.136791 3.259193  
C -1.501275 -3.262561 2.052721  
H 0.867765 2.923428 3.587782  
H -0.822170 -3.612544 2.843581  
H 0.996476 1.442023 2.617995  
H -0.892161 -2.625488 1.388486  
C 2.722221 -2.745008 0.023734  
C -2.720827 -0.022484 -2.680542  
C 2.364271 -3.360588 -1.196679  
C -2.314405 1.199249 -3.270421  
C 1.645581 -4.559459 -1.154313

C -1.544462 1.154747 -4.435951  
H 1.352230 -5.043168 -2.089686  
H -1.218557 2.088996 -4.899663  
C 1.301102 -5.148929 0.059880  
C -1.182887 -0.059124 -5.014155  
H 0.732122 -6.081781 0.074667  
H -0.571640 -0.073991 -5.919367  
C 1.702029 -4.556120 1.255660  
C -1.602599 -1.254983 -4.435809  
H 1.450797 -5.037108 2.204223  
H -1.319659 -2.203143 -4.898922  
C 2.420167 -3.356758 1.261855  
C -2.371955 -1.262778 -3.270020  
C 2.762507 -2.733039 -2.521617  
C -2.708490 2.524678 -2.642333  
H 3.441257 -1.900069 -2.286472  
H -3.391274 2.291687 -1.811434  
C 1.564074 -2.136437 -3.259593  
C -1.503641 3.261455 -2.052650  
H 0.868838 -2.923645 -3.587919  
H -0.824218 3.611571 -2.843174  
H 0.996627 -1.441950 -2.618447  
H -0.894728 2.624378 -1.388235  
C 3.526002 -3.715456 -3.411863  
C -3.468491 3.418665 -3.624327  
H 3.888329 -3.212389 -4.322346  
H -3.814965 4.337053 -3.124830  
H 4.395590 -4.142469 -2.889167  
H -4.347978 2.903834 -4.039732  
C 2.867429 -2.712963 2.563559  
C -2.815532 -2.565393 -2.627236  
H 3.604910 -1.941252 2.299028  
H -3.557643 -2.304621 -1.858422  
C 1.716041 -1.998289 3.272183  
C -1.657693 -3.271180 -1.916764  
H 0.968363 -2.718636 3.634769  
H -0.918018 -3.647428 -2.637276  
H 2.079203 -1.425450 4.139863  
H -2.015370 -4.126735 -1.323931  
C 3.557152 -3.708651 3.496838  
C -3.496355 -3.503908 -3.624385  
H 3.962874 -3.191631 4.380675  
H -3.887179 -4.396149 -3.110663  
H 2.858944 -4.478890 3.861620  
H -2.795727 -3.852627 -4.399525  
H 4.387887 -4.225894 2.992493  
H -4.336453 -3.007938 -4.133932  
H 1.192909 -1.298245 2.599083  
H -1.099636 -2.604520 -1.236465  
H 2.885054 4.555815 3.731627  
H -2.830260 -3.723861 4.469347  
H 1.886410 1.582394 4.154217  
H -1.817599 -4.142749 1.472723  
H 2.887534 -4.554424 -3.731951  
H -2.831321 3.722803 -4.469939  
H 1.886433 -1.581980 -4.154771  
H -1.820295 4.141541 -1.472676  
H 4.384957 4.227626 -2.993173  
H -4.335451 3.006871 4.137082  
H 0.966074 2.718818 -3.635183  
H -0.918794 3.646316 2.636594

**(D<sup>1</sup>PPBDI)Mg-Ca(D<sup>1</sup>PPBDI) no dispersion**

Mg -1.864158 -0.000318 -0.000233  
Ca 1.574075 0.000313 -0.000266  
N -3.384171 -1.408900 0.534153  
N 3.369785 1.429230 0.536181  
N -3.384499 1.407909 -0.534560  
N 3.370139 -1.428316 -0.536419  
C -5.656624 -2.294816 0.851448  
C 5.645978 2.301676 0.831437  
H -5.504416 -3.192984 0.234083  
H 5.483764 2.615783 1.873401  
H -6.700256 -1.972443 0.749588  
H 6.688721 1.980678 0.718811  
H -5.483243 -2.607421 1.891701  
H 5.485405 3.198757 0.214219  
C -4.696940 -1.196529 0.449314  
C 4.679502 1.204517 0.442968  
C -5.290116 -0.000718 -0.000243  
C 5.265286 0.000783 -0.000371  
H -6.379712 -0.000852 -0.000275  
H 6.354995 0.000958 -0.000494  
C -4.697211 1.195260 -0.449725  
C 4.679793 -1.203189 -0.443462  
C -5.657149 2.293410 -0.851626  
C 5.646532 -2.300113 -0.831940  
H -5.483110 2.607129 -1.891420  
H 5.486291 -3.197171 -0.214606  
H -5.505902 3.191047 -0.233243  
H 5.484267 -2.614374 -1.873851  
H -6.700694 1.970414 -0.750848  
H 6.689200 -1.978812 -0.719486  
C -2.933435 -2.678285 0.997929  
C 2.915046 2.698218 0.991751  
C -2.707897 -3.726929 0.069723  
C 2.661724 2.908742 2.372417  
C -2.199891 -4.943945 0.538229  
C 2.141656 4.142233 2.781414  
H -2.016881 -5.755820 -0.170440  
H 1.942993 4.314523 3.842675  
C -1.931637 -5.145784 1.889275  
C 1.874022 5.155212 1.865649  
H -1.542952 -6.106982 2.236298  
H 1.468114 6.111396 2.205766  
C -2.173292 -4.117981 2.795710  
C 2.129659 4.943785 0.513937  
H -1.972208 -4.282755 3.858023  
H 1.919066 5.742724 -0.201453  
C -2.674682 -2.879263 2.377399  
C 2.654574 3.731285 0.053270  
C -3.004325 -3.552650 -1.414145  
C 2.940670 1.828660 3.409404  
H -3.610516 -2.640073 -1.518695  
H 3.484734 1.019898 2.897376  
C -3.821956 -4.710360 -1.997956  
C 3.834417 2.324127 4.552502  
H -4.111865 -4.488446 -3.037528  
H 4.091899 1.493111 5.228502  
H -3.251228 -5.652737 -2.016037  
H 3.334861 3.095624 5.159984  
C -1.716388 -3.332495 -2.214945  
C 1.638840 1.231178 3.957195  
H -1.939904 -3.161149 -3.280829  
H 1.845683 0.407338 4.659150

H -1.157730 -2.459105 -1.839748  
H 0.997287 0.835627 3.152041  
C -2.936863 -1.791390 3.410790  
C 2.927796 3.538688 -1.432526  
H -3.434965 -0.960801 2.887872  
H 3.541568 2.630452 -1.534385  
C -3.876392 -2.259247 4.529091  
C 3.727132 4.693822 -2.045894  
H -4.119043 -1.423074 5.204521  
H 3.995184 4.463278 -3.089304  
H -4.823514 -2.653843 4.130171  
H 4.659757 4.883516 -1.492325  
C -1.629234 -1.242034 3.991735  
C 1.627558 3.304554 -2.210502  
H -1.067194 -2.024384 4.527644  
H 0.961706 4.179568 -2.156043  
H -0.979123 -0.848030 3.194529  
H 1.045850 2.456717 -1.808971  
C -2.933997 2.677468 -0.998072  
C 2.915689 -2.697546 -0.991586  
C -2.674667 2.878584 -2.377415  
C 2.655624 -3.730436 -0.052807  
C -2.173874 4.117621 -2.795508  
C 2.131011 -4.943217 -0.513096  
H -1.972461 4.282519 -3.857744  
H 1.920707 -5.742014 0.202539  
C -1.933199 5.145558 -1.888969  
C 1.875318 -5.155095 -1.864722  
H -1.544978 6.107005 -2.235821  
H 1.469675 -6.111497 -2.204543  
C -2.201762 4.943489 -0.538018  
C 2.142522 -4.142265 -2.780783  
H -2.019396 5.755418 0.170756  
H 1.943782 -4.314891 -3.841975  
C -2.709271 3.726180 -0.069735  
C 2.662232 -2.908503 -2.372167  
C -2.935718 1.790627 -3.411004  
C 2.928946 -3.537410 1.432916  
H -3.431823 0.958914 -2.887966  
H 3.542177 -2.628778 1.534515  
C -1.627659 1.243948 -3.993491  
C 1.628691 -3.303929 2.211056  
H -1.067653 2.027446 -4.529853  
H 0.963326 -4.179328 2.156834  
H -0.975955 0.850935 -3.197118  
H 1.046512 -2.456446 1.809478  
C -3.877149 2.257321 -4.528213  
C 3.729112 -4.691968 2.046301  
H -4.118572 1.421174 -5.204119  
H 3.997148 -4.461162 3.089657  
H -4.824795 2.649587 -4.128257  
H 4.661788 -4.881113 1.492633  
C -3.005904 3.551664 1.414071  
C 2.940562 -1.828537 -3.409439  
H -3.611771 2.638854 1.518459  
H 3.484630 -1.019562 -2.897746  
C -1.718005 3.331875 2.215042  
C 1.638381 -1.231445 -3.956814  
H -1.046726 4.201932 2.142802  
H 1.044298 -1.989277 -4.492468  
H -1.941628 3.160448 3.280891  
H 1.844746 -0.407616 -4.658921  
C -3.824029 4.709038 1.997853



C 3.833989 -2.323974 -4.552800  
H -4.114070 4.486924 3.037344  
H 4.090991 -1.493013 -5.229048  
H -3.253614 5.651600 2.016136  
H 3.334388 -3.095705 -5.159949  
H -4.745380 4.890632 1.422647  
H 4.774628 -2.755688 -4.177828  
H -1.159070 2.458637 1.839904  
H 0.997012 -0.835998 -3.151453  
H -3.420657 -3.053049 5.142736  
H 3.151634 5.633076 -2.059454  
H -1.827909 -0.424122 4.703356  
H 1.833085 3.097841 -3.273259  
H -3.423548 3.052604 -5.141525  
H 3.154217 -5.631590 2.059992  
H -1.825579 0.425865 -4.705123  
H 1.834283 -3.096970 3.273753  
H -4.743362 -4.892185 -1.422913  
H 4.774801 2.756144 4.177239  
H -1.044878 -4.202365 -2.142582  
H 1.044762 1.988806 4.493144

164

(D<sup>1</sup>PPBDI\*)Mg-Ca(D<sup>1</sup>PPBDI)

Ca 1.784830 -0.014056 0.152549  
Mg -1.397588 0.037060 0.054720  
N -2.850928 1.431177 -0.594889  
N -2.896611 -1.383609 0.530166  
N 3.525458 -1.429760 -0.534340  
N 3.664133 1.239389 0.737574  
C -4.164958 1.221265 -0.598354  
C -4.736244 0.010544 -0.146480  
H -5.808812 0.002328 -0.211941  
C -4.205076 -1.191154 0.373338  
C -5.181465 2.294102 -1.106119  
C -4.871980 2.669226 -2.560589  
H -3.912050 3.187854 -2.648440  
H -5.651449 3.348124 -2.940735  
H -4.854278 1.779697 -3.207533  
C -5.114097 3.558778 -0.238997  
H -5.284770 3.325410 0.822304  
H -5.897044 4.264352 -0.559028  
H -4.150122 4.069359 -0.336683  
C -6.641498 1.815536 -1.075562  
H -6.805496 0.931084 -1.708015  
H -7.281381 2.621911 -1.464974  
H -6.988386 1.586922 -0.057542  
C -5.262053 -2.277084 0.757055  
C -5.072118 -3.544397 -0.088058  
H -5.111048 -3.316320 -1.163400  
H -5.881445 -4.257595 0.134617  
H -4.122792 -4.044295 0.131233  
C -6.713779 -1.820159 0.542490  
H -6.968395 -0.937017 1.146089  
H -7.385230 -2.635232 0.852502  
H -6.934424 -1.599095 -0.511735  
C -5.132301 -2.639327 2.241912  
H -4.186609 -3.148087 2.453781  
H -5.947399 -3.322550 2.527969  
H -5.202948 -1.744578 2.878033  
C -2.146342 2.608522 -0.947451  
C -1.574333 2.741322 -2.240225  
C -0.760761 3.846756 -2.511479

H -0.332745 3.959378 -3.510509  
C -0.473638 4.793870 -1.534571  
H 0.159881 5.652792 -1.767214  
C -0.991669 4.630896 -0.254013  
H -0.738932 5.354353 0.523222  
C -1.821654 3.552438 0.063250  
C -2.234903 -2.555967 0.972201  
C -1.784879 -3.505606 0.016376  
C -1.021986 -4.595459 0.445477  
H -0.680426 -5.325819 -0.289849  
C -0.689637 -4.764517 1.785948  
H -0.111687 -5.634845 2.106232  
C -1.088400 -3.806124 2.711459  
H -0.802652 -3.920406 3.759891  
C -1.838051 -2.688796 2.329002  
C 5.734792 -2.433989 -0.908120  
H 5.572520 -2.623469 -1.978443  
H 5.492654 -3.374759 -0.396554  
H 6.795023 -2.205085 -0.746039  
C 4.846192 -1.309498 -0.423799  
C 5.505807 -0.182599 0.107001  
H 6.594420 -0.236408 0.105658  
C 4.962710 1.018661 0.607426  
C 5.952537 2.097534 0.985765  
H 5.576066 2.726018 1.803774  
H 6.133666 2.763461 0.126387  
H 6.918465 1.663258 1.275142  
C 3.013424 -2.621601 -1.095981  
C 2.690971 -3.717820 -0.264071  
C 2.296825 -4.916350 -0.871239  
H 2.064577 -5.775096 -0.235322  
C 2.190575 -5.028401 -2.253242  
H 1.897324 -5.977439 -2.707956  
C 2.395498 -3.904345 -3.051035  
H 2.230665 -3.979666 -4.126763  
C 2.770231 -2.679526 -2.491861  
C 3.170506 2.484417 1.172408  
C 2.705052 2.607599 2.503656  
C 2.194739 3.840529 2.921127  
H 1.851455 3.962827 3.949487  
C 2.098978 4.911211 2.038480  
H 1.691134 5.865946 2.378777  
C 2.495962 4.757487 0.712487  
H 2.381269 5.596408 0.026189  
C 3.033219 3.553162 0.251324  
C -1.782564 1.692792 -3.321461  
C 2.772472 1.417849 3.446640  
C 3.444180 3.368810 -1.203287  
C 2.838755 -1.413498 -3.336854  
C 2.727689 -3.670793 1.257701  
C -2.157380 -1.623337 3.365033  
C -2.071317 -3.333070 -1.465792  
C -2.308169 3.380065 1.493022  
C -2.808029 4.680615 2.124598  
C -1.206556 2.770772 2.360904  
H -3.144180 2.666721 1.470456  
H -3.269673 4.474893 3.103000  
H -1.981463 5.386756 2.301373  
H -3.553767 5.188245 1.496419  
H -1.569533 2.579695 3.383421  
H -0.836733 1.819626 1.939964  
H -0.337088 3.441451 2.415695  
C -2.180265 2.286889 -4.675172

C -0.529722 0.830268 -3.490862  
H -2.593879 1.032883 -2.979700  
H -2.437073 1.483199 -5.382975  
H -3.043831 2.961438 -4.598822  
H -1.350474 2.856830 -5.122350  
H -0.707989 0.016600 -4.209636  
H 0.314823 1.432707 -3.860994  
H -0.222130 0.382085 -2.530014  
C -0.858359 -2.726530 -2.171480  
C -2.478503 -4.632789 -2.162263  
H -2.902315 -2.619053 -1.557202  
H -1.076873 -2.533891 -3.233769  
H -0.551807 -1.774154 -1.704662  
H 0.007293 -3.400659 -2.111122  
H -2.807350 -4.423759 -3.192206  
H -1.631967 -5.333806 -2.232093  
H -3.298897 -5.145885 -1.640436  
C -0.913504 -0.783532 3.665919  
H -2.910299 -0.954841 2.920976  
C -2.722461 -2.188067 4.670601  
H -1.153747 0.043259 4.351516  
H -0.130301 -1.398547 4.137398  
H -0.487441 -0.354458 2.742007  
H -3.044293 -1.368217 5.331684  
H -3.584688 -2.847490 4.502686  
H -1.962754 -2.765452 5.220900  
C 1.980159 -1.499992 -4.596828  
H 2.404602 -0.613175 -2.709234  
C 4.255025 -0.960527 -3.702934  
H 1.903942 -0.509521 -5.068930  
H 2.420290 -2.181909 -5.341751  
H 0.963003 -1.848805 -4.372110  
H 4.209480 -0.085927 -4.370939  
H 4.839673 -0.669288 -2.821634  
H 4.795816 -1.759285 -4.235414  
C 4.125445 -3.817459 1.865353  
C 2.006453 -2.471596 1.875551  
H 2.150469 -4.555924 1.567945  
H 1.749325 -2.674086 2.924663  
H 2.666413 -1.586974 1.886745  
H 1.049239 -2.255269 1.366067  
H 4.050041 -3.965866 2.954537  
H 4.659233 -4.683029 1.444985  
H 4.734515 -2.917070 1.698106  
C 3.494222 4.674072 -1.992398  
H 4.464430 2.951918 -1.204974  
C 2.551322 2.346685 -1.925050  
H 3.905524 4.490305 -2.996336  
H 2.489864 5.104403 -2.123364  
H 4.129273 5.426387 -1.500918  
H 2.654731 2.433894 -3.016984  
H 2.867140 1.320506 -1.682760  
H 1.486679 2.490422 -1.681912  
C 1.736609 1.475282 4.565385  
H 2.548909 0.520113 2.840214  
C 4.176404 1.207496 4.020871  
H 4.184476 0.354314 4.717491  
H 4.912406 1.001178 3.233729  
H 4.504670 2.101624 4.574353  
H 1.709145 0.517644 5.105987  
H 1.978070 2.257117 5.302701  
H 0.729958 1.673169 4.173632

12

**C6H6**

C 1.395789 -0.031957 0.000000  
C 0.725522 1.192755 0.000000  
C -0.670196 1.224738 0.000000  
C -1.395749 0.031956 0.000000  
C 0.670174 -1.224710 0.000000  
C -0.725546 -1.192782 0.000000  
H 1.293513 2.126543 0.000000  
H -1.194832 2.183531 0.000001  
H -2.488415 0.056972 0.000000  
H 1.194830 -2.183515 -0.000001  
H -1.293515 -2.126558 0.000000  
H 2.488459 -0.056973 0.000000

176

**(DIPPBDI\*)Mg(C<sub>6</sub>H<sub>6</sub>)Ca(DIPPBDI)**

Ca 2.618480 -0.291131 0.320913  
Mg -1.966308 0.007880 0.027723  
N -3.283400 1.479985 -0.696555  
N -3.579505 -1.230447 0.536795  
N 4.488236 -1.302658 -0.613061  
N 4.385873 1.146054 0.875382  
C -4.605319 1.368227 -0.793360  
C -5.283747 0.225829 -0.327302  
H -6.351397 0.261244 -0.471534  
C -4.854811 -0.977224 0.290397  
C -5.496047 2.460173 -1.472655  
C -5.106069 2.622767 -2.948439  
H -4.099421 3.041827 -3.054176  
H -5.806147 3.318673 -3.436869  
H -5.153108 1.664759 -3.485985  
C -5.341088 3.821925 -0.784813  
H -5.590180 3.767045 0.284739  
H -6.027639 4.544973 -1.252691  
H -4.325566 4.217410 -0.891888  
C -6.994393 2.120820 -1.442362  
H -7.227634 1.200265 -1.996604  
H -7.549907 2.940993 -1.922103  
H -7.377893 2.019595 -0.416644  
C -6.041168 -1.956293 0.580562  
C -5.708483 -3.186349 1.434760  
H -4.998722 -3.864484 0.954704  
H -6.640367 -3.747552 1.606431  
H -5.294690 -2.920846 2.414007  
C -6.577460 -2.449744 -0.777411  
H -6.949704 -1.619576 -1.393574  
H -7.406897 -3.157257 -0.617390  
H -5.798237 -2.968773 -1.350936  
C -7.182540 -1.219249 1.312821  
H -6.837447 -0.770243 2.255098  
H -7.978189 -1.940000 1.557209  
H -7.639557 -0.422951 0.711607  
C -2.433600 2.509977 -1.158801  
C -1.767011 2.397908 -2.414397  
C -0.749714 3.328144 -2.683740  
H -0.224498 3.283806 -3.636514  
C -0.359774 4.299972 -1.770498  
H 0.452301 4.987574 -2.018087  
C -1.012642 4.390232 -0.547529  
H -0.705270 5.148252 0.175739  
C -2.053449 3.518743 -0.227264  
C -2.996707 -2.369685 1.140540

C -2.649892 -3.500031 0.363026  
C -1.934617 -4.537838 0.968575  
H -1.664889 -5.415191 0.375086  
C -1.567070 -4.478417 2.308101  
H -1.020721 -5.305861 2.767521  
C -1.883993 -3.347065 3.055997  
H -1.568450 -3.293562 4.099209  
C -2.570770 -2.269694 2.490468  
C -0.214759 0.306394 1.466253  
H -0.226440 0.711937 2.480128  
C 0.266094 -1.099696 1.354739  
H 0.439802 -1.713734 2.243336  
C 0.348826 -1.621218 0.095959  
H 0.618074 -2.665025 -0.089740  
C -0.001842 -0.705949 -1.017452  
H 0.139912 -1.110861 -2.023260  
C 0.484480 0.685945 -0.819004  
C 0.394696 1.198402 0.444377  
C 6.691607 -1.866926 -1.533860  
H 6.819478 -1.406428 -2.526804  
H 6.279837 -2.873557 -1.684499  
H 7.689058 -1.946988 -1.080120  
C 5.773712 -1.007939 -0.697189  
C 6.346399 0.111620 -0.060613  
H 7.426675 0.223132 -0.168373  
C 5.689479 1.134327 0.656886  
C 6.568403 2.238684 1.203037  
H 5.980914 3.023409 1.697038  
H 7.170632 2.695500 0.403314  
H 7.276564 1.819749 1.935078  
C 3.865500 -2.415728 -1.203235  
C 3.530502 -3.533373 -0.391427  
C 2.696640 -4.520593 -0.926535  
H 2.429468 -5.377101 -0.301237  
C 2.193193 -4.429159 -2.221695  
H 1.528003 -5.203557 -2.609583  
C 2.550483 -3.346497 -3.018517  
H 2.164916 -3.279746 -4.039125  
C 3.387899 -2.336614 -2.536217  
C 3.663995 2.233451 1.392465  
C 3.005492 2.075431 2.639868  
C 2.117879 3.065558 3.068868  
H 1.597050 2.949047 4.020435  
C 1.878141 4.194429 2.292293  
H 1.177500 4.958201 2.636443  
C 2.531674 4.347467 1.070758  
H 2.325495 5.233320 0.468952  
C 3.425023 3.385253 0.595124  
H 0.682659 2.227522 0.672743  
H 0.817814 1.298334 -1.658011  
C -2.099544 1.378966 -3.523211  
C 3.302203 0.851890 3.487692  
C 4.085011 3.530256 -0.767018  
C 3.771510 -1.175791 -3.434752  
C 4.069570 -3.739135 1.018731  
C -2.809088 -0.994153 3.282675  
C -3.027715 -3.618605 -1.103948  
C -2.743002 3.658538 1.123122  
C -3.077025 5.115006 1.456583  
C -1.936490 3.033585 2.259897  
H -3.683539 3.096446 1.064724  
H -3.724003 5.161953 2.346538  
H -2.169587 5.695083 1.688064

H -3.595347 5.623871 0.631119  
H -2.444634 3.192637 3.224569  
H -1.815626 1.953353 2.111412  
H -0.928187 3.470603 2.325837  
C -0.889895 1.074931 -4.417581  
C -2.722889 0.034746 -3.126229  
H -2.839413 1.883390 -4.170464  
H -1.163505 0.312800 -5.162029  
H -0.528278 1.947073 -4.978547  
H -0.052573 0.677203 -3.827247  
H -2.852732 -0.572217 -4.035418  
H -2.050610 -0.529221 -2.461415  
H -3.700156 0.110369 -2.641964  
C -1.795697 -3.549964 -2.008002  
C -3.825413 -4.892980 -1.398376  
H -3.659868 -2.751959 -1.348507  
H -2.087501 -3.615975 -3.068233  
H -1.254143 -2.609405 -1.858656  
H -1.099546 -4.376795 -1.795869  
H -4.173289 -4.895907 -2.443476  
H -3.205724 -5.792594 -1.257433  
H -4.706467 -4.993788 -0.749064  
C -1.830506 -0.803510 4.438081  
H -2.631124 -0.166137 2.574931  
C -4.245620 -0.848759 3.783542  
H -1.921885 0.216482 4.841489  
H -2.031434 -1.500240 5.268044  
H -0.788777 -0.947384 4.120095  
H -4.361184 0.087996 4.351416  
H -4.956681 -0.818001 2.950892  
H -4.523803 -1.684158 4.446336  
C 2.553140 -0.350906 -3.847928  
H 4.429366 -0.514546 -2.852061  
C 4.556244 -1.656468 -4.658308  
H 2.851486 0.518175 -4.454202  
H 1.843857 -0.947414 -4.442280  
H 2.009140 0.021634 -2.969949  
H 4.910026 -0.800732 -5.254796  
H 5.430525 -2.255814 -4.364677  
H 3.930691 -2.282271 -5.314515  
C 5.573421 -4.027300 1.034826  
C 3.731009 -2.630822 2.018968  
H 3.564420 -4.649078 1.383000  
H 3.972481 -2.948347 3.044966  
H 4.323571 -1.724147 1.819453  
H 2.653191 -2.395335 2.007506  
H 5.887026 -4.368145 2.034369  
H 5.838560 -4.810127 0.308874  
H 6.154113 -3.124721 0.798651  
C 4.139094 4.970879 -1.268983  
H 5.125642 3.188114 -0.667884  
C 3.421448 2.626554 -1.809520  
H 4.744531 5.028317 -2.186258  
H 3.137570 5.354999 -1.518985  
H 4.585405 5.646275 -0.523365  
H 3.899940 2.747853 -2.793554  
H 3.523882 1.567436 -1.533620  
H 2.352064 2.862266 -1.910851  
C 2.186539 0.469406 4.453645  
H 3.446969 0.001043 2.797810  
C 4.638728 1.010592 4.219406  
H 4.885250 0.100899 4.789393  
H 5.457854 1.204265 3.514730

H 4.590021 1.855417 4.924425  
H 2.408714 -0.499859 4.925048  
H 2.077714 1.206425 5.264449  
H 1.220993 0.386054 3.936062

176

**TS bridged C<sub>6</sub>H<sub>6</sub>**

Ca -2.454215 -0.239846 -0.253621  
Mg 1.989694 -0.078554 -0.325628  
N 3.257564 1.418128 0.297629  
N 3.475654 -1.503218 -0.572612  
N -4.375206 -0.890340 0.962532  
N -3.792300 1.753451 -0.210772  
C 4.596912 1.284353 0.210649  
C 5.221205 0.082964 -0.161191  
H 6.295695 0.148409 -0.176192  
C 4.765936 -1.222676 -0.474648  
C 5.588379 2.460534 0.521792  
C 5.548434 2.831145 2.013444  
H 4.606839 3.309814 2.299286  
H 6.361352 3.540445 2.234738  
H 5.698629 1.941453 2.643161  
C 5.281406 3.699749 -0.335653  
H 5.258040 3.444350 -1.405594  
H 6.077349 4.445929 -0.188838  
H 4.334444 4.176909 -0.067851  
C 7.055947 2.105821 0.215715  
H 7.440660 1.296316 0.852551  
H 7.673362 2.993572 0.417776  
H 7.210243 1.830981 -0.837802  
C 5.945313 -2.234108 -0.673936  
C 5.570812 -3.646696 -1.141696  
H 4.997521 -4.207841 -0.397846  
H 6.503863 -4.200685 -1.328955  
H 4.991719 -3.646347 -2.071642  
C 6.700007 -2.371261 0.663036  
H 7.100779 -1.410067 1.012809  
H 7.544214 -3.067805 0.539444  
H 6.050318 -2.772188 1.452761  
C 6.928057 -1.677565 -1.728047  
H 6.434658 -1.516762 -2.696799  
H 7.737547 -2.407121 -1.883335  
H 7.395169 -0.730953 -1.427776  
C 2.617021 2.589550 0.797139  
C 2.386530 2.733721 2.184779  
C 1.838619 3.930268 2.657749  
H 1.686589 4.063649 3.730360  
C 1.465711 4.945311 1.781798  
H 1.054458 5.880230 2.168874  
C 1.574571 4.742624 0.409061  
H 1.230327 5.514500 -0.279892  
C 2.134280 3.568670 -0.102206  
C 2.891217 -2.781174 -0.768876  
C 2.750366 -3.658761 0.329440  
C 2.080372 -4.870838 0.142912  
H 1.968807 -5.558052 0.984552  
C 1.552179 -5.213127 -1.096634  
H 1.033755 -6.165317 -1.230327  
C 1.659105 -4.322114 -2.159958  
H 1.205949 -4.583910 -3.115894  
C 2.305330 -3.090869 -2.019868  
C -1.653870 -1.247497 -2.635646  
H -2.099355 -0.956709 -3.590825

C -2.164777 -2.361731 -1.943875  
H -2.982221 -2.959002 -2.345364  
C -1.436640 -2.798746 -0.808769  
H -1.729406 -3.724911 -0.308833  
C -0.350819 -2.090630 -0.333526  
H 0.183625 -2.520400 0.516066  
C 0.094931 -0.817117 -0.888141  
C -0.578260 -0.513268 -2.144596  
C -6.322746 -0.917324 2.454447  
H -5.937897 -0.739949 3.472974  
H -6.354398 -2.004497 2.307184  
H -7.342903 -0.512944 2.412308  
C -5.408761 -0.237430 1.461452  
C -5.708831 1.098561 1.133909  
H -6.634214 1.490127 1.557619  
C -4.976678 2.004682 0.340155  
C -5.622295 3.363281 0.147996  
H -5.203606 4.102989 0.848038  
H -6.704141 3.308593 0.324235  
H -5.441429 3.753352 -0.862706  
C -4.219526 -2.277533 1.122168  
C -4.758701 -3.160084 0.152980  
C -4.422499 -4.516129 0.245390  
H -4.824499 -5.207159 -0.501668  
C -3.587816 -5.002536 1.248882  
H -3.331999 -6.064155 1.283406  
C -3.088888 -4.127551 2.210028  
H -2.446644 -4.510193 3.007206  
C -3.401776 -2.766728 2.168924  
C -3.106872 2.821143 -0.827675  
C -2.996184 2.860338 -2.238008  
C -2.334854 3.941679 -2.831225  
H -2.257274 3.997412 -3.918323  
C -1.774079 4.952524 -2.055957  
H -1.269928 5.794757 -2.536055  
C -1.841582 4.877327 -0.665894  
H -1.378788 5.661057 -0.065083  
C -2.493809 3.819760 -0.028176  
H -0.229013 0.320880 -2.757328  
H -0.426778 0.293485 0.228032  
C 2.634830 1.571449 3.126303  
C -3.637395 1.770963 -3.079478  
C -2.527673 3.713905 1.487311  
C -2.879639 -1.813778 3.228411  
C -5.749595 -2.766752 -0.941576  
C 2.338488 -2.095239 -3.168196  
C 3.263177 -3.280234 1.706605  
C 2.199738 3.312971 -1.593110  
C 2.361076 4.567989 -2.444555  
C 0.953224 2.532346 -2.014434  
H 3.075664 2.670361 -1.768714  
H 2.503916 4.293566 -3.501053  
H 1.466277 5.207307 -2.397157  
C 3.228042 5.166878 -2.127943  
H 1.044255 2.156702 -3.045407  
H 0.744696 1.680578 -1.348737  
H 0.055472 3.162341 -1.955719  
C 3.126665 1.970385 4.515422  
C 1.338400 0.762212 3.232242  
H 3.399000 0.927798 2.665177  
H 3.379622 1.072549 5.100207  
H 4.021311 2.607558 4.467519  
H 2.354333 2.514374 5.081490

H 1.482693 -0.150509 3.827583  
H 0.551508 1.363961 3.711013  
H 0.938036 0.476876 2.244461  
C 2.124159 -2.713593 2.553527  
C 3.963374 -4.428812 2.431874  
H 3.995935 -2.472101 1.577749  
H 2.482855 -2.393855 3.544390  
H 1.658766 -1.842342 2.071246  
H 1.333421 -3.465511 2.701031  
H 4.423600 -4.069676 3.365637  
H 3.260064 -5.230782 2.704906  
H 4.755149 -4.876776 1.813163  
C 1.320568 -2.398612 -4.263176  
H 2.051112 -1.121664 -2.729421  
C 3.728328 -1.922176 -3.781680  
H 1.269949 -1.556340 -4.969814  
H 1.605769 -3.292347 -4.841783  
H 0.315404 -2.552103 -3.849703  
H 3.697179 -1.184301 -4.598853  
H 4.455284 -1.567974 -3.042934  
H 4.095170 -2.872391 -4.201467  
C -1.411857 -1.453431 3.001246  
H -3.458083 -0.883184 3.134066  
C -3.098023 -2.348721 4.644400  
H -1.051780 -0.772829 3.786718  
H -0.778283 -2.352242 3.008471  
H -1.232123 -0.943652 2.038508  
H -2.824242 -1.586735 5.391005  
H -4.150485 -2.626264 4.806751  
H -2.482309 -3.239572 4.846620  
C -7.190535 -2.877388 -0.425218  
C -5.561872 -1.432029 -1.668509  
H -5.634027 -3.553127 -1.707997  
H -6.217183 -1.414451 -2.554057  
H -5.820539 -0.565404 -1.046798  
H -4.531192 -1.304869 -2.025095  
H -7.906188 -2.785850 -1.257945  
H -7.366811 -3.841126 0.075751  
H -7.415132 -2.074877 0.291486  
C -2.446442 5.063832 2.195512  
H -3.485778 3.254991 1.769307  
C -1.432384 2.770529 1.983393  
H -2.602458 4.932892 3.277361  
H -1.459044 5.532716 2.067692  
H -3.208011 5.767160 1.823644  
H -1.482960 2.655050 3.077812  
H -1.512663 1.772057 1.529142  
H -0.436782 3.150151 1.721700  
C -2.962809 1.575190 -4.433570  
H -3.527475 0.825520 -2.520288  
C -5.143394 1.989268 -3.247545  
H -5.583379 1.193303 -3.868675  
H -5.659677 1.978001 -2.279234  
H -5.343524 2.956115 -3.736321  
H -3.364576 0.680449 -4.933274  
H -3.145716 2.426809 -5.107607  
H -1.874230 1.453243 -4.330641

176

**(D<sup>IP</sup>PBDI)Mg(H)(Ph)Ca(D<sup>IP</sup>PBDI)**

Ca -1.718846 -0.232599 0.115251  
Mg 1.387817 0.189791 0.278797  
C 0.096956 0.936838 1.880610

C 0.238827 0.459845 3.206004  
C -0.436140 1.028913 4.287114  
C -1.304134 2.104755 4.082187  
C -0.776351 2.036429 1.726991  
C -1.474792 2.611781 2.796806  
H 0.902738 -0.387488 3.409903  
H -0.289593 0.627338 5.294129  
H -1.849846 2.545314 4.920528  
H -0.904221 2.497344 0.735755  
H -2.156285 3.445771 2.626444  
H 0.116231 -0.506531 -0.802278  
N 2.889513 -1.152252 0.709566  
N 2.507099 1.404511 -0.980119  
C 4.743844 -2.601645 -0.235805  
C 5.824676 -2.550548 0.854658  
C 5.463579 -2.791704 -1.581929  
C 3.874660 -3.848458 -0.028407  
C 3.850439 -1.322145 -0.209370  
C 4.104481 -0.381478 -1.221266  
H 4.918665 -0.668650 -1.867934  
C 3.606684 0.918052 -1.530278  
C 4.524317 1.666966 -2.548371  
C 4.063444 3.053796 -3.015114  
C 4.692106 0.808560 -3.819171  
C 5.896815 1.854004 -1.870427  
C 2.823462 -1.764512 1.982119  
C 1.806394 -2.701717 2.292410  
C 1.706710 -3.198436 3.596709  
H 0.928076 -3.929648 3.828020  
C 2.572675 -2.780722 4.600152  
H 2.483919 -3.183568 5.611785  
C 3.542546 -1.826363 4.304341  
H 4.201256 -1.468570 5.098272  
C 3.676456 -1.297949 3.017959  
C 1.891211 2.652325 -1.250767  
C 0.890551 2.743261 -2.250156  
C 0.340424 3.996915 -2.537867  
H -0.399155 4.080771 -3.337994  
C 0.718773 5.135006 -1.833900  
H 0.301166 6.110684 -2.092947  
C 1.608772 5.010949 -0.772548  
H 1.867347 5.892435 -0.180686  
C 2.191808 3.781881 -0.452873  
C 0.399698 1.534642 -3.026975  
C 3.129942 3.696300 0.734555  
C 4.626812 -0.140154 2.775502  
C 0.780643 -3.142235 1.266160  
C 0.841880 1.551925 -4.491011  
C -1.122369 1.416747 -2.939333  
H 0.826372 0.641590 -2.548564  
H 0.467308 0.660557 -5.017610  
H 0.452512 2.438894 -5.016226  
H 1.935663 1.563810 -4.585920  
H -1.478213 0.461278 -3.347912  
H -1.479983 1.491143 -1.901497  
H -1.633719 2.220345 -3.490644  
C 2.369541 3.992827 2.030687  
C 4.346029 4.615059 0.595843  
H 3.496859 2.660889 0.781058  
H 3.034634 3.918209 2.903894  
H 1.951809 5.012067 2.016777  
H 1.535490 3.292348 2.174111  
H 4.051731 5.676669 0.597562

H 5.039976 4.464890 1.438001  
H 4.899362 4.426276 -0.335253  
C -0.590723 -2.562717 1.620012  
H 1.080242 -2.720327 0.296003  
C 0.668660 -4.658331 1.114094  
H -0.034414 -4.904288 0.307055  
H 1.636564 -5.118290 0.876481  
H 0.293113 -5.126393 2.037943  
H -1.304332 -2.766725 0.806019  
H -0.997104 -3.020733 2.534250  
H -0.503715 -1.487716 1.841989  
C 5.939520 -0.232090 3.550521  
H 4.868044 -0.116537 1.704012  
C 3.899152 1.165049 3.099207  
H 6.623548 0.569383 3.231070  
H 5.786576 -0.108796 4.634297  
H 6.446275 -1.194799 3.389833  
H 4.535343 2.035044 2.876962  
H 2.972071 1.259302 2.518156  
H 3.619217 1.205487 4.163622  
N -3.702712 0.979842 -0.337476  
N -2.601543 -1.671181 -1.549910  
C -5.953861 1.350517 -1.258934  
H -5.942098 2.383964 -0.893167  
H -6.578847 0.775558 -0.555205  
H -6.438889 1.313676 -2.242619  
C -4.579600 0.717501 -1.301148  
C -4.384710 -0.209515 -2.347511  
H -5.140417 -0.160426 -3.131204  
C -3.540397 -1.334478 -2.434225  
C -3.809885 -2.251562 -3.606748  
H -2.908985 -2.355854 -4.224848  
H -4.626562 -1.874964 -4.233809  
H -4.061520 -3.266163 -3.264953  
C -4.125739 1.842671 0.706238  
C -3.934388 3.239555 0.601748  
C -4.445630 4.053205 1.619285  
H -4.332079 5.136084 1.547767  
C -5.066523 3.510109 2.741928  
H -5.451282 4.166807 3.525768  
C -5.162659 2.128067 2.876490  
H -5.608860 1.703032 3.778478  
C -4.702681 1.279358 1.866679  
C -2.097242 -2.997347 -1.623803  
C -0.966758 -3.344442 -2.401316  
C -0.605703 -4.695673 -2.485205  
H 0.253833 -4.976815 -3.098888  
C -1.314842 -5.684636 -1.813306  
H -1.021870 -6.732884 -1.907237  
C -2.374768 -5.324342 -0.983701  
H -2.898022 -6.096720 -0.416665  
C -2.767239 -3.989600 -0.858377  
C -0.135237 -2.314946 -3.147435  
C -3.884665 -3.596293 0.095870  
C -4.729903 -0.227996 2.034308  
C -3.130982 3.834083 -0.544545  
C -0.196513 -2.492461 -4.667420  
C 1.323370 -2.336308 -2.686169  
H -0.545701 -1.329325 -2.889445  
H 0.407051 -1.718942 -5.167027  
H 0.206493 -3.471596 -4.971715  
H -1.220155 -2.421527 -5.061091  
H 1.895348 -1.520392 -3.153379

H 1.395106 -2.197141 -1.601100  
H 1.819486 -3.283557 -2.951423  
C -3.911114 -4.451299 1.362114  
C -5.263729 -3.578561 -0.569781  
H -3.677561 -2.555485 0.397883  
H -4.609467 -4.021969 2.096959  
H -4.254161 -5.477489 1.157416  
H -2.917667 -4.517399 1.829371  
H -5.504862 -4.566290 -0.994241  
H -6.043049 -3.326430 0.167031  
H -5.317946 -2.832747 -1.373132  
C -2.400251 5.112078 -0.138592  
H -2.366153 3.082809 -0.801701  
C -3.942020 4.075208 -1.821005  
H -3.314339 4.576447 -2.574495  
H -4.301511 3.138617 -2.265099  
H -4.811689 4.722231 -1.622561  
H -1.702618 5.409095 -0.931503  
H -3.096749 5.950433 0.020452  
H -1.812523 4.975292 0.781144  
C -6.020494 -0.767911 2.643759  
H -4.646216 -0.662880 1.026061  
C -3.507050 -0.676342 2.846379  
H -6.006221 -1.868632 2.660335  
H -6.160141 -0.428715 3.682092  
H -6.898215 -0.447571 2.062940  
H -3.362712 -1.766783 2.804319  
H -2.575612 -0.174656 2.530331  
H -3.611677 -0.387941 3.903390  
H 5.390829 -2.589290 1.860806  
H 6.495857 -3.417601 0.746515  
H 6.434144 -1.638663 0.768439  
H 4.761143 -2.780493 -2.428143  
H 6.240184 -2.033974 -1.761313  
H 5.969264 -3.769177 -1.575251  
H 3.051742 -3.884423 -0.756208  
H 4.487416 -4.753262 -0.162125  
H 3.450111 -3.885985 0.979554  
H 4.816652 3.441055 -3.719033  
H 3.100989 3.033866 -3.537229  
H 3.976751 3.773993 -2.195790  
H 5.261108 1.375664 -4.572035  
H 5.232281 -0.130210 -3.640206  
H 3.716111 0.551560 -4.255949  
H 6.575177 2.403465 -2.542509  
H 5.796707 2.433460 -0.940744  
H 6.367121 0.894952 -1.615379

74

(DIPPBDI)CaH

Ca 0.0001 0.019722 -1.218246  
N 1.464387 -0.002907 0.578792  
N -1.464327 -0.0022 0.578702  
C 2.474475 -0.024144 2.800781  
H 2.188619 -0.028287 3.8595  
H 3.109558 0.853594 2.605252  
H 3.101671 -0.905593 2.596763  
C 1.270631 -0.014653 1.892117  
C 0.000005 -0.018198 2.501469  
H -0.000031 -0.027322 3.591149  
C -1.270593 -0.013235 1.892043  
C -2.474449 -0.020277 2.800721

H -3.108205 0.858247 2.604406  
H -2.188578 -0.023899 3.859438  
H -3.102988 -0.900952 2.597512  
C 2.770533 -0.000459 0.039  
C 3.389774 1.230004 -0.285481  
C 4.633156 1.210275 -0.923478  
H 5.119939 2.153836 -1.182025  
C 5.259068 0.007958 -1.24139  
H 6.230032 0.010902 -1.742081  
C 4.637363 -1.19821 -0.929461  
H 5.127233 -2.138541 -1.193594  
C 3.394027 -1.226999 -0.291894  
C 2.684505 2.542259 0.003779  
H 1.860691 2.319958 0.698789  
C 3.589954 3.57196 0.679178  
H 3.016455 4.471402 0.952448  
H 4.041562 3.164408 1.596158  
C 2.065363 3.111282 -1.277923  
H 1.462817 4.009014 -1.069264  
H 2.844921 3.383014 -2.00673  
C 2.693677 -2.543567 -0.011504  
H 1.8702 -2.329371 0.686395  
C 2.073857 -3.103912 -1.296781  
H 1.476193 -4.005833 -1.091837  
H 1.420529 -2.374879 -1.806488  
C 3.604447 -3.574041 0.655663  
H 3.034023 -4.476852 0.924076  
H 4.422788 -3.89106 -0.009723  
C -2.770549 0.001269 0.03905  
C -3.387716 1.232009 -0.288199  
C -4.631379 1.21294 -0.925721  
H -5.116582 2.156752 -1.186344  
C -5.259495 0.010987 -1.240523  
H -6.23065 0.014423 -1.740841  
C -4.639722 -1.19554 -0.926022  
H -5.131289 -2.135622 -1.187846  
C -3.396221 -1.224979 -0.288861  
C -2.697637 -2.541963 -0.00605  
H -1.875001 -2.327941 0.692879  
C -2.076256 -3.103894 -1.289879  
H -1.421282 -2.375881 -1.798874  
H -1.479863 -4.006287 -1.083311  
C -3.610319 -3.571116 0.660494  
H -4.065082 -3.167733 1.577948  
H -4.427587 -3.888433 -0.006068  
C -2.680218 2.543822 -0.002402  
H -1.854984 2.321413 0.690912  
C -2.06374 3.110625 -1.286388  
H -2.844942 3.383247 -2.013109  
H -1.459023 4.007473 -1.08023  
C -3.582875 3.575267 0.674104  
H -4.032085 3.169471 1.593033  
H -3.007911 4.474706 0.944304  
H -2.85568 -3.368941 -2.021491  
H -3.04095 -4.473976 0.930969  
H -4.404052 3.897909 0.014995  
H -1.417011 2.380932 -1.803785  
H 1.415635 2.383252 -1.793851  
H 4.409427 3.895077 0.018188  
H 2.854226 -3.369338 -2.027258  
H 4.05772 -3.171935 1.574411  
H -0.000859 -0.191849 -3.260959

102  
(DIPPBDI)MgPh  
Mg -0.026024 0.621870 -0.058095  
C 0.011532 2.706440 -0.121675  
C 1.197357 3.427592 -0.368216  
C 1.221062 4.824908 -0.406133  
C 0.045940 5.548388 -0.195300  
C -1.157123 3.468717 0.083439  
C -1.147394 4.865613 0.049789  
H 2.139791 2.892122 -0.530834  
H 2.160318 5.352088 -0.599232  
H 0.059458 6.641657 -0.222566  
H -2.113219 2.964566 0.270584  
H -2.073363 5.425101 0.214174  
N -1.498397 -0.769860 -0.070624  
N 1.483325 -0.732043 0.064823  
C -2.457997 -3.110298 -0.095059  
C -1.984962 -4.569973 -0.165197  
C -3.307290 -2.855920 -1.347989  
C -3.345815 -2.986668 1.152609  
C -1.285076 -2.088582 -0.038789  
C 0.013819 -2.628174 0.038571  
H 0.039530 -3.707064 0.069081  
C 1.305126 -2.043951 0.103694  
C 2.446930 -3.091230 0.260336  
C 2.391359 -4.088826 -0.911929  
C 2.213480 -3.833191 1.591769  
C 3.876186 -2.538522 0.302183  
C -2.724024 -0.055958 -0.001256  
C -3.301288 0.481234 -1.178254  
C -4.417520 1.315995 -1.060170  
H -4.870848 1.729057 -1.964111  
C -4.948039 1.645383 0.182388  
H -5.820248 2.299359 0.252727  
C -4.340856 1.159919 1.337378  
H -4.734186 1.450726 2.313735  
C -3.222951 0.324182 1.271444  
C 2.691004 0.007588 0.008999  
C 3.310760 0.221490 -1.245216  
C 4.421448 1.064458 -1.309090  
H 4.912812 1.233218 -2.269533  
C 4.909529 1.700419 -0.168792  
H 5.782011 2.354267 -0.236189  
C 4.265424 1.516202 1.049544  
H 4.633603 2.036840 1.936734  
C 3.143382 0.687707 1.160251  
C 2.731023 -0.405050 -2.499402  
C 2.437188 0.545713 2.496428  
C -2.496859 -0.079995 2.543287  
C -2.685197 0.242384 -2.546231  
C 3.788100 -0.883923 -3.492061  
C 1.751731 0.569120 -3.160542  
H 2.151197 -1.286136 -2.188061  
H 3.312994 -1.425432 -4.324638  
H 4.352050 -0.046472 -3.931476  
H 4.511589 -1.562029 -3.014235  
H 1.242782 0.105555 -4.019847  
H 0.975948 0.915155 -2.460098  
H 2.273200 1.473352 -3.510534  
C 2.003272 1.906272 3.047809  
C 3.292161 -0.216233 3.512762  
H 1.529889 -0.056068 2.321133  
H 1.419432 1.781736 3.972615

H 2.873992 2.535094 3.290729  
H 1.390188 2.457507 2.319487  
H 4.223192 0.329493 3.734108  
H 2.747195 -0.346790 4.461012  
H 3.572062 -1.213349 3.142919  
C -1.928634 1.492699 -3.009056  
H -1.954184 -0.572974 -2.434032  
C -3.705602 -0.178469 -3.605538  
H -3.194379 -0.435430 -4.546349  
H -4.295257 -1.050439 -3.289641  
H -4.409547 0.637244 -3.833043  
H -1.406238 1.306583 -3.960261  
H -2.622960 2.333982 -3.160743  
H -1.189547 1.834089 -2.268391  
C -3.431801 -0.470717 3.687139  
H -1.874863 -0.954073 2.304049  
C -1.553606 1.042164 2.987522  
H -2.851377 -0.863624 4.536239  
H -4.003830 0.392927 4.060563  
H -4.151801 -1.243003 3.380426  
H -0.952900 0.732939 3.856536  
H -0.857253 1.356642 2.193854  
H -2.118441 1.946440 3.261882  
H 4.562465 -3.382437 0.473411  
H 4.172792 -2.056229 -0.635836  
H 4.032182 -1.814790 1.109505  
H 3.014943 -4.571229 1.753044  
H 2.225998 -3.128622 2.437183  
H 1.252763 -4.364605 1.613826  
H 3.210376 -4.818468 -0.814279  
H 1.448330 -4.649662 -0.952914  
H 2.517302 -3.570451 -1.874697  
H -3.857864 -2.019026 1.198072  
H -4.119020 -3.770534 1.129589  
H -2.759362 -3.119906 2.073775  
H -1.430711 -4.876114 0.733993  
H -2.868211 -5.222034 -0.239871  
H -1.357031 -4.762053 -1.047408  
H -3.821407 -1.890368 -1.301166  
H -2.691637 -2.883227 -2.259378  
H -4.077579 -3.637654 -1.436553

148

**[(D<sup>1</sup>PPBDI)CaH]<sub>2</sub>**

Ca 1.606479 0.420818 -0.266012  
N 2.734621 2.421222 -0.583764  
N 3.787149 -0.290803 -0.606583  
C 4.318104 4.132601 -1.335200  
H 5.405880 4.265362 -1.391400  
H 3.906904 4.813315 -0.576570  
H 3.887349 4.440157 -2.301795  
C 3.944966 2.697731 -1.047313  
C 4.928550 1.717972 -1.301342  
H 5.880387 2.090703 -1.679933  
C 4.876341 0.336481 -1.029584  
C 6.147304 -0.456729 -1.203502  
H 6.461306 -0.880997 -0.237331  
H 6.964116 0.158696 -1.599766  
H 5.983029 -1.312039 -1.875755  
C 1.842446 3.431624 -0.167323  
C 1.743381 3.703242 1.222477  
C 0.823581 4.662301 1.653572  
H 0.753409 4.898861 2.716781

C -0.013334 5.314937 0.752090  
H -0.729782 6.058381 1.108653  
C 0.052616 5.001338 -0.600898  
H -0.628626 5.491340 -1.299861  
C 0.971940 4.065656 -1.084460  
C 2.645984 2.980577 2.207901  
H 2.874962 1.994874 1.766813  
C 3.990392 3.697028 2.365615  
H 4.640213 3.153251 3.069605  
H 4.523710 3.769891 1.408434  
C 1.987427 2.738358 3.562724  
H 2.649883 2.139830 4.204785  
H 1.787045 3.679152 4.098794  
C 0.993030 3.716762 -2.560143  
H 1.882125 3.092190 -2.736078  
C -0.236692 2.881809 -2.927864  
H -0.231531 2.618558 -3.997734  
H -0.275906 1.941199 -2.355907  
C 1.109871 4.955497 -3.450238  
H 1.229944 4.663698 -4.505314  
H 0.209592 5.586913 -3.386154  
C 3.803600 -1.651472 -0.232864  
C 3.998883 -1.994395 1.127871  
C 3.859757 -3.331282 1.513227  
H 4.007921 -3.603636 2.561545  
C 3.535387 -4.318334 0.587372  
H 3.426148 -5.357361 0.906741  
C 3.350240 -3.974197 -0.748601  
H 3.092039 -4.750010 -1.472687  
C 3.482701 -2.652790 -1.182254  
C 3.265134 -2.300656 -2.641648  
H 3.567675 -1.250295 -2.769728  
C 1.784815 -2.405041 -3.014879  
H 1.150319 -1.754833 -2.390623  
H 1.621752 -2.117382 -4.065750  
C 4.131334 -3.148383 -3.575452  
H 5.196249 -3.089357 -3.303324  
H 3.839872 -4.210303 -3.547779  
C 4.346764 -0.935280 2.157679  
H 4.465055 0.015968 1.616691  
C 3.217776 -0.752492 3.174363  
H 3.029799 -1.682017 3.734026  
H 3.473395 0.031171 3.903211  
C 5.675977 -1.233881 2.854796  
H 6.491133 -1.362724 2.126949  
H 5.951974 -0.410759 3.532588  
Ca -1.606789 -0.421074 0.265056  
N -2.735015 -2.421174 0.584110  
N -3.787337 0.290701 0.605903  
C -4.318550 -4.132356 1.335966  
H -5.406383 -4.265394 1.390487  
H -3.905875 -4.813584 0.578609  
H -3.889377 -4.438904 2.303593  
C -3.945400 -2.697596 1.047548  
C -4.929015 -1.717746 1.301111  
H -5.880926 -2.090318 1.679679  
C -4.876623 -0.336327 1.029049  
C -6.147443 0.457126 1.202871  
H -6.461269 0.881526 0.236701  
H -6.964417 -0.158146 1.599038  
H -5.983049 1.312362 1.875192  
C -1.842537 -3.431479 0.168140  
C -1.743074 -3.703350 -1.221591



C -0.822800 -4.662126 -1.652299  
H -0.752322 -4.898879 -2.715445  
C 0.014160 -5.314267 -0.750503  
H 0.730989 -6.057487 -1.106759  
C -0.052255 -5.000477 0.602418  
H 0.629004 -5.490109 1.301629  
C -0.972037 -4.065049 1.085601  
C -2.645924 -2.981421 -2.207319  
H -2.875818 -1.995859 -1.766380  
C -3.989721 -3.698977 -2.365268  
H -4.639905 -3.155706 -3.069313  
H -4.523087 -3.772366 -1.408150  
C -1.987217 -2.738809 -3.562000  
H -2.650035 -2.140955 -4.204318  
H -1.785852 -3.679497 -4.097883  
C -0.993655 -3.715944 2.561223  
H -1.882755 -3.091256 2.736718  
C 0.236002 -2.881042 2.929281  
H 0.230398 -2.617513 3.999080  
H 0.275560 -1.940611 2.357058  
C -1.110984 -4.954561 3.451413  
H -1.231317 -4.662639 4.506425  
H -0.210805 -5.586153 3.387647  
C -3.803531 1.651354 0.232124  
C -3.998754 1.994281 -1.128625  
C -3.859432 3.331141 -1.514002  
H -4.007569 3.603504 -2.562321  
C -3.534838 4.318148 -0.588178  
H -3.425418 5.357148 -0.907570  
C -3.349679 3.974000 0.747790  
H -3.091268 4.749777 1.471839  
C -3.482417 2.652633 1.181483  
C -3.264941 2.300488 2.640889  
H -3.567688 1.250188 2.768983  
C -1.784612 2.404588 3.014161  
H -1.150226 1.754210 2.389971  
H -1.621667 2.116948 4.065056  
C -4.131003 3.148411 3.574643  
H -5.195926 3.089555 3.302509  
H -3.839356 4.210278 3.546921  
C -4.346742 0.935201 -2.158430  
H -4.465236 -0.016014 -1.617425  
C -3.217705 0.752203 -3.175026  
H -3.029583 1.681672 -3.734740  
H -3.473367 -0.031481 -3.903838  
C -5.675847 1.234007 -2.855665  
H -6.491047 1.362991 -2.127892  
H -5.951919 0.410921 -3.533472  
H 1.414829 -3.432299 -2.879462  
H 4.025874 -2.806259 -4.616887  
H 5.619903 -2.154592 3.457213  
H 2.268225 -0.467077 2.693497  
H 1.038948 2.194371 3.451836  
H 3.844077 4.717873 2.753759  
H -1.166714 3.430771 -2.713160  
H 1.971870 5.578027 -3.166142  
H -1.414392 3.431756 2.878707  
H -4.025613 2.806317 4.616096  
H -5.619571 2.154698 -3.458091  
H -2.268204 0.466719 -2.694095  
H -3.842488 -4.719677 -2.753443  
H -1.039255 -2.193955 -3.450924  
H 1.166057 -3.430186 2.715158

H -1.973017 -5.576949 3.167114  
H 0.200750 0.126168 1.354671  
H -0.201048 -0.126430 -1.355709

176

**TS addition to Mg-Ca bond**

Ca -1.888492 -0.282484 0.135815  
Mg 1.421269 0.175622 0.211158  
C 0.138996 0.971672 2.475067  
C 0.170983 0.214493 3.666956  
C -0.715910 0.474842 4.716922  
C -1.644759 1.515400 4.622412  
C -0.840369 1.983499 2.396224  
C -1.696983 2.285869 3.453754  
H 0.912872 -0.580007 3.794427  
H -0.671241 -0.132653 5.627054  
H -2.333835 1.719728 5.445946  
H -0.938201 2.540930 1.452024  
H -2.422284 3.097204 3.360276  
H 0.002874 0.364503 1.166903  
N 2.790821 -1.262242 0.720235  
N 2.632567 1.308658 -1.003937  
C 4.607454 -2.812033 -0.144377  
C 5.681852 -2.795168 0.953359  
C 5.326100 -3.063831 -1.482015  
C 3.674690 -4.008705 0.076282  
C 3.782105 -1.486864 -0.153756  
C 4.140141 -0.562609 -1.153437  
H 4.975116 -0.895801 -1.748597  
C 3.738516 0.761771 -1.488489  
C 4.769529 1.475743 -2.420720  
C 4.360141 2.836693 -3.000672  
C 5.119985 0.581032 -3.628387  
C 6.038650 1.695969 -1.572666  
C 2.666417 -1.857487 2.000402  
C 1.606412 -2.744400 2.315697  
C 1.511690 -3.258376 3.614592  
H 0.705144 -3.957162 3.849828  
C 2.409725 -2.894930 4.609523  
H 2.320102 -3.310290 5.615869  
C 3.405980 -1.967854 4.315372  
H 4.084104 -1.641277 5.105988  
C 3.543012 -1.428574 3.034192  
C 2.091164 2.580880 -1.323937  
C 1.097690 2.673206 -2.329336  
C 0.638878 3.940541 -2.702071  
H -0.086576 4.026341 -3.513528  
C 1.089532 5.091098 -2.062744  
H 0.734819 6.073954 -2.381678  
C 1.954732 4.972212 -0.980028  
H 2.256635 5.867071 -0.430773  
C 2.451249 3.728057 -0.580648  
C 0.547362 1.443278 -3.027868  
C 3.332615 3.639656 0.648761  
C 4.528507 -0.298328 2.797140  
C 0.533457 -3.137257 1.316730  
C 1.236234 1.183057 -4.366818  
C -0.969183 1.508414 -3.195092  
H 0.758180 0.583030 -2.369413  
H 0.805387 0.299435 -4.861586  
H 1.117327 2.041775 -5.047127  
H 2.311532 1.005077 -4.236254  
H -1.355819 0.566318 -3.607935

H -1.475398 1.679112 -2.233162  
H -1.283826 2.310494 -3.879468  
C 2.484161 3.894659 1.899263  
C 4.532808 4.586938 0.598509  
H 3.716932 2.610113 0.702499  
H 3.097790 3.845119 2.811264  
H 2.021630 4.893611 1.858198  
H 1.677548 3.153325 1.997489  
H 4.218890 5.641768 0.641646  
H 5.196786 4.409846 1.459109  
H 5.124408 4.454058 -0.319202  
C -0.827302 -2.586740 1.758604  
H 0.789021 -2.668545 0.353853  
C 0.412856 -4.646564 1.102885  
H -0.348778 -4.858726 0.340574  
H 1.358415 -5.092795 0.771644  
H 0.109487 -5.156180 2.031098  
H -1.574520 -2.761133 0.963843  
H -1.200989 -3.105370 2.654832  
H -0.748173 -1.524293 2.039244  
C 5.831002 -0.421388 3.585260  
H 4.783106 -0.284601 1.728538  
C 3.834420 1.027869 3.113058  
H 6.538424 0.359868 3.266719  
H 5.670958 -0.284947 4.666362  
H 6.314774 -1.397850 3.437012  
H 4.488168 1.879029 2.869719  
H 2.892533 1.137878 2.555732  
H 3.574925 1.087396 4.181708  
N -3.627489 1.174607 -0.441572  
N -2.677752 -1.490546 -1.702857  
C -5.678767 1.909952 -1.574270  
H -5.532419 2.928215 -1.193415  
H -6.447528 1.445114 -0.934854  
H -6.072103 1.953019 -2.597666  
C -4.419780 1.075044 -1.503031  
C -4.236400 0.166907 -2.571485  
H -4.896234 0.339407 -3.421582  
C -3.494860 -1.027084 -2.649832  
C -3.693276 -1.838103 -3.909644  
H -4.558893 -1.487840 -4.484555  
H -3.816036 -2.907455 -3.687012  
H -2.800801 -1.749585 -4.548086  
C -4.034112 2.041018 0.607280  
C -3.600078 3.385044 0.633235  
C -4.115130 4.223690 1.628557  
H -3.815159 5.272489 1.652148  
C -4.981510 3.743096 2.607754  
H -5.371845 4.418877 3.372306  
C -5.302141 2.388591 2.640972  
H -5.925282 2.000803 3.449737  
C -4.830044 1.521030 1.653697  
C -2.266069 -2.847340 -1.752470  
C -1.113084 -3.270704 -2.453701  
C -0.798536 -4.635456 -2.466891  
H 0.084337 -4.972037 -3.015952  
C -1.585148 -5.569989 -1.804016  
H -1.326672 -6.630786 -1.838084  
C -2.686150 -5.140097 -1.066312  
H -3.281356 -5.872029 -0.517203  
C -3.032296 -3.787959 -1.012091  
C -0.216160 -2.301668 -3.201201  
C -4.219194 -3.322271 -0.185894

C -5.044865 0.022355 1.747554  
C -2.555664 3.886029 -0.351216  
C -0.104634 -2.654099 -4.687161  
C 1.173387 -2.227204 -2.566739  
H -0.675294 -1.306312 -3.112198  
H 0.466151 -1.883061 -5.226881  
H 0.421436 -3.610603 -4.832794  
H -1.090933 -2.746499 -5.164520  
H 1.817931 -1.505397 -3.089178  
H 1.107291 -1.910315 -1.514421  
H 1.680080 -3.204626 -2.589864  
C -4.435674 -4.149976 1.079080  
C -5.505442 -3.246791 -1.013334  
H -3.995640 -2.286320 0.123126  
H -5.200942 -3.679820 1.715228  
H -4.793015 -5.165767 0.849059  
H -3.511011 -4.245347 1.667768  
H -5.761348 -4.236784 -1.423316  
H -6.347546 -2.906807 -0.389754  
H -5.407468 -2.542202 -1.849315  
C -1.696924 5.006546 0.232667  
H -1.886252 3.029774 -0.550429  
C -3.134566 4.312092 -1.702830  
H -2.337032 4.728610 -2.336548  
H -3.579760 3.468514 -2.245827  
H -3.906232 5.088144 -1.573579  
H -0.828564 5.181727 -0.415226  
H -2.255145 5.953514 0.306915  
H -1.320651 4.754162 1.234941  
C -6.422503 -0.393163 2.253379  
H -4.941515 -0.382432 0.728504  
C -3.932597 -0.585328 2.618332  
H -6.529186 -1.488490 2.225855  
H -6.591090 -0.080159 3.295536  
H -7.220765 0.043967 1.635174  
H -3.872350 -1.679575 2.515301  
H -2.941171 -0.137809 2.423584  
H -4.098458 -0.353929 3.681495  
H 5.238726 -2.797254 1.956159  
H 6.312484 -3.694150 0.863254  
H 6.333491 -1.913873 0.858211  
H 4.635328 -3.011269 -2.336309  
H 6.155695 -2.364358 -1.660452  
H 5.763680 -4.073326 -1.460835  
H 2.850611 -4.006520 -0.651424  
H 4.237954 -4.946171 -0.048845  
H 3.247008 -4.013915 1.083446  
H 5.170426 3.180033 -3.662472  
H 3.441830 2.789234 -3.597052  
H 4.214964 3.603278 -2.234380  
H 5.771080 1.141834 -4.315939  
H 5.657835 -0.335526 -3.354053  
H 4.219174 0.285582 -4.185918  
H 6.801048 2.225090 -2.166555  
H 5.816003 2.305944 -0.685493  
H 6.466554 0.745123 -1.226186

212

(<sup>D</sup>IPePBDI\*)Mg-Ca(<sup>D</sup>IPePBDI) (1)

Ca -1.871127 0.012818 0.164997  
Mg 1.502961 -0.057727 -0.076731  
N 3.103894 1.286800 0.444438  
N 2.978729 -1.488257 -0.752769

N -3.794687 -1.295206 0.688364  
N -3.656119 1.507497 -0.347039  
C 4.404411 1.063147 0.268056  
C 4.891493 -0.107580 -0.345674  
H 5.967796 -0.115045 -0.442164  
C 4.291626 -1.299774 -0.804125  
C 5.579734 2.004868 0.727212  
C 6.390664 1.261401 1.806762  
H 5.764156 1.011550 2.672949  
H 7.213570 1.902179 2.161741  
H 6.824997 0.325731 1.430350  
C 5.201499 3.371528 1.313827  
H 4.566324 3.964424 0.648837  
H 6.130626 3.939223 1.478887  
H 4.687684 3.296020 2.275987  
C 6.516411 2.296410 -0.465623  
H 6.988186 1.394604 -0.875980  
H 7.324971 2.966077 -0.133944  
H 5.984610 2.796541 -1.287092  
C 5.366343 -2.317030 -1.344290  
C 4.873432 -3.693881 -1.812852  
H 4.277873 -4.223723 -1.060077  
H 5.758231 -4.312238 -2.031143  
H 4.277603 -3.647220 -2.728788  
C 6.413753 -2.593584 -0.244895  
H 6.918730 -1.685321 0.106723  
H 7.185984 -3.270231 -0.642758  
H 5.960664 -3.080353 0.627692  
C 6.092751 -1.670291 -2.542105  
H 5.395236 -1.427420 -3.356765  
H 6.840727 -2.373007 -2.942384  
H 6.613711 -0.744051 -2.265454  
C 2.539703 2.396640 1.110829  
C 2.484401 2.427638 2.526936  
C 1.923739 3.543265 3.156326  
H 1.919564 3.599834 4.246269  
C 1.380240 4.588099 2.415227  
H 0.954949 5.458044 2.921151  
C 1.356500 4.505781 1.025977  
H 0.891665 5.311184 0.456949  
C 1.921696 3.420131 0.347185  
C 3.008022 1.261418 3.338098  
H 3.696576 0.702667 2.689543  
C 3.805723 1.681934 4.578269  
H 4.583010 2.398883 4.265735  
H 3.163359 2.235471 5.282301  
C 4.455950 0.513594 5.307503  
H 3.708302 -0.167303 5.742306  
H 5.097505 0.864785 6.130103  
H 5.082841 -0.084200 4.626516  
C 1.868886 0.279008 3.660629  
H 1.340477 0.038863 2.717308  
H 2.314862 -0.669104 3.994610  
C 0.857915 0.747778 4.691720  
H 0.063489 0.000768 4.814597  
H 0.377300 1.692333 4.397879  
H 1.316279 0.902701 5.680927  
C 1.933198 3.358620 -1.172006  
H 1.785912 2.295160 -1.442385  
C 0.786878 4.143097 -1.814428  
H -0.166525 3.727169 -1.451616  
H 0.800406 5.191092 -1.475608  
C 0.805090 4.143322 -3.334668

H 0.778462 3.121778 -3.738859  
H 1.702057 4.635594 -3.738942  
H -0.067680 4.676726 -3.733931  
C 3.306790 3.750090 -1.740969  
H 4.059651 3.110374 -1.266629  
H 3.338538 3.485913 -2.810050  
C 3.677339 5.214622 -1.559194  
H 3.023302 5.880152 -2.143780  
H 4.712740 5.404424 -1.881902  
H 3.595316 5.522660 -0.504812  
C 2.287845 -2.649915 -1.156935  
C 1.782355 -3.513193 -0.154011  
C 1.103651 -4.670521 -0.551477  
H 0.718137 -5.356477 0.202853  
C 0.920149 -4.969669 -1.897459  
H 0.409646 -5.890688 -2.189553  
C 1.359892 -4.076679 -2.871473  
H 1.188874 -4.313144 -3.921848  
C 2.012817 -2.891799 -2.526490  
C 2.034775 -3.198630 1.310937  
H 1.969517 -2.098523 1.406527  
C 0.950213 -3.776369 2.218213  
H -0.023608 -3.414215 1.854770  
H 0.924280 -4.873707 2.110647  
C 1.092944 -3.450353 3.695836  
H 0.256145 -3.876263 4.268575  
H 1.094685 -2.365416 3.871243  
H 2.020650 -3.859938 4.123756  
C 3.463700 -3.590881 1.749323  
H 3.424319 -4.555016 2.286662  
H 4.070643 -3.786570 0.856064  
C 4.167180 -2.536123 2.592740  
H 3.621456 -2.320409 3.521443  
H 4.259293 -1.592795 2.031209  
H 5.182666 -2.854940 2.875359  
C -6.103357 -2.180640 0.750302  
H -5.654747 -3.077584 1.194704  
H -6.577369 -2.467262 -0.201371  
H -6.907937 -1.820909 1.408197  
C -5.088716 -1.080028 0.511512  
C -5.629037 0.144270 0.079055  
H -6.717395 0.172237 0.019124  
C -4.977816 1.322699 -0.322651  
C -5.890989 2.451171 -0.746180  
H -5.569966 2.900529 -1.695636  
H -5.860942 3.259600 -0.004168  
H -6.928411 2.109453 -0.843916  
C -3.318024 -2.577068 1.027830  
C -3.154884 -3.557657 0.017015  
C -2.563581 -4.773354 0.373951  
H -2.392696 -5.534931 -0.387231  
C -2.205158 -5.043956 1.691467  
H -1.761395 -6.008279 1.948600  
C -2.403251 -4.084247 2.679324  
H -2.124723 -4.312930 3.708538  
C -2.933453 -2.829133 2.367678  
C -3.664598 -3.288480 -1.394753  
H -4.685736 -2.889929 -1.284794  
C -3.796192 -4.544699 -2.263061  
H -4.017138 -4.214228 -3.291964  
H -2.828413 -5.068944 -2.330791  
C -4.891203 -5.501418 -1.807634  
H -4.953191 -6.382755 -2.464358

H -5.874700 -5.004768 -1.823789  
H -4.724744 -5.859416 -0.780775  
C -2.877060 -2.187893 -2.124941  
H -3.329457 -2.046251 -3.120563  
H -3.083465 -1.232587 -1.612357  
C -1.391531 -2.453125 -2.262820  
H -1.201477 -3.322651 -2.904915  
H -0.906574 -2.663877 -1.295594  
H -0.859219 -1.599510 -2.703390  
C -3.183568 -1.773294 3.429898  
H -3.060863 -0.792301 2.934974  
C -4.648132 -1.801731 3.911395  
H -4.812452 -0.945141 4.584788  
H -5.299248 -1.617045 3.047988  
C -5.069955 -3.090498 4.601148  
H -6.128510 -3.047668 4.900095  
H -4.480792 -3.283310 5.511718  
H -4.944865 -3.959983 3.937244  
C -2.179821 -1.820933 4.585686  
H -2.225765 -2.796356 5.096565  
H -1.165882 -1.758893 4.160220  
C -2.374228 -0.719256 5.618593  
H -3.317629 -0.834898 6.172873  
H -2.386529 0.276968 5.147240  
H -1.560490 -0.724427 6.359027  
C -3.203367 2.747054 -0.866525  
C -2.862039 2.818124 -2.241000  
C -2.538505 4.066288 -2.780841  
H -2.324148 4.150567 -3.846518  
C -2.467320 5.202937 -1.980990  
H -2.198757 6.166138 -2.420772  
C -2.709370 5.100945 -0.615143  
H -2.618091 5.990479 0.011888  
C -3.096240 3.888226 -0.034803  
C -2.894975 1.569728 -3.109289  
H -2.732328 0.712851 -2.433500  
C -1.745153 1.539040 -4.126810  
H -1.754479 2.446760 -4.750373  
H -0.803533 1.579415 -3.555670  
C -1.730620 0.322922 -5.041584  
H -2.581357 0.317532 -5.739622  
H -1.765048 -0.615995 -4.469119  
H -0.812833 0.306058 -5.648009  
C -4.279184 1.314490 -3.733756  
H -4.244781 0.348886 -4.263599  
H -5.005730 1.167436 -2.921701  
C -4.770963 2.400532 -4.678639  
H -5.755066 2.141258 -5.098242  
H -4.081875 2.550233 -5.525187  
H -4.872636 3.368184 -4.163416  
C -3.364683 3.811926 1.459716  
H -3.997831 2.927533 1.640864  
C -2.050716 3.612128 2.233823  
H -1.391564 4.473010 2.037940  
H -2.271425 3.633790 3.314825  
C -1.290938 2.344111 1.905006  
H -1.027046 2.305469 0.833724  
H -1.878980 1.455417 2.204664  
H -0.332042 2.289413 2.434535  
C -4.082685 5.043133 2.032394  
H -4.205849 4.877001 3.116075  
H -3.414000 5.917969 1.953856  
C -5.433627 5.379365 1.421573

H -6.164084 4.573882 1.596051  
H -5.359078 5.538988 0.335056  
H -5.849097 6.297042 1.865559  
C 2.504583 -1.898510 -3.563383  
C 2.745690 -2.490983 -4.965286  
H 3.486162 -1.564455 -3.203009  
C 1.641695 -0.630799 -3.603063  
H 3.536125 -1.900165 -5.457444  
H 3.173751 -3.500547 -4.849252  
C 1.542420 -2.543662 -5.903175  
C 2.347182 0.549033 -4.250102  
H 0.691958 -0.844595 -4.114314  
H 1.347368 -0.356700 -2.574407  
H 1.701642 1.437881 -4.273355  
H 3.255523 0.813971 -3.685462  
H 2.648340 0.334818 -5.287516  
H 1.789268 -3.097256 -6.822248  
H 0.668123 -3.030495 -5.445895  
H 1.221633 -1.536088 -6.208031

224

**(DIPePBDI\*)Mg(C<sub>6</sub>H<sub>6</sub>)Ca(DIPePBDI) (3)**

N 3.476444 -1.362351 -0.616447  
N -4.379484 -1.182831 0.670239  
C 4.787959 -1.195322 -0.475749  
C 5.892906 -2.243470 -0.849185  
C 2.809391 -2.416222 -1.289055  
C 2.347627 -2.171501 -2.610591  
C 1.642405 -3.181153 -3.270731  
H 1.307685 -3.023565 -4.296540  
C 1.338817 -4.383358 -2.638222  
H 0.781695 -5.158383 -3.169189  
C 1.721292 -4.576906 -1.317427  
H 1.450899 -5.506871 -0.812541  
C 2.462928 -3.613823 -0.623810  
C 2.596718 -0.825764 -3.273433  
H 2.440113 -0.067705 -2.485529  
C 1.571964 -0.522996 -4.370673  
H 1.711919 -1.226988 -5.209337  
H 0.567963 -0.727210 -3.969097  
C 4.051998 -0.658959 -3.763413  
H 4.090377 -0.850781 -4.850594  
C 4.671150 0.693716 -3.437082  
C 2.860365 -3.901516 0.814672  
H 3.690264 -3.226380 1.076073  
C 1.671858 -3.542991 1.724039  
H 1.488973 -2.464198 1.617453  
H 0.771395 -4.035882 1.320408  
C 3.342560 -5.357726 0.999767  
H 3.735011 -5.733384 0.040939  
C 4.418157 -5.551294 2.061866  
C -5.695459 -1.105171 0.558827  
C -6.575665 -2.197029 1.126149  
C -3.691359 -2.252420 1.265823  
C -3.042414 -2.021552 2.507466  
C -2.194264 -3.011057 3.012721  
H -1.681509 -2.849906 3.961629  
C -1.991112 -4.203959 2.324537  
H -1.322741 -4.963602 2.735236  
C -2.642525 -4.427239 1.113356  
H -2.476050 -5.366827 0.583727  
C -3.492286 -3.465936 0.559376  
C -3.310177 -0.728590 3.258946

H -3.325151 0.090818 2.513227  
C -2.222150 -0.377023 4.275291  
H -2.204448 -1.124744 5.084911  
H -1.247473 -0.457762 3.772771  
C -4.724659 -0.725272 3.873179  
C -4.969742 -1.823533 4.897078  
H -4.908689 0.261800 4.327285  
C -4.148347 -3.672547 -0.790885  
H -5.039413 -3.031360 -0.822211  
C -3.252453 -3.161590 -1.933931  
H -3.016158 -2.101936 -1.731797  
C -1.961111 -3.923158 -2.162975  
C -4.642109 -5.108925 -1.000358  
H -5.236740 -5.395174 -0.116562  
C -5.478206 -5.289693 -2.260062  
Mg 2.031631 0.011944 0.045440  
Ca -2.587909 0.080911 -0.093344  
N 3.497705 1.356016 0.734618  
N -4.460038 1.243206 -0.830575  
C 5.343485 -0.033004 0.101077  
H 6.423376 -0.057776 0.134419  
C 4.807409 1.152974 0.645860  
C 5.930940 2.151217 1.102142  
C 2.829367 2.482894 1.268524  
C 2.213339 2.350804 2.539550  
C 1.466835 3.426521 3.030025  
H 1.000393 3.357350 4.013178  
C 1.291294 4.586730 2.280973  
H 0.699127 5.412692 2.681615  
C 1.860321 4.684281 1.015574  
H 1.711308 5.593885 0.431443  
C 2.634371 3.646419 0.486452  
C 2.326369 1.040440 3.303897  
H 2.062204 0.252360 2.573648  
C 1.301331 0.921152 4.432453  
H 1.510325 1.682900 5.204315  
H 0.307263 1.164716 4.028008  
C 3.756940 0.723142 3.791024  
H 4.459717 1.424124 3.328431  
H 3.823805 0.922398 4.875282  
C 3.261284 3.768094 -0.889494  
H 4.123143 3.087440 -0.903664  
C 2.327625 3.244016 -1.990657  
H 2.040445 2.214033 -1.728624  
C 1.075581 4.064678 -2.241101  
C 3.800811 5.174423 -1.183022  
C 4.576932 5.273908 -2.489615  
H 2.976825 5.906161 -1.200019  
C -6.350776 -0.033612 -0.079100  
H -7.441598 -0.069555 -0.080632  
C -5.767129 1.080810 -0.715146  
C -6.724459 2.092692 -1.303672  
C -3.844400 2.370077 -1.395689  
C -3.156305 2.204607 -2.626757  
C -2.425259 3.279481 -3.136579  
H -1.894155 3.172907 -4.083233  
C -2.364283 4.491605 -2.454107  
H -1.786603 5.321333 -2.866401  
C -3.024961 4.639216 -1.237444  
H -2.955626 5.589862 -0.706124  
C -3.764229 3.591562 -0.680626  
C -3.279167 0.880782 -3.360108  
H -3.209867 0.075276 -2.601565

C -2.147764 0.633501 -4.359091  
H -2.217577 1.369751 -5.177952  
H -1.189103 0.826936 -3.853166  
C -4.688447 0.725328 -3.989390  
H -5.341642 1.519377 -3.600775  
H -4.609972 0.919113 -5.073497  
C -4.420678 3.716060 0.679912  
H -5.286926 3.039614 0.690970  
C -3.483990 3.192994 1.786712  
H -3.205678 2.155639 1.530508  
C -2.220893 4.003347 2.018727  
C -4.966558 5.120503 0.961061  
H -5.577701 5.427161 0.095612  
C -5.800288 5.208713 2.232157  
H 2.474606 -6.000847 1.228910  
H 4.669974 -1.445881 -3.312922  
C 1.607652 0.896187 -4.917036  
H 4.449285 5.482805 -0.345829  
H 2.905454 3.160535 -2.923983  
C 4.207232 -0.698340 3.482709  
C 1.246114 -0.448185 5.093077  
C -5.350102 -0.622807 -3.737694  
C -2.129026 -0.767394 -4.951953  
H -4.143743 5.851913 1.017872  
C 1.797991 -3.881484 3.200598  
H -4.055931 3.103725 2.724471  
C -2.363092 1.011131 4.881273  
H -5.455768 -0.808920 3.058451  
H -3.792420 -5.810838 -1.026006  
H -3.845552 -3.142480 -2.861113  
C -0.359988 -1.352526 0.054840  
C 0.106522 -0.523428 1.195853  
C -0.372044 0.885885 1.117099  
C -0.317715 1.477104 -0.114501  
C -0.314086 -0.762367 -1.177095  
C 0.189030 0.637276 -1.225275  
H 0.011282 -0.994403 2.177273  
H -0.668581 1.442801 2.009718  
H -0.590865 2.524219 -0.271545  
H -0.553429 -1.315192 -2.089312  
H 0.176985 1.107514 -2.210930  
H -0.671114 -2.390478 0.197666  
H -1.383086 -3.479408 -2.985529  
H -1.309493 -3.911389 -1.278571  
H -2.147108 -4.975576 -2.428530  
H -5.897428 -6.305811 -2.316571  
H -6.320471 -4.578895 -2.285562  
H -4.886379 -5.129482 -3.174292  
H 5.710958 0.756900 -3.794202  
H 4.113826 1.523057 -3.893391  
H 4.684993 0.859046 -2.348654  
H 0.797254 1.053834 -5.645263  
H 1.483674 1.636604 -4.113742  
H 2.554626 1.118160 -5.431397  
H 5.036830 6.267537 -2.603272  
H 5.385187 4.526271 -2.535570  
H 3.930960 5.109825 -3.365433  
H 0.439510 3.581794 -2.996507  
H 0.467953 4.170090 -1.331120  
H 1.307225 5.077984 -2.606830  
H -6.350654 -0.665248 -4.195500  
H -4.761160 -1.453146 -4.152384  
H -5.469351 -0.803048 -2.657687

H -1.262182 -0.900201 -5.615754  
H -2.062774 -1.533377 -4.164052  
H -3.031426 -0.977480 -5.545531  
H -1.523779 1.233246 5.556297  
H -2.373607 1.786386 4.100077  
H -3.288587 1.118772 5.466682  
H -6.005274 -1.789937 5.268704  
H -4.801673 -2.820355 4.460208  
H -4.305695 -1.730563 5.770763  
H -6.252310 6.206186 2.342299  
H -6.618640 4.470214 2.224847  
H -5.197460 5.022516 3.134300  
H -1.590198 3.544438 2.793374  
H -1.607328 4.072919 1.109288  
H -2.447853 5.028593 2.349876  
H 5.228438 -0.890148 3.847015  
H 3.544857 -1.444137 3.942607  
H 4.206922 -0.876262 2.396401  
H 0.437697 -0.493179 5.838337  
H 1.062791 -1.240795 4.352535  
H 2.183143 -0.693481 5.614763  
H 4.666048 -6.617649 2.181593  
H 5.345141 -5.029680 1.781400  
H 4.113477 -5.169091 3.045494  
H 1.872437 -4.965225 3.378746  
H 2.677505 -3.404287 3.658505  
H 0.910112 -3.525267 3.744898  
C 6.907391 1.443904 2.066238  
C 6.725397 2.583853 -0.146380  
C 5.474194 3.430002 1.816728  
C 6.975249 -1.609251 -1.745734  
C 6.554440 -2.682776 0.473193  
C 5.429379 -3.513538 -1.572981  
H 7.522945 3.285355 0.145676  
H 7.191640 1.730710 -0.657133  
H 6.081771 3.095322 -0.874846  
H 7.687896 2.156788 2.374234  
H 6.399102 1.092046 2.973498  
H 7.412296 0.581793 1.612413  
H 6.372503 3.975934 2.144937  
H 4.902410 4.099571 1.169172  
H 4.862392 3.234864 2.705669  
H 7.768425 -2.350549 -1.929605  
H 6.567951 -1.309467 -2.720137  
H 7.448285 -0.726729 -1.297173  
H 7.268223 -3.500310 0.283156  
H 7.098806 -1.861042 0.957256  
H 5.804298 -3.045814 1.188738  
H 6.322978 -4.101225 -1.835554  
H 4.793358 -4.148028 -0.950602  
H 4.882539 -3.307270 -2.501195  
H -7.437126 -1.765944 1.655767  
H -6.976329 -2.823706 0.313149  
H -6.022038 -2.850795 1.812894  
H -7.395681 2.488768 -0.526532  
H -6.197837 2.934101 -1.771699  
H -7.359282 1.608706 -2.061684

224

(DIPePBDI\*)Mg(C<sub>6</sub>H<sub>6</sub>)Ca(DIPePBDI) (3')

N -4.236789 1.178731 -0.801397  
N 3.325889 1.635522 0.055775  
C -5.549531 1.142361 -0.650004

C -6.401745 2.274064 -1.176222  
C -3.568005 2.196937 -1.500822  
C -3.085258 1.915550 -2.808625  
C -2.322955 2.886972 -3.461258  
H -1.956052 2.696538 -4.470692  
C -2.010738 4.097546 -2.844567  
H -1.410862 4.841018 -3.374173  
C -2.453924 4.346261 -1.551064  
H -2.190431 5.286846 -1.060820  
C -3.232877 3.411725 -0.860462  
C -3.382318 0.565458 -3.437542  
H -3.228256 -0.172786 -2.630885  
C -2.386757 0.206411 -4.542810  
H -2.559373 0.852769 -5.421613  
H -1.376080 0.444844 -4.182241  
C -4.856236 0.426553 -3.890214  
H -4.906775 0.551283 -4.986682  
C -5.510925 -0.885224 -3.475012  
C -3.671467 3.707672 0.560788  
H -4.365408 2.910362 0.868469  
C -2.446024 3.622774 1.490906  
H -2.072522 2.584452 1.464677  
H -1.633659 4.232733 1.059209  
C -4.438542 5.045092 0.641793  
H -4.891598 5.243377 -0.342989  
C -5.541505 5.080926 1.693612  
C 4.644483 1.489444 0.154736  
C 5.694582 2.653399 0.116348  
C 2.672592 2.818020 -0.379830  
C 2.109257 3.723243 0.549206  
C 1.316610 4.762865 0.050292  
H 0.873804 5.482301 0.737254  
C 1.096496 4.920122 -1.314791  
H 0.464783 5.734316 -1.674163  
C 1.715523 4.063829 -2.219367  
H 1.581336 4.225904 -3.290125  
C 2.521294 3.012504 -1.773597  
C 2.471677 3.625381 2.025154  
H 3.520085 3.285416 2.037151  
C 1.695262 2.540846 2.777125  
H 0.622339 2.790652 2.798497  
H 1.765902 1.609202 2.201143  
C 2.451180 4.980908 2.761156  
C 1.112255 5.431152 3.341685  
H 3.179205 4.929628 3.587585  
C 3.280405 2.130902 -2.749013  
H 4.111461 1.682539 -2.186861  
C 2.453162 0.938789 -3.255319  
H 2.009902 0.419037 -2.389006  
C 1.341369 1.273100 -4.233328  
C 3.923648 2.937402 -3.885302  
H 4.496327 3.765068 -3.434521  
C 4.839664 2.110269 -4.777416  
Ca -2.464731 -0.105637 0.038642  
Mg 1.953501 0.024666 0.068998  
N -4.381592 -1.241901 0.769148  
N 3.494055 -1.404999 0.183069  
C -6.228979 0.092474 0.003141  
H -7.317842 0.159896 0.008828  
C -5.679950 -1.046394 0.629864  
C -6.665406 -2.073092 1.140240  
C -3.810611 -2.358010 1.397369  
C -3.236736 -2.180211 2.684261

C -2.538782 -3.246384 3.258246  
H -2.095138 -3.131099 4.248167  
C -2.398008 -4.459808 2.588219  
H -1.850605 -5.282166 3.055017  
C -2.949710 -4.619204 1.320028  
H -2.828514 -5.571221 0.799648  
C -3.649950 -3.580104 0.698810  
C -3.385220 -0.836562 3.376074  
H -3.207928 -0.073224 2.595944  
C -2.310668 -0.606825 4.437205  
H -2.484690 -1.277142 5.297435  
H -1.347457 -0.905375 4.003065  
C -4.821640 -0.591129 3.897722  
H -5.496880 -1.349960 3.477425  
H -4.838164 -0.759952 4.989199  
C -4.173282 -3.712954 -0.715301  
H -4.954173 -2.950745 -0.845251  
C -3.085318 -3.349156 -1.744144  
H -2.721884 -2.326578 -1.536442  
C -1.890888 -4.285548 -1.814303  
C -4.839372 -5.067969 -0.982841  
C -5.542068 -5.145895 -2.331653  
H -4.102356 -5.884970 -0.908635  
C 5.254926 0.229939 0.320249  
H 6.330116 0.292884 0.418668  
C 4.785335 -1.097344 0.298829  
C 5.957765 -2.134994 0.336477  
C 2.921755 -2.689042 0.392004  
C 2.495707 -3.477620 -0.695476  
C 1.684127 -4.590174 -0.438412  
H 1.331016 -5.196695 -1.275916  
C 1.321185 -4.936496 0.857869  
H 0.663404 -5.789439 1.037323  
C 1.835790 -4.210088 1.931256  
H 1.601248 -4.524156 2.949839  
C 2.652220 -3.095849 1.723907  
C 2.947329 -3.206071 -2.120101  
H 3.707112 -2.407790 -2.075764  
C 1.777909 -2.688304 -2.971200  
H 0.934214 -3.390350 -2.860928  
H 1.423252 -1.744933 -2.534040  
C 3.605970 -4.469606 -2.726984  
H 3.943547 -5.127867 -1.910613  
H 2.839511 -5.052648 -3.266784  
C 3.288968 -2.353981 2.884842  
H 4.164374 -1.830428 2.477230  
C 2.400458 -1.241881 3.462284  
H 2.039077 -0.610875 2.633445  
C 1.214140 -1.710396 4.284473  
C 3.826491 -3.310141 3.958589  
H 4.463318 -4.060044 3.460096  
C 4.619942 -2.617655 5.058575  
H -3.728203 5.874146 0.810459  
H -5.444803 1.258569 -3.479055  
C -2.416445 -1.250587 -4.979105  
H -5.567487 -5.252337 -0.175092  
H -3.557426 -3.276918 -2.735968  
C -5.370232 0.791254 3.565512  
C -2.197734 0.827833 4.925840  
C 4.790218 -4.193651 -3.644521  
C 2.050526 -2.477704 -4.452596  
H 3.002705 -3.883390 4.413488  
C -2.661600 4.026785 2.940811

H 3.030522 -0.576088 4.071500  
C 2.209230 2.271993 4.182883  
H 2.841885 5.754794 2.079906  
H 3.150839 3.419676 -4.505449  
H 3.138547 0.205200 -3.706330  
C 6.370218 2.704305 1.501707  
C 6.753512 2.355191 -0.964345  
C 5.186958 4.071478 -0.181063  
C 6.847108 -1.895974 1.570584  
C 5.576165 -3.618820 0.356721  
C 6.788067 -1.910233 -0.944860  
C -0.118328 1.251223 0.285460  
C -0.417459 0.279983 1.361323  
C -0.071524 -1.088783 0.910480  
C -0.126303 -1.433806 -0.427188  
C -0.180310 0.891612 -1.048090  
C -0.554003 -0.474156 -1.458681  
H -0.148552 0.551317 2.382361  
H 0.131713 -1.876198 1.637569  
H 0.065387 -2.472843 -0.692441  
H -0.055172 1.678589 -1.793697  
H -0.375682 -0.746300 -2.499516  
H 0.059435 2.299684 0.520586  
H 0.790117 0.366423 -4.517465  
H 0.615860 1.979021 -3.803217  
H 1.734030 1.720238 -5.159448  
H 5.365826 2.746531 -5.505170  
H 5.603175 1.579802 -4.185162  
H 4.283923 1.351099 -5.348814  
H -6.558925 -0.934065 -3.810182  
H -4.987445 -1.757017 -3.893347  
H -5.507916 -0.984817 -2.378843  
H -1.638077 -1.450799 -5.732178  
H -2.234626 -1.918511 -4.123489  
H -3.381531 -1.533166 -5.426239  
H -6.094206 -6.092092 -2.439812  
H -6.263123 -4.321000 -2.452443  
H -4.831831 -5.084089 -3.170513  
H -1.171931 -3.932189 -2.568430  
H -1.360023 -4.339276 -0.852817  
H -2.184789 -5.309046 -2.096304  
H 5.183227 -5.127382 -4.076138  
H 4.529455 -3.526533 -4.477748  
H 5.612538 -3.717706 -3.088752  
H 1.164308 -2.049237 -4.945003  
H 2.889657 -1.785333 -4.621883  
H 2.284945 -3.419428 -4.971237  
H 1.645398 1.454757 4.656021  
H 3.270957 1.977957 4.162186  
H 2.122280 3.151187 4.838340  
H 1.193822 6.447623 3.756249  
H 0.301209 5.442163 2.599896  
H 0.780287 4.774378 4.159179  
H 5.075163 -3.351833 5.740541  
H 5.433831 -2.002634 4.641460  
H 3.988524 -1.953082 5.667781  
H 0.634573 -0.852892 4.653047  
H 0.530987 -2.343619 3.699199  
H 1.531372 -2.290040 5.164869  
H -6.390210 0.924186 3.958952  
H -4.745411 1.592029 3.987095  
H -5.413041 0.937915 2.474930  
H -1.354419 0.941308 5.625285

H -2.025756 1.510666 4.080690  
H -3.103795 1.165031 5.451642  
H -6.075717 6.043888 1.676125  
H -6.283546 4.287326 1.509683  
H -5.159295 4.931743 2.712418  
H -2.920520 5.091820 3.039025  
H -3.463698 3.439061 3.411481  
H -1.744703 3.861482 3.526150  
H 7.128414 3.502977 1.518043  
H 5.633051 2.924138 2.289098  
H 6.865592 1.759773 1.763532  
H 7.467963 3.190909 -1.018667  
H 7.329577 1.442033 -0.768443  
H 6.285219 2.250589 -1.953929  
H 6.057364 4.745754 -0.162177  
H 4.720258 4.161211 -1.168095  
H 4.474471 4.442387 0.561155  
H 7.678054 -2.618195 1.568069  
H 7.284295 -0.889477 1.601224  
H 6.280394 -2.044684 2.500809  
H 6.507087 -4.206846 0.345184  
H 5.013410 -3.906835 1.251003  
H 4.990600 -3.916824 -0.517078  
H 7.583516 -2.668895 -1.013938  
H 6.154879 -1.999756 -1.839607  
H 7.260421 -0.919733 -0.971792  
H -7.512750 -1.585585 1.642958  
H -7.075040 -2.650571 0.295423  
H -6.194068 -2.783361 1.832252  
H -7.384667 1.912224 -1.506780  
H -6.572079 3.012778 -0.376477  
H -5.910490 2.802529 -2.004199

230

**(DIPePBDI\*)Mg(naphthalene)Ca(DIPePBDI) (4)**

Ca 2.580579 -0.150195 0.322968  
Mg -2.033434 0.023227 -0.067575  
N -3.646169 -1.301890 0.160851  
N -3.297021 1.586123 -0.741945  
N 4.215714 1.472057 0.709652  
N 4.483738 -1.112650 -0.649903  
C -4.907507 -1.008788 -0.145836  
C -5.277375 0.232618 -0.706098  
H -6.332608 0.289798 -0.929727  
C -4.601477 1.442933 -0.963431  
C -6.161613 -1.924551 0.102332  
C -7.044013 -1.228418 1.157538  
H -6.493964 -1.067300 2.092647  
H -7.918514 -1.858315 1.385427  
H -7.407663 -0.250797 0.814146  
C -5.901795 -3.352800 0.598767  
H -5.253204 -3.926591 -0.068610  
H -6.869954 -3.874841 0.651879  
H -5.453903 -3.386155 1.594880  
C -6.987862 -2.064036 -1.195163  
H -7.392098 -1.109691 -1.556340  
H -7.844984 -2.727840 -1.003864  
H -6.398977 -2.505886 -2.010717  
C -5.583417 2.543889 -1.516541  
C -5.008750 3.941650 -1.792646  
H -4.508376 4.384989 -0.924135  
H -5.847619 4.601296 -2.064355  
H -4.299436 3.961243 -2.625447

C -6.742244 2.751976 -0.518175  
H -7.302680 1.831279 -0.313909  
H -7.449466 3.486081 -0.934385  
H -6.382690 3.141956 0.441654  
C -6.192650 2.037122 -2.841178  
H -5.419894 1.828051 -3.594174  
H -6.862743 2.807363 -3.254449  
H -6.777951 1.117751 -2.708501  
C -3.193082 -2.495028 0.785330  
C -3.256114 -2.621247 2.196214  
C -2.773347 -3.794805 2.783774  
H -2.843766 -3.920166 3.865407  
C -2.224281 -4.813331 2.014036  
H -1.856819 -5.724803 2.491084  
C -2.121258 -4.656366 0.636119  
H -1.659469 -5.449091 0.046938  
C -2.580788 -3.502080 -0.004921  
C -3.870673 -1.530747 3.055324  
H -4.409520 -0.858638 2.372969  
C -4.902943 -2.071664 4.056022  
H -5.632218 -2.691187 3.510290  
H -4.419206 -2.756750 4.770822  
C -5.640170 -0.982199 4.824113  
H -4.967584 -0.417646 5.487527  
H -6.438115 -1.408809 5.451123  
H -6.106523 -0.254539 4.140496  
C -2.806971 -0.645458 3.731757  
H -2.074378 -0.347112 2.965650  
H -3.297413 0.286976 4.049282  
C -2.089021 -1.255344 4.925058  
H -1.355567 -0.546174 5.338838  
H -1.542636 -2.166924 4.647083  
H -2.786301 -1.508589 5.738874  
C -2.443078 -3.337790 -1.512032  
H -2.177036 -2.279865 -1.673379  
C -1.316367 -4.183068 -2.117233  
H -0.393345 -4.001516 -1.550474  
H -1.537860 -5.255443 -1.990361  
C -1.058754 -3.912834 -3.592459  
H -0.801160 -2.857374 -3.768559  
H -1.932173 -4.147101 -4.219344  
H -0.222093 -4.523826 -3.964339  
C -3.773270 -3.564234 -2.248401  
H -4.521597 -2.905962 -1.794653  
H -3.675903 -3.207623 -3.286038  
C -4.268903 -5.003154 -2.248033  
H -3.638179 -5.655631 -2.871571  
H -5.295442 -5.069043 -2.640452  
H -4.272229 -5.428346 -1.231656  
C -2.544512 2.765784 -0.949173  
C -2.164558 3.538208 0.174062  
C -1.378657 4.676019 -0.038879  
H -1.090905 5.297318 0.808437  
C -0.946321 5.026057 -1.312413  
H -0.329526 5.916113 -1.456654  
C -1.284736 4.228014 -2.402300  
H -0.923368 4.505802 -3.392348  
C -2.075225 3.088102 -2.246810  
C -2.590027 3.126442 1.573664  
H -2.513888 2.025902 1.596696  
C -1.630382 3.654452 2.644405  
H -0.598854 3.469620 2.309567  
H -1.730733 4.751536 2.718067



C -1.820394 3.051246 4.027968  
H -1.067887 3.439520 4.731689  
H -1.718422 1.956138 4.001905  
H -2.810505 3.281571 4.449961  
C -4.063610 3.472603 1.887071  
H -4.095823 4.357436 2.546977  
H -4.564348 3.788079 0.962684  
C -4.848573 2.323338 2.504625  
H -4.403544 1.989214 3.451997  
H -4.869618 1.457963 1.823689  
H -5.891718 2.607878 2.713211  
C -0.008368 -0.877989 -0.839585  
H 0.113279 -1.510137 -1.721314  
C 0.422801 0.532667 -0.971440  
H 0.726827 0.944939 -1.933927  
C 0.278663 1.327492 0.140212  
H 0.481225 2.400938 0.120374  
C -0.281760 0.687149 1.336950  
H -0.357488 1.319809 2.222553  
C 0.187846 -0.686115 1.597609  
C 0.441216 -1.228278 2.862231  
H 0.340032 -0.586536 3.735703  
C 0.733274 -2.592589 3.023341  
H 0.853908 -3.006791 4.027121  
C 0.893098 -3.397125 1.904277  
H 1.140465 -4.455373 2.009886  
C 0.748346 -2.849136 0.619608  
H 0.926890 -3.471508 -0.255926  
C 0.323221 -1.524259 0.443487  
C 6.369076 2.633320 1.027126  
H 5.753667 3.484454 1.341919  
H 7.071587 2.969220 0.251419  
H 6.972611 2.308114 1.889443  
C 5.531560 1.470143 0.537748  
C 6.247845 0.417864 -0.062332  
H 7.327372 0.564656 -0.131516  
C 5.758827 -0.763473 -0.655023  
C 6.789613 -1.615184 -1.363622  
H 6.353540 -2.533553 -1.774188  
H 7.610387 -1.884724 -0.682772  
H 7.235550 -1.041106 -2.190455  
C 3.508078 2.642295 1.045133  
C 3.366266 3.672835 0.077986  
C 2.528405 4.750728 0.372017  
H 2.394652 5.543830 -0.365251  
C 1.857530 4.833564 1.588032  
H 1.211635 5.687452 1.801331  
C 2.014797 3.826625 2.534660  
H 1.492928 3.912303 3.486985  
C 2.827597 2.716191 2.287430  
C 4.066082 3.571588 -1.267500  
H 5.003169 3.018145 -1.118316  
C 4.462607 4.925592 -1.865719  
H 4.901477 4.733751 -2.860014  
H 3.568708 5.540806 -2.059339  
C 5.451950 5.712509 -1.017504  
H 5.707364 6.674464 -1.487857  
H 6.388901 5.151380 -0.877324  
H 5.044096 5.926162 -0.017620  
C 3.250140 2.722137 -2.259107  
H 3.865359 2.556411 -3.160025  
H 3.110047 1.723188 -1.813082  
C 1.901845 3.305019 -2.638733

H 2.000483 4.284972 -3.130203  
H 1.257926 3.440652 -1.760685  
H 1.360014 2.652283 -3.338279  
C 3.022601 1.629364 3.334533  
H 2.904504 0.647797 2.834109  
C 4.458719 1.636805 3.891818  
H 4.578239 0.779216 4.572952  
H 5.150747 1.447024 3.061955  
C 4.845484 2.925082 4.602397  
H 5.894015 2.892003 4.935700  
H 4.224333 3.108009 5.493381  
H 4.731309 3.795332 3.937407  
C 1.965383 1.654354 4.443534  
H 1.992687 2.621846 4.970242  
H 0.972754 1.602044 3.969965  
C 2.108907 0.538307 5.469782  
H 2.985508 0.684087 6.118795  
H 2.213507 -0.444483 4.985217  
H 1.224367 0.492629 6.123062  
C 4.006324 -2.366106 -1.071194  
C 3.153267 -2.419241 -2.208146  
C 2.503806 -3.621106 -2.500192  
H 1.846053 -3.681209 -3.365730  
C 2.674683 -4.748403 -1.700842  
H 2.139413 -5.671203 -1.935437  
C 3.536561 -4.695218 -0.610666  
H 3.680735 -5.589413 -0.000585  
C 4.231580 -3.527126 -0.283274  
C 3.018648 -1.201410 -3.111040  
H 2.835504 -0.322178 -2.464254  
C 1.835713 -1.287237 -4.080488  
H 1.958433 -2.155474 -4.748105  
H 0.924622 -1.486378 -3.497656  
C 1.622274 -0.042757 -4.928635  
H 2.444024 0.124150 -5.640857  
H 1.539677 0.858850 -4.303610  
H 0.695178 -0.125739 -5.514954  
C 4.344527 -0.900372 -3.837487  
H 4.223018 0.027395 -4.418774  
H 5.106101 -0.668153 -3.083616  
C 4.836535 -2.021377 -4.740514  
H 5.804975 -1.763871 -5.196058  
H 4.133490 -2.229670 -5.562389  
H 4.969149 -2.957822 -4.176375  
C 5.219941 -3.539465 0.875135  
H 5.920593 -2.706138 0.727235  
C 4.572584 -3.305679 2.247838  
H 3.820902 -4.090196 2.440217  
H 5.359132 -3.435698 3.010638  
C 3.929220 -1.942327 2.428444  
H 2.983111 -1.925469 1.865036  
H 4.600877 -1.128881 2.111165  
H 3.643114 -1.767969 3.474173  
C 6.057349 -4.828333 0.920337  
H 6.761560 -4.734226 1.764316  
H 5.405653 -5.678848 1.185888  
C 6.833791 -5.151804 -0.347782  
H 7.569857 -4.367059 -0.577587  
H 6.167263 -5.247310 -1.218342  
H 7.383662 -6.099577 -0.242169  
C -2.506758 2.242725 -3.433761  
C -2.332313 2.961807 -4.774320  
H -3.585731 2.080980 -3.304609

C -1.869462 0.836638 -3.439940  
C -2.937012 2.232865 -5.966350  
H -2.783067 3.966174 -4.700622  
H -1.256674 3.125099 -4.963276  
C -2.857469 -0.295703 -3.677036  
H -1.063027 0.809544 -4.191095  
H -1.356937 0.665571 -2.486270  
H -2.829033 2.828121 -6.886028  
H -2.449967 1.262600 -6.146430  
H -4.012203 2.042176 -5.818896  
H -2.340477 -1.262688 -3.741662  
H -3.586644 -0.360611 -2.854164  
H -3.427065 -0.162341 -4.608409

236

**(DIPePBDI\*)Mg(anthracene)Ca(DIPePBDI) (5)**

Ca 2.940780 -0.218553 -0.217899  
Mg -2.445559 0.035264 -0.080437  
N -3.313845 1.639947 0.987153  
N -4.104460 -1.253300 0.143212  
N 4.496707 1.226647 -1.174341  
N 4.937617 -1.376136 0.143452  
C -4.540039 1.554676 1.504536  
C -5.360602 0.418626 1.337120  
H -6.333114 0.551732 1.789065  
C -5.229716 -0.850527 0.729975  
C -5.276602 2.669899 2.336533  
C -4.502359 3.969237 2.588723  
H -3.624809 3.825938 3.224242  
H -5.173998 4.670939 3.107290  
H -4.167225 4.453484 1.667858  
C -5.671267 2.105157 3.717352  
H -6.379026 1.269174 3.644403  
H -6.150648 2.898601 4.311749  
H -4.798406 1.748404 4.281050  
C -6.580650 3.063800 1.607605  
H -6.386479 3.453573 0.599575  
H -7.090704 3.854231 2.179906  
H -7.279750 2.223681 1.507070  
C -6.555383 -1.685687 0.864665  
C -6.906565 -1.841101 2.360734  
H -6.110466 -2.353443 2.917584  
H -7.823487 -2.443076 2.457020  
H -7.088861 -0.878935 2.856414  
C -7.710121 -0.915803 0.190326  
H -7.912033 0.049445 0.672932  
H -8.630976 -1.517251 0.244922  
H -7.503731 -0.717127 -0.870308  
C -6.547489 -3.096712 0.264465  
H -6.443289 -3.095833 -0.823480  
H -7.510564 -3.573947 0.503701  
H -5.754771 -3.730435 0.671116  
C -2.360232 2.667151 1.226838  
C -2.047471 3.609389 0.213429  
C -1.045243 4.551847 0.469335  
H -0.810508 5.298767 -0.287419  
C -0.334652 4.560444 1.664098  
H 0.444542 5.306355 1.834270  
C -0.618562 3.606034 2.633766  
H -0.045020 3.601039 3.561147  
C -1.624634 2.657108 2.440851  
C -2.783740 3.622328 -1.116790  
H -2.927182 2.564225 -1.393976

C -4.187927 4.230946 -0.986649  
H -4.717867 3.668686 -0.209944  
H -4.751503 4.041358 -1.913309  
C -4.218027 5.718767 -0.668632  
H -3.848870 6.326036 -1.509599  
H -3.593714 5.958863 0.206650  
H -5.243345 6.054186 -0.449156  
C -1.981494 4.282067 -2.245326  
H -1.832565 5.352063 -2.026781  
H -0.972912 3.842836 -2.260638  
C -2.609078 4.152218 -3.625847  
H -1.952004 4.585347 -4.395933  
H -3.576184 4.673332 -3.693400  
H -2.778116 3.098265 -3.892313  
C -1.980611 1.658913 3.523979  
H -3.078265 1.624355 3.549853  
C -1.519954 2.049004 4.933010  
H -1.730707 1.195511 5.598528  
H -0.420892 2.150280 4.942522  
C -2.172614 3.294768 5.516539  
H -1.989116 4.185056 4.896633  
H -1.789031 3.507424 6.526386  
H -3.263371 3.170416 5.596902  
C -1.528099 0.221117 3.217363  
H -1.396183 0.074321 2.133284  
H -0.517787 0.066342 3.624861  
C -2.502716 -0.805021 3.769303  
H -2.100307 -1.822472 3.705550  
H -3.454759 -0.776706 3.216750  
H -2.727813 -0.609481 4.829846  
C -3.915288 -2.448201 -0.605519  
C -3.156610 -3.517014 -0.067730  
C -2.910533 -4.633603 -0.875262  
H -2.343968 -5.472354 -0.470010  
C -3.360505 -4.695499 -2.189765  
H -3.148921 -5.574864 -2.802702  
C -4.067116 -3.622952 -2.721914  
H -4.396140 -3.661958 -3.760922  
C -4.357552 -2.495355 -1.952159  
C -2.613922 -3.463764 1.349770  
H -2.323641 -2.413039 1.523200  
C -1.357746 -4.319443 1.549054  
H -1.602075 -5.387594 1.431610  
H -0.652945 -4.092119 0.737645  
C -0.661372 -4.122996 2.888513  
H -0.410715 -3.065097 3.058500  
H 0.281380 -4.690649 2.925919  
H -1.281126 -4.460441 3.733379  
C -3.700865 -3.793089 2.385192  
H -3.312489 -3.591576 3.395409  
H -4.519230 -3.077584 2.244050  
C -4.237691 -5.215678 2.325158  
H -3.472434 -5.955527 2.606953  
H -4.586703 -5.475309 1.313353  
H -5.086112 -5.344462 3.014722  
C -0.752433 -1.572967 -0.837444  
H -0.858740 -2.645205 -0.683266  
C 0.137910 -0.874890 0.039319  
C 0.890426 -1.457409 1.086050  
H 0.898128 -2.541202 1.197313  
C 1.559566 -0.660379 2.038588  
H 2.058075 -1.140189 2.880475  
C 1.585412 0.726955 1.886618

H 2.078311 1.353940 2.628540  
C 0.964943 1.327138 0.766307  
H 1.008951 2.408095 0.625744  
C 0.206210 0.563461 -0.143972  
C -0.604512 1.100998 -1.202204  
H -0.539227 2.179785 -1.328316  
C -0.784480 0.302902 -2.413947  
C -0.954255 0.824019 -3.702880  
H -0.870306 1.901731 -3.855673  
C -1.262494 -0.014707 -4.783069  
H -1.415030 0.414638 -5.776687  
C -1.381383 -1.390286 -4.583871  
H -1.631487 -2.048706 -5.419517  
C -1.178047 -1.932808 -3.309027  
H -1.280447 -3.007687 -3.146494  
C -0.884695 -1.107976 -2.217178  
C 6.511265 2.154126 -2.244781  
H 5.862277 3.003111 -2.490677  
H 6.937580 1.753641 -3.176672  
H 7.353850 2.520021 -1.638574  
C 5.765393 1.070982 -1.500102  
C 6.501836 -0.097712 -1.202720  
H 7.520278 -0.117434 -1.592827  
C 6.123268 -1.220658 -0.444203  
C 7.141415 -2.327023 -0.315465  
H 7.317818 -2.581442 0.738119  
H 8.096584 -2.061038 -0.784070  
H 6.758402 -3.243180 -0.791287  
C 3.725299 2.375568 -1.435482  
C 4.681328 -2.506620 0.956557  
C 5.007200 -2.471276 2.337638  
C 4.603095 -3.536621 3.147109  
H 4.847604 -3.523642 4.211066  
C 3.916340 -4.628857 2.621631  
H 3.614712 -5.452826 3.272535  
C 3.647674 -4.679773 1.258248  
H 3.159448 -5.562748 0.842959  
C 4.019517 -3.632355 0.406005  
C 5.772818 -1.296996 2.922586  
H 6.317588 -0.824075 2.091260  
C 6.815075 -1.700682 3.972250  
H 7.264695 -0.774131 4.369707  
H 6.323216 -2.176427 4.836552  
C 7.913860 -2.614239 3.449314  
H 8.489075 -2.125764 2.646900  
H 7.497833 -3.548858 3.041858  
H 8.623643 -2.884789 4.246118  
C 4.823321 -0.209067 3.455261  
H 5.420728 0.692861 3.669414  
H 4.144629 0.071759 2.637025  
C 4.004689 -0.574315 4.684552  
H 4.638776 -0.733077 5.570318  
H 3.421721 -1.494798 4.528132  
H 3.293675 0.228971 4.932172  
C -5.152425 -1.337629 -2.520204  
H -5.832588 -1.012485 -1.720399  
C -6.024367 -1.688490 -3.730475  
H -6.460995 -0.748878 -4.107844  
H -5.380203 -2.050396 -4.550065  
C -7.149088 -2.679614 -3.464162  
H -7.727062 -2.879240 -4.379729  
H -7.850225 -2.293001 -2.708712  
H -6.767799 -3.643570 -3.094933

C -4.275162 -0.118572 -2.850329  
H -3.349279 -0.134856 -2.254422  
H -3.902466 -0.206782 -3.882148  
C -5.011421 1.192823 -2.640150  
H -5.974175 1.202623 -3.175463  
H -4.427202 2.045905 -3.005723  
H -5.225324 1.356536 -1.571781  
C 3.814390 3.510054 -0.586388  
C 2.870118 4.529776 -0.728626  
H 2.923842 5.403390 -0.076396  
C 1.867447 4.460665 -1.691873  
H 1.136709 5.265586 -1.785444  
C 1.823088 3.371616 -2.553536  
H 1.068005 3.329559 -3.341667  
C 2.741300 2.320800 -2.455530  
C 4.902997 3.599394 0.465900  
H 5.732156 2.961658 0.129430  
C 5.477984 5.010858 0.633299  
H 4.699171 5.703449 0.992542  
H 6.227133 4.972702 1.443088  
C 6.117337 5.575447 -0.627437  
H 6.509852 6.589801 -0.457918  
H 5.392334 5.630439 -1.454056  
H 6.955516 4.946576 -0.964953  
C 4.452026 2.994327 1.805544  
H 5.334877 2.929541 2.464224  
H 4.148675 1.952765 1.618144  
C 3.330395 3.726704 2.523650  
H 3.606919 4.763353 2.770309  
H 3.081633 3.227058 3.472685  
H 2.414568 3.759406 1.916636  
C 2.712331 1.255951 -3.540420  
H 1.807747 1.477722 -4.130780  
C 2.525602 -0.198998 -3.082432  
H 3.456992 -0.565263 -2.610928  
H 1.685589 -0.224857 -2.361378  
C 2.153324 -1.130908 -4.228874  
H 3.013141 -1.339732 -4.881986  
H 1.348380 -0.688637 -4.832047  
H 1.770257 -2.087040 -3.854542  
C 3.913377 1.388197 -4.492277  
H 4.822039 1.045654 -3.972861  
H 3.765872 0.687943 -5.329373  
C 4.118332 2.789111 -5.048209  
H 4.966738 2.817426 -5.749089  
H 4.314331 3.520787 -4.250161  
H 3.224024 3.135202 -5.591428  
C 3.776752 -3.727850 -1.087614  
H 4.303742 -2.874898 -1.544525  
C 2.299103 -3.564843 -1.490925  
H 1.902295 -2.625047 -1.069356  
H 2.262621 -3.427184 -2.580290  
C 1.347848 -4.686873 -1.110683  
H 1.261784 -4.801345 -0.021419  
H 1.670722 -5.654782 -1.524702  
H 0.340523 -4.481327 -1.500637  
C 4.420937 -4.992358 -1.678272  
H 5.465315 -5.036524 -1.327283  
H 3.938149 -5.893572 -1.265396  
C 4.391176 -5.045210 -3.199444  
H 4.836397 -4.136494 -3.636746  
H 3.365890 -5.129647 -3.590813  
H 4.957451 -5.909802 -3.578020

212

**(DIPePBDI)Ca(naphthalene)Ca(DIPePBDI) (6)**

Ca 2.741107 0.180725 0.048870  
Ca -2.601500 -0.205131 -0.397933  
N 4.946971 -0.577140 -0.336190  
N 3.864125 0.901892 1.942081  
N -3.924199 1.251510 -1.624614  
N -4.634438 -1.333576 -0.352940  
C 7.367855 -1.012356 -0.142091  
H 7.648434 -1.857071 0.506512  
H 8.183190 -0.277114 -0.085804  
H 7.294379 -1.385056 -1.170183  
C 6.069209 -0.406793 0.347836  
C 6.158603 0.279340 1.579360  
H 7.155306 0.319913 2.020679  
C 5.124328 0.839573 2.348706  
C 5.473110 1.357083 3.722151  
H 5.089796 2.378716 3.864100  
H 6.555821 1.351513 3.898774  
H 4.990128 0.736757 4.492975  
C 4.936828 -1.206036 -1.598045  
C 4.370615 -2.498075 -1.731764  
C 4.269979 -3.049389 -3.013470  
H 3.856474 -4.050760 -3.138500  
C 4.681837 -2.344666 -4.140923  
H 4.584377 -2.792648 -5.132629  
C 5.220095 -1.068312 -3.999304  
H 5.536935 -0.519268 -4.888476  
C 5.367689 -0.483207 -2.740163  
C 3.887399 -3.257683 -0.506587  
H 3.317518 -2.537394 0.108278  
C 2.918393 -4.400843 -0.840569  
H 2.257894 -4.086767 -1.663546  
H 3.482305 -5.265643 -1.229661  
C 2.051155 -4.837184 0.331340  
H 1.404890 -5.683136 0.052625  
H 1.398774 -4.015218 0.662495  
H 2.648908 -5.154999 1.199128  
C 5.054952 -3.734849 0.380556  
H 5.521028 -2.855654 0.847008  
H 4.638986 -4.321789 1.216313  
C 6.110927 -4.553486 -0.347953  
H 5.687232 -5.463639 -0.801219  
H 6.907987 -4.872120 0.341345  
H 6.577377 -3.972253 -1.157737  
C 5.911264 0.925919 -2.584670  
H 6.390088 0.992066 -1.596204  
C 6.976763 1.298915 -3.619917  
H 6.536987 1.280274 -4.632304  
H 7.266656 2.348651 -3.451628  
C 8.222943 0.425799 -3.574287  
H 7.981256 -0.633169 -3.752408  
H 8.714145 0.490457 -2.590905  
H 8.957164 0.735001 -4.334021  
C 4.752037 1.936557 -2.568470  
H 4.361221 2.048039 -3.595165  
H 3.912874 1.499527 -2.003395  
C 5.100878 3.291230 -1.972133  
H 4.232033 3.965745 -1.987445  
H 5.913361 3.790155 -2.522030  
H 5.423194 3.183206 -0.924038  
C 2.814076 1.265276 2.810516

C 2.324144 2.593309 2.817373  
C 1.156558 2.867263 3.538050  
H 0.760633 3.884624 3.555643  
C 0.502813 1.870860 4.257758  
H -0.411258 2.105703 4.808132  
C 1.027382 0.581492 4.295130  
H 0.531785 -0.181790 4.897661  
C 2.184897 0.253660 3.582900  
C 3.103141 3.683577 2.107704  
H 4.111134 3.276750 1.933317  
C 2.554515 4.005954 0.707679  
H 3.280297 4.651755 0.188392  
H 2.524558 3.070347 0.123341  
C 1.178269 4.646216 0.664293  
H 0.865473 4.831505 -0.373083  
H 1.154588 5.611205 1.194568  
H 0.420323 3.993534 1.119804  
C 3.276067 4.926152 2.993394  
H 2.298716 5.396430 3.191790  
H 3.644280 4.592023 3.978044  
C 4.228440 5.965901 2.418825  
H 3.839205 6.415594 1.492398  
H 5.208438 5.520095 2.181777  
H 4.399382 6.786048 3.132950  
C 2.808987 -1.126606 3.653789  
H 3.783495 -1.048789 3.152096  
C 3.105896 -1.542029 5.101538  
H 3.612403 -0.700380 5.602928  
H 2.165854 -1.689382 5.658745  
C 3.972498 -2.789703 5.204798  
H 3.468561 -3.676648 4.790696  
H 4.227677 -3.015630 6.251588  
H 4.915834 -2.659741 4.649532  
C 2.036783 -2.198974 2.858080  
H 1.712852 -1.767780 1.893667  
H 2.740825 -3.005277 2.598987  
C 0.817870 -2.800327 3.538101  
H 0.074755 -2.031854 3.788331  
H 1.088860 -3.334646 4.461516  
H 0.320535 -3.521079 2.872892  
C -0.029390 0.581013 -0.022279  
H -0.838333 1.053063 1.046671  
C -0.899890 2.126965 1.211020  
C -1.465331 0.156243 1.971425  
H -1.989996 0.563467 2.836118  
C -1.431148 -1.202737 1.745075  
H -1.955416 -1.897967 2.402670  
C -0.717511 -1.709242 0.604914  
H -0.685801 -2.783914 0.428699  
C 0.093429 -0.866688 -0.202924  
C 1.007660 -1.337364 -1.190881  
H 1.138896 -2.413134 -1.297774  
C 1.510952 -0.462282 -2.220421  
C 1.310207 0.894810 -2.105595  
C 0.641676 1.430306 -0.951641  
H 0.456154 2.501656 -0.889388  
C -5.709798 2.148221 -3.065004  
H -5.063106 3.031479 -3.136050  
H -6.703028 2.461430 -2.711046  
H -5.843519 1.736967 -4.077591  
C -5.131290 1.095066 -2.144704  
C -5.959170 -0.019432 -1.891639  
H -6.926268 -0.001503 -2.397954

C -5.752062 -1.120372 -1.034645  
C -6.899680 -2.105969 -0.951132  
H -6.778570 -2.808644 -0.117494  
H -6.949491 -2.692282 -1.882122  
H -7.861972 -1.585446 -0.848711  
C -3.080040 2.332340 -1.946576  
C -2.347462 2.308874 -3.160503  
C -1.429356 3.328572 -3.412738  
H -0.854487 3.319530 -4.340705  
C -1.229451 4.355130 -2.492835  
H -0.515359 5.153295 -2.709456  
C -1.932755 4.356474 -1.291648  
H -1.760689 5.160876 -0.575553  
C -2.850467 3.346084 -0.986152  
C -2.526733 1.130222 -4.095333  
H -3.585136 0.836014 -4.043406  
C -1.711646 -0.087236 -3.601463  
H -0.762814 -0.143083 -4.157383  
H -1.360562 0.085803 -2.568356  
C -2.470495 -1.399682 -3.714705  
H -2.781766 -1.587951 -4.754252  
H -3.392004 -1.385631 -3.107719  
H -1.855761 -2.252654 -3.395501  
C -2.232147 1.427086 -5.566575  
H -1.182171 1.748014 -5.679905  
H -2.304460 0.476843 -6.123011  
C -3.169629 2.450867 -6.190618  
H -2.923149 2.632646 -7.247966  
H -3.121539 3.415435 -5.662624  
H -4.214903 2.105669 -6.146881  
C -3.609879 3.332679 0.326985  
H -3.655396 2.277718 0.656440  
C -2.908776 4.116953 1.443563  
H -1.822056 3.962942 1.363803  
H -3.064468 5.199165 1.297907  
C -3.354463 3.717927 2.842278  
H -4.438024 3.848020 2.987582  
H -2.844845 4.319306 3.610388  
H -3.118678 2.660917 3.038442  
C -5.076644 3.770210 0.138388  
H -5.591305 3.003942 -0.458627  
H -5.573955 3.758179 1.122061  
C -5.258129 5.131795 -0.516302  
H -6.325887 5.381334 -0.613113  
H -4.814333 5.153765 -1.523426  
H -4.785711 5.938000 0.066936  
C -4.543986 -2.302130 0.668273  
C -3.887323 -3.533972 0.430667  
C -3.789591 -4.451407 1.481876  
H -3.315291 -5.418798 1.309466  
C -4.273945 -4.149476 2.751297  
H -4.192618 -4.882101 3.557728  
C -4.826363 -2.895467 2.999077  
H -5.146554 -2.645636 4.010790  
C -4.953695 -1.946886 1.981242  
C -3.258041 -3.820473 -0.920935  
H -2.821823 -2.864833 -1.261846  
C -2.094729 -4.820673 -0.848500  
H -1.534393 -4.655516 0.085118  
H -2.487102 -5.849374 -0.779260  
C -1.129649 -4.717361 -2.020954  
H -1.632199 -4.867994 -2.988749  
H -0.331020 -5.470694 -1.946991

H -0.648065 -3.726982 -2.045793  
C -4.290977 -4.212125 -1.993701  
H -4.903885 -3.329723 -2.223119  
H -3.753381 -4.444229 -2.927968  
C -5.191262 -5.377937 -1.612435  
H -5.899532 -5.611199 -2.422259  
H -5.775344 -5.151571 -0.707548  
H -4.614691 -6.294051 -1.408476  
C -5.434801 -0.533963 2.253731  
C -4.907582 0.061757 3.578678  
C -6.954304 -0.384148 2.089345  
H -4.991721 0.075257 1.446981  
H -4.771632 1.144301 3.428270  
C -5.754231 -0.127479 4.833373  
H -3.896083 -0.338295 3.753390  
H -5.239293 0.300494 5.707520  
H -6.727802 0.378889 4.751706  
H -5.959491 -1.183583 5.062163  
C -7.403422 1.061290 1.932126  
H -7.464043 -0.864369 2.941615  
H -7.271288 -0.951784 1.206051  
H -8.495940 1.132779 1.815932  
H -7.122141 1.682253 2.797050  
H -6.941765 1.508869 1.038209  
H 1.660592 1.579495 -2.879828  
H 2.058074 -0.884614 -3.066006

212

**(DIPePBDI)Ca(naphthalene)Ca(DIPePBDI) (same ring)**

Ca 2.217235 -0.358831 0.056663  
Ca -2.202952 0.225056 0.179440  
N 4.208733 0.733577 0.745690  
N 3.875260 -1.556790 -1.023706  
N -4.236243 -0.772063 0.783005  
N -3.785201 1.683541 -0.704241  
C 6.576095 1.281667 1.187102  
H 7.235964 1.680537 0.401959  
H 7.203274 0.668163 1.851179  
H 6.173024 2.121208 1.765521  
C 5.485523 0.432993 0.566693  
C 5.948366 -0.652752 -0.212111  
H 7.032064 -0.769293 -0.256414  
C 5.201069 -1.561264 -0.977525  
C 5.952218 -2.586998 -1.790467  
H 5.639720 -3.603482 -1.505334  
H 7.037755 -2.499690 -1.658846  
H 5.716264 -2.482119 -2.860719  
C 3.801800 1.799973 1.575741  
C 3.275273 2.976472 0.985095  
C 2.752620 3.964927 1.826325  
H 2.351005 4.882761 1.396064  
C 2.742197 3.806998 3.209786  
H 2.324844 4.590487 3.846562  
C 3.267135 2.650359 3.778498  
H 3.253946 2.533205 4.863664  
C 3.806061 1.636485 2.983811  
C 3.336088 3.165791 -0.521953  
H 3.000329 2.217500 -0.978652  
C 2.393912 4.259967 -1.032867  
H 1.400905 4.104595 -0.585971  
H 2.733278 5.245141 -0.671824  
C 2.243449 4.305743 -2.545119  
H 1.559234 5.112907 -2.845599

H 1.828983 3.362844 -2.929996  
H 3.201086 4.486018 -3.056117  
C 4.784106 3.375354 -1.009198  
H 5.352057 2.456313 -0.818354  
H 4.772782 3.481264 -2.106020  
C 5.498793 4.563837 -0.383113  
H 4.997964 5.517042 -0.615087  
H 6.533354 4.640260 -0.751591  
H 5.538189 4.472806 0.713340  
C 4.346867 0.355547 3.589719  
H 5.138457 -0.015994 2.923192  
C 4.982021 0.542264 4.971108  
H 4.219772 0.901603 5.683860  
H 5.280374 -0.450083 5.347118  
C 6.191049 1.466938 4.986144  
H 5.934113 2.473011 4.620886  
H 6.994381 1.078455 4.340939  
H 6.602815 1.573020 6.001631  
C 3.260023 -0.731942 3.621291  
H 2.605685 -0.558563 4.488733  
H 2.584923 -0.605484 2.757481  
C 3.804189 -2.150344 3.634134  
H 2.988345 -2.882439 3.718930  
H 4.488426 -2.319627 4.480066  
H 4.361801 -2.367038 2.708312  
C 3.142228 -2.372896 -1.904403  
C 2.581556 -3.588780 -1.440415  
C 1.670881 -4.257842 -2.267047  
H 1.230772 -5.199681 -1.933495  
C 1.340590 -3.760719 -3.525094  
H 0.627783 -4.296240 -4.155379  
C 1.954829 -2.602756 -3.999898  
H 1.726819 -2.252825 -5.008634  
C 2.867747 -1.896344 -3.212233  
C 3.054788 -4.176700 -0.123523  
H 3.926088 -3.575516 0.178160  
C 2.054141 -4.036690 1.037252  
H 2.587210 -4.251756 1.975363  
H 1.744065 -2.980479 1.110663  
C 0.809000 -4.902800 0.963723  
H 0.141300 -4.698830 1.813353  
H 1.053287 -5.976366 0.984277  
H 0.233821 -4.711877 0.047354  
C 3.559942 -5.615437 -0.314582  
H 2.728545 -6.275628 -0.613051  
H 4.256111 -5.620254 -1.170153  
C 4.254867 -6.192007 0.911212  
H 3.563588 -6.314276 1.759130  
H 5.074651 -5.536351 1.247781  
H 4.686154 -7.181556 0.695311  
C 3.587086 -0.662662 -3.726247  
H 4.489012 -0.542395 -3.109142  
C 4.069490 -0.833144 -5.172944  
H 4.610228 -1.792296 -5.239399  
H 3.212082 -0.932019 -5.858933  
C 4.971143 0.295899 -5.653392  
H 4.433788 1.254751 -5.716280  
H 5.376709 0.082734 -6.654248  
H 5.824246 0.441229 -4.970600  
C 2.781205 0.629113 -3.504274  
H 2.504703 0.683006 -2.438322  
H 3.442769 1.494349 -3.668560  
C 1.524305 0.762169 -4.342843

H 0.844938 -0.082109 -4.166566  
H 1.750256 0.791842 -5.420003  
H 0.975021 1.684660 -4.101139  
C -0.103201 -0.802779 1.407145  
C -0.173723 -1.489049 0.119798  
H -0.361286 -2.558280 0.114923  
C -0.130339 -0.760982 -1.135636  
H -0.212578 -1.314604 -2.072365  
C 0.052042 0.611736 -1.131944  
H 0.056473 1.180854 -2.061442  
C 0.229021 1.317751 0.121401  
H 0.365766 2.393920 0.114095  
C 0.132561 0.632985 1.410104  
C 0.251875 1.286371 2.644115  
H 0.478866 2.353016 2.642702  
C 0.123264 0.594315 3.866894  
C -0.143597 -0.761243 3.864669  
C -0.258646 -1.453170 2.640539  
H -0.492947 -2.518729 2.636597  
C -6.618046 -1.250594 1.217339  
H -6.241185 -2.131028 1.752012  
H -7.265167 -1.593740 0.395443  
H -7.251061 -0.665800 1.901299  
C -5.498396 -0.392164 0.667074  
C -5.904369 0.786661 0.007202  
H -6.981076 0.963032 -0.024758  
C -5.110380 1.719763 -0.683940  
C -5.855113 2.789344 -1.453709  
H -5.202854 3.628639 -1.726283  
H -6.702658 3.167353 -0.864652  
H -6.268000 2.372194 -2.386219  
C -3.844094 -1.903398 1.521622  
C -3.824130 -1.843131 2.939193  
C -3.302341 -2.926813 3.646036  
H -3.270289 -2.894008 4.736580  
C -2.812311 -4.049202 2.981326  
H -2.410009 -4.890559 3.550731  
C -2.833022 -4.097786 1.590122  
H -2.451411 -4.985248 1.084675  
C -3.336621 -3.033406 0.834559  
C -4.326639 -0.587855 3.625054  
H -5.198107 -0.238729 3.053442  
C -3.287806 0.551562 3.558769  
H -2.695254 0.554732 4.486228  
H -2.535756 0.333333 2.781973  
C -3.912934 1.914552 3.313307  
H -4.673696 2.150456 4.074780  
H -4.408717 1.947643 2.329700  
H -3.158702 2.713788 3.343543  
C -4.816386 -0.798477 5.059085  
H -3.992036 -1.185703 5.682747  
H -5.054624 0.192741 5.480984  
C -6.038194 -1.699552 5.173153  
H -6.357073 -1.817295 6.220280  
H -5.840403 -2.703307 4.767143  
H -6.888417 -1.281409 4.611016  
C -3.397996 -3.085786 -0.683213  
H -3.063004 -2.100583 -1.058447  
C -2.457137 -4.127937 -1.295148  
H -1.470868 -4.031571 -0.818425  
H -2.811781 -5.142845 -1.049699  
C -2.279632 -4.005082 -2.800222  
H -3.228688 -4.115647 -3.346127

H -1.594115 -4.778257 -3.176191  
H -1.851295 -3.028221 -3.068258  
C -4.848388 -3.242038 -1.184101  
H -5.405713 -2.334259 -0.918727  
H -4.838450 -3.263426 -2.285891  
C -5.574529 -4.467924 -0.650089  
H -6.606019 -4.511637 -1.032164  
H -5.623262 -4.454650 0.449610  
H -5.076507 -5.404992 -0.945235  
C -3.023621 2.480770 -1.575358  
C -2.204042 3.507713 -1.038637  
C -1.345120 4.189890 -1.905662  
H -0.712430 4.989058 -1.518908  
C -1.291320 3.880991 -3.262671  
H -0.618337 4.432239 -3.922514  
C -2.105494 2.876387 -3.780349  
H -2.063756 2.652525 -4.847977  
C -2.973709 2.155008 -2.956344  
C -2.317554 3.874417 0.433151  
H -2.351066 2.926739 1.003645  
C -1.118274 4.663279 0.968642  
H -0.196443 4.134180 0.687063  
H -1.059076 5.646662 0.473585  
C -1.120767 4.861628 2.477434  
H -1.949536 5.502242 2.814707  
H -0.184168 5.333823 2.809409  
H -1.206350 3.898228 3.003043  
C -3.655236 4.582766 0.727311  
H -4.472986 3.888132 0.495915  
H -3.728177 4.762686 1.811437  
C -3.858571 5.887565 -0.028538  
H -4.847933 6.318024 0.189575  
H -3.791143 5.734194 -1.117094  
H -3.105875 6.644606 0.242537  
C -3.818262 1.018484 -3.501635  
C -3.034527 -0.309137 -3.523613  
C -4.480640 1.360627 -4.841083  
H -4.634546 0.845565 -2.789317  
H -3.748851 -1.143497 -3.610314  
C -1.967988 -0.424843 -4.597729  
H -2.557075 -0.435629 -2.537278  
H -1.389987 -1.354617 -4.485407  
H -2.403343 -0.432397 -5.608921  
H -1.258822 0.411669 -5.543977  
C -5.489067 0.316922 -5.301939  
H -3.719448 1.504677 -5.625598  
H -4.980902 2.337714 -4.733137  
H -6.008393 0.639577 -6.217274  
H -5.009830 -0.649870 -5.520671  
H -6.254046 0.135474 -4.529183  
H -0.267707 -1.309165 4.801333  
H 0.234051 1.142837 4.804814

218

(<sup>Di</sup>PePBDI)Ca(anthracene)Ca(<sup>Di</sup>PePBDI) (7)

Ca -2.257082 0.195225 0.309970  
Ca 2.221572 0.112578 -0.190518  
N -4.199956 -0.591237 -0.766461  
N -3.948090 1.220323 1.493231  
N 4.214497 -0.540670 0.834035  
N 3.827014 0.915294 -1.649860  
C -6.542489 -1.112559 -1.342419  
H -7.225629 -0.356724 -1.758231

H -7.151067 -1.791357 -0.726560  
H -6.109011 -1.687385 -2.168787  
C -5.485788 -0.443643 -0.490296  
C -5.986608 0.342589 0.573823  
H -7.072575 0.357701 0.675232  
C -5.272708 1.134118 1.485575  
C -6.056200 1.925986 2.502943  
H -5.752119 1.643175 3.522686  
H -7.137094 1.770302 2.399784  
H -5.842230 3.001556 2.405786  
C -3.750084 -1.414904 -1.822283  
C -3.228686 -0.806824 -2.992384  
C -2.677999 -1.629625 -3.980684  
H -2.286076 -1.185928 -4.896474  
C -2.627655 -3.012220 -3.823604  
H -2.189235 -3.636169 -4.605882  
C -3.135615 -3.596994 -2.668106  
H -3.080860 -4.679738 -2.545606  
C -3.706142 -2.821549 -1.656396  
C -3.321516 0.699133 -3.177824  
H -3.020074 1.164657 -2.221416  
C -2.367898 1.239443 -4.248876  
H -1.384417 0.762391 -4.125149  
H -2.721278 0.936556 -5.248688  
C -2.180604 2.747786 -4.212224  
H -1.526023 3.082472 -5.030166  
H -1.713364 3.062973 -3.268049  
H -3.132323 3.290689 -4.314267  
C -4.775402 1.154635 -3.420470  
H -5.353200 0.981829 -2.503216  
H -4.780335 2.247798 -3.561360  
C -5.463945 0.480252 -4.598065  
H -4.945839 0.678590 -5.549602  
H -6.498105 0.841189 -4.707827  
H -5.500697 -0.611952 -4.467178  
C -4.214625 -3.460058 -0.377557  
H -4.985772 -2.798860 0.045514  
C -4.859110 -4.834210 -0.590919  
H -4.095914 -5.543768 -0.954046  
H -5.166516 -5.223463 0.392922  
C -6.061587 -4.833666 -1.523906  
H -5.797806 -4.456231 -2.523781  
H -6.867984 -4.194157 -1.132800  
H -6.472854 -5.847578 -1.646109  
C -3.075390 -3.534943 0.650494  
H -2.373903 -4.324858 0.343679  
H -2.479794 -2.607462 0.596836  
C -3.518238 -3.754504 2.086523  
H -2.644897 -3.786822 2.754470  
H -4.060324 -4.704180 2.211729  
H -4.181753 -2.943144 2.428358  
C -3.244533 2.098798 2.337485  
C -2.698960 1.619601 3.554453  
C -1.811576 2.445189 4.254907  
H -1.383429 2.099700 5.197941  
C -1.489252 3.716471 3.786545  
H -0.794863 4.346051 4.346624  
C -2.088793 4.204394 2.626376  
H -1.868676 5.222594 2.299411  
C -2.978626 3.418134 1.889416  
C -3.154019 0.279254 4.101402  
H -4.016255 -0.021314 3.487101  
C -2.129239 -0.856465 3.931269

H -2.644332 -1.812933 4.104520  
H -1.806311 -0.892709 2.876737  
C -0.895758 -0.788185 4.814461  
H -0.210527 -1.618744 4.593117  
H -1.153675 -0.847823 5.883208  
H -0.334221 0.144183 4.661732  
C -3.669435 0.416136 5.542375  
H -2.847804 0.711157 6.216163  
H -4.383442 1.256486 5.569265  
C -4.341163 -0.841226 6.076838  
H -3.633215 -1.678490 6.174238  
H -5.151967 -1.173077 5.407820  
H -4.779646 -0.665830 7.071160  
C -3.683727 3.944003 0.652907  
H -4.566082 3.306358 0.498906  
C -4.207333 5.373105 0.848937  
H -4.771231 5.400395 1.796560  
H -3.370208 6.077392 0.985979  
C -5.095248 5.860255 -0.288034  
H -4.538393 5.961448 -1.232383  
H -5.530669 6.844840 -0.058779  
H -5.927445 5.160720 -0.470204  
C -2.845839 3.774828 -0.626666  
H -2.532371 2.719704 -0.697465  
H -3.495821 3.935363 -1.501305  
C -1.615122 4.657088 -0.721717  
H -0.939251 4.484910 0.126602  
H -1.877245 5.726316 -0.730324  
H -1.048929 4.455765 -1.643749  
C 0.094122 -1.070439 0.798461  
C 0.139864 0.209423 1.475173  
H 0.289817 0.213028 2.551089  
C 0.091333 1.459838 0.762917  
H 0.146335 2.393487 1.324059  
C -0.067559 1.461383 -0.619193  
H -0.075706 2.392795 -1.184388  
C -0.205645 0.216831 -1.326854  
H -0.319013 0.232543 -2.406574  
C -0.106143 -1.067750 -0.664668  
C -0.170820 -2.286807 -1.327628  
H -0.361216 -2.286105 -2.400858  
C -0.032341 -3.540948 -0.657327  
C -0.089184 -4.768257 -1.340261  
H -0.256265 -4.759299 -2.420055  
C 0.066845 -5.976773 -0.662116  
H 0.022951 -6.920263 -1.211831  
C 0.280304 -5.979561 0.721434  
H 0.400216 -6.925342 1.255681  
C 0.338491 -4.773642 1.419339  
H 0.502408 -4.769332 2.499740  
C 0.187081 -3.543644 0.756466  
C 0.247268 -2.292210 1.443714  
H 0.449740 -2.294484 2.515461  
C 6.579686 -1.006964 1.357715  
H 6.179171 -1.530342 2.234380  
H 7.228379 -0.188847 1.707172  
H 7.216482 -1.702421 0.791096  
C 5.484056 -0.450741 0.473470  
C 5.920192 0.189786 -0.706529  
H 6.999960 0.201825 -0.865126  
C 5.152788 0.873515 -1.665917  
C 5.921267 1.611404 -2.740395  
H 5.295471 1.828402 -3.615558

H 6.797895 1.029889 -3.057965  
H 6.291513 2.574081 -2.352391  
C 3.788876 -1.258826 1.967993  
C 3.753386 -2.677287 1.931927  
C 3.205930 -3.357313 3.019962  
H 3.162543 -4.447077 3.004028  
C 2.702719 -2.667570 4.120775  
H 2.280754 -3.217714 4.965340  
C 2.735369 -1.276147 4.144088  
H 2.343623 -0.750933 5.015472  
C 3.265784 -0.545941 3.075134  
C 4.268205 -3.399509 0.702146  
H 5.154800 -2.850085 0.354062  
C 3.246849 -3.348943 -0.451299  
H 2.613292 -4.247462 -0.410887  
H 2.537368 -2.521451 -0.287597  
C 3.891309 -3.205004 -1.818807  
H 4.615991 -4.012459 -2.010722  
H 4.430560 -2.247372 -1.901355  
H 3.137712 -3.244547 -2.618127  
C 4.724058 -4.837708 0.956285  
H 3.875768 -5.433048 1.335007  
H 4.973627 -5.286611 -0.019823  
C 5.924472 -4.957330 1.884868  
H 6.218728 -6.008136 2.031011  
H 5.715812 -4.526758 2.876251  
H 6.795263 -4.422138 1.473263  
C 3.339708 0.972378 3.104138  
H 3.028479 1.338182 2.107118  
C 2.383302 1.610826 4.116742  
H 1.398359 1.129822 4.024253  
H 2.726608 1.394864 5.142112  
C 2.205611 3.111565 3.947873  
H 3.152965 3.661379 4.053402  
H 1.510300 3.509866 4.700786  
H 1.789689 3.350163 2.957976  
C 4.791004 1.463989 3.281338  
H 5.362369 1.183858 2.386561  
H 4.789692 2.566093 3.291372  
C 5.490597 0.936267 4.525241  
H 6.523117 1.313203 4.585022  
H 5.533303 -0.163653 4.521775  
H 4.976788 1.241979 5.450298  
C 3.084480 1.767600 -2.484564  
C 2.273856 1.205937 -3.506028  
C 1.430882 2.058862 -4.224950  
H 0.804430 1.653478 -5.019835  
C 1.382738 3.424761 -3.956875  
H 0.722885 4.072818 -4.537211  
C 2.183246 3.965509 -2.953952  
H 2.143314 5.038839 -2.759099  
C 3.034996 3.156729 -2.196538  
C 2.374215 -0.278955 -3.823009  
H 2.385005 -0.822336 -2.858318  
C 1.180889 -0.823567 -4.615507  
H 0.254541 -0.543898 -4.092080  
H 1.123765 -0.332478 -5.600888  
C 1.192818 -2.332581 -4.813228  
H 2.013010 -2.661538 -5.468792  
H 0.251091 -2.671132 -5.269854  
H 1.300105 -2.859479 -3.853019  
C 3.719206 -0.612348 -4.498892  
H 4.529028 -0.358748 -3.802834



H 3.785699 -1.703316 -4.631848  
C 3.945592 0.087135 -5.830986  
H 4.940086 -0.153254 -6.236958  
H 3.881369 1.181621 -5.724957  
H 3.202913 -0.212607 -6.587143  
C 3.856140 3.727250 -1.055415  
C 3.045513 3.771644 0.255189  
C 4.518264 5.063926 -1.409459  
H 4.672307 3.022328 -0.852628  
H 3.739971 3.906742 1.099714  
C 1.945238 4.815542 0.313893  
H 2.593658 2.776948 0.410253  
H 1.370367 4.733851 1.248636  
H 2.348803 5.838862 0.269182  
H 1.239841 4.696444 -0.519278  
C 5.501348 5.552914 -0.354436  
H 3.756201 5.840855 -1.585961  
H 5.039873 4.939054 -2.373252  
H 6.024862 6.462025 -0.687567  
H 4.999891 5.793810 0.595666  
H 6.264609 4.787723 -0.137300

218

**(DIPePBDI)Ca(anthracene)Ca(DIPePBDI) (different rings)**

Ca -3.291308 -0.025321 0.105967  
Ca 3.255529 -0.141331 -0.073122  
N -5.319110 -1.117920 -0.270496  
N -4.371617 1.387527 -1.378299  
N 4.035007 1.354163 1.531113  
N 5.088284 -1.261052 0.791895  
C -7.531189 -1.806508 -1.112311  
H -7.522554 -2.271367 -2.111082  
H -8.496269 -1.291415 -1.003816  
H -7.466916 -2.607277 -0.366214  
C -6.381659 -0.828058 -1.006171  
C -6.502917 0.342782 -1.783886  
H -7.432619 0.441786 -2.345556  
C -5.544921 1.351190 -1.995288  
C -5.864340 2.412486 -3.018259  
H -5.684332 3.417921 -2.609914  
H -6.902864 2.346002 -3.365327  
H -5.198279 2.308813 -3.888387  
C -5.268180 -2.226331 0.594809  
C -4.358938 -3.279493 0.319284  
C -4.216167 -4.297588 1.268462  
H -3.532786 -5.124420 1.074584  
C -4.924198 -4.276548 2.465886  
H -4.788737 -5.078484 3.195282  
C -5.804493 -3.230509 2.731684  
H -6.350849 -3.218553 3.676989  
C -5.998625 -2.198388 1.812318  
C -3.571835 -3.298784 -0.985094  
H -3.130057 -2.292521 -1.133974  
C -2.385152 -4.270090 -0.962407  
H -1.819907 -4.103495 -0.032567  
H -2.756424 -5.306925 -0.906001  
C -1.433575 -4.138125 -2.142846  
H -0.575243 -4.816991 -2.024551  
H -1.034916 -3.116329 -2.218071  
H -1.915375 -4.387442 -3.100277  
C -4.490825 -3.519765 -2.203061  
H -5.161823 -2.655118 -2.291602  
H -3.873514 -3.504853 -3.115464

C -5.305790 -4.803447 -2.149363  
H -4.665241 -5.698899 -2.121734  
H -5.955276 -4.893437 -3.033521  
H -5.947963 -4.830257 -1.255525  
C -6.903245 -1.020639 2.129363  
H -7.298377 -0.635027 1.178407  
C -8.114137 -1.381689 2.994963  
H -7.774227 -1.750436 3.978308  
H -8.668352 -0.454292 3.212232  
C -9.059650 -2.389013 2.355624  
H -8.547984 -3.337239 2.130390  
H -9.467355 -2.001971 1.408747  
H -9.910718 -2.615695 3.016021  
C -6.081867 0.125853 2.744647  
H -5.851760 -0.121995 3.795948  
H -5.102255 0.165120 2.243406  
C -6.737827 1.494075 2.639562  
H -6.112373 2.270020 3.105496  
H -7.720693 1.524649 3.134437  
H -6.884551 1.771963 1.583424  
C -3.339414 2.261667 -1.785531  
C -3.137926 3.491338 -1.112883  
C -1.978889 4.220760 -1.400375  
H -1.801695 5.171720 -0.894324  
C -1.058580 3.772748 -2.345854  
H -0.154419 4.352943 -2.544041  
C -1.305479 2.601765 -3.056843  
H -0.599890 2.279068 -3.824114  
C -2.441763 1.829622 -2.797401  
C -4.211656 4.022081 -0.179939  
H -5.118631 3.437131 -0.396085  
C -3.922613 3.765313 1.308450  
H -4.835582 3.987711 1.883668  
H -3.754613 2.684951 1.440773  
C -2.751631 4.534053 1.898416  
H -2.579947 4.246947 2.947242  
H -2.924471 5.621434 1.881177  
H -1.822365 4.337054 1.344929  
C -4.547764 5.488559 -0.489209  
H -3.681161 6.135084 -0.272681  
H -4.712333 5.577055 -1.576347  
C -5.767943 6.012476 0.255644  
H -5.602182 6.054786 1.343163  
H -6.646572 5.369825 0.081557  
H -6.028433 7.029800 -0.074435  
C -2.763799 0.585142 -3.601419  
H -3.752017 0.247458 -3.259336  
C -2.920240 0.909962 -5.094297  
H -3.548890 1.811053 -5.188405  
H -1.945195 1.189958 -5.526096  
C -3.541723 -0.226514 -5.894275  
H -2.910045 -1.128025 -5.886096  
H -3.694715 0.059049 -6.946453  
H -4.521966 -0.509028 -5.476519  
C -1.816836 -0.604477 -3.332958  
H -1.575883 -0.634745 -2.254573  
H -2.375149 -1.532025 -3.538846  
C -0.510633 -0.636020 -4.111051  
H 0.122979 0.232960 -3.890187  
H -0.682747 -0.673601 -5.197599  
H 0.075892 -1.523174 -3.835831  
C 0.889223 0.429747 -1.103287  
C 1.793046 1.077599 -1.981063

H 1.759663 2.165665 -2.027194  
C 2.749183 0.358735 -2.739300  
H 3.433662 0.896558 -3.397424  
C 2.804462 -1.030467 -2.644520  
H 3.546105 -1.602578 -3.204006  
C 1.891087 -1.711564 -1.804422  
H 1.950996 -2.798039 -1.728427  
C 0.922953 -1.025561 -1.030650  
C 0.061552 -1.668075 -0.109363  
H 0.067852 -2.756410 -0.068814  
C -0.778965 -0.965101 0.784069  
C -1.682591 -1.595514 1.674288  
H -1.754029 -2.683649 1.670824  
C -2.476568 -0.859685 2.588620  
H -3.152896 -1.393434 3.258792  
C -2.395028 0.530469 2.608510  
H -2.986646 1.111376 3.319417  
C -1.544388 1.197259 1.689944  
H -1.480817 2.282778 1.688577  
C -0.740409 0.490795 0.762233  
C 0.059282 1.135038 -0.204707  
H 0.069349 2.224847 -0.231910  
C 5.246309 2.424875 3.393673  
H 4.518258 3.235540 3.266752  
H 6.255980 2.834778 3.237121  
H 5.201763 2.069811 4.434145  
C 4.999632 1.281132 2.433152  
C 5.879226 0.183269 2.552181  
H 6.634255 0.268862 3.335539  
C 5.950872 -0.976626 1.759166  
C 7.106332 -1.912281 2.038605  
H 6.894045 -2.934571 1.699660  
H 7.344314 -1.927852 3.110911  
H 8.009901 -1.572894 1.506644  
C 3.108331 2.413371 1.473222  
C 2.047229 2.475070 2.414251  
C 1.074563 3.462857 2.254866  
H 0.253774 3.529080 2.969628  
C 1.127404 4.361316 1.191879  
H 0.357335 5.127893 1.084239  
C 2.163533 4.284308 0.266504  
H 2.192560 4.999140 -0.556618  
C 3.168208 3.317723 0.383013  
C 1.995489 1.459210 3.539941  
H 3.029927 1.316321 3.884974  
C 1.509745 0.075420 3.059433  
H 0.425796 -0.005013 3.228725  
H 1.607757 -0.000213 1.963669  
C 2.245121 -1.074446 3.725238  
H 2.182917 -1.007092 4.823374  
H 3.312625 -1.071291 3.452090  
H 1.817466 -2.043338 3.432453  
C 1.194542 1.911056 4.762987  
H 0.150728 2.111978 4.466888  
H 1.134434 1.055893 5.456989  
C 1.789623 3.107109 5.493216  
H 1.182999 3.389041 6.367713  
H 1.863701 3.988568 4.838211  
H 2.806581 2.881607 5.852633  
C 4.331802 3.254382 -0.593531  
H 4.497433 2.188484 -0.842640  
C 4.058516 3.971981 -1.920230  
H 3.058064 3.684542 -2.278389

H 4.012885 5.061273 -1.754944  
C 5.077272 3.670696 -3.010376  
H 6.083636 4.034577 -2.754122  
H 4.790616 4.146209 -3.960553  
H 5.155898 2.587666 -3.189839  
C 5.646280 3.724273 0.062670  
H 5.908012 3.014079 0.857804  
H 6.457807 3.641109 -0.678510  
C 5.602531 5.136134 0.628147  
H 6.562703 5.401696 1.096438  
H 4.816509 5.234387 1.392604  
H 5.399456 5.888366 -0.150384  
C 5.282647 -2.329750 -0.102382  
C 4.409376 -3.446645 -0.046511  
C 4.528049 -4.433669 -1.030171  
H 3.870243 -5.303147 -1.003639  
C 5.478453 -4.335459 -2.042413  
H 5.556977 -5.121550 -2.797068  
C 6.329150 -3.233834 -2.089991  
H 7.071731 -3.166555 -2.887301  
C 6.242790 -2.212075 -1.140481  
C 3.407934 -3.572715 1.090413  
H 2.957909 -2.573608 1.251942  
C 2.246930 -4.525880 0.785092  
H 1.824896 -4.256912 -0.195874  
H 2.623198 -5.556126 0.673780  
C 1.137762 -4.512007 1.828341  
H 1.471362 -4.919079 2.794732  
H 0.282367 -5.120753 1.497326  
H 0.767287 -3.490744 2.004474  
C 4.117979 -3.921020 2.414327  
H 4.796497 -3.096289 2.670176  
H 3.370208 -3.940197 3.222138  
C 4.887927 -5.233223 2.392168  
H 5.397925 -5.404418 3.352495  
H 5.652694 -5.237040 1.599724  
H 4.227932 -6.096924 2.214347  
C 7.107599 -0.970130 -1.243995  
C 6.453044 0.091753 -2.149658  
C 8.560363 -1.284303 -1.620874  
H 7.138862 -0.505114 -0.249886  
H 6.975284 1.051173 -2.004039  
C 6.389413 -0.242007 -3.630559  
H 5.426974 0.265013 -1.782765  
H 5.887431 0.559465 -4.193393  
H 7.393566 -0.363083 -4.065847  
H 5.832385 -1.173041 -3.810573  
C 9.487134 -0.079236 -1.533835  
H 8.615143 -1.712613 -2.635288  
H 8.921239 -2.079039 -0.946427  
H 10.533699 -0.367382 -1.716135  
H 9.227905 0.694364 -2.273059  
H 9.438006 0.389481 -0.537235

242

(DIPePBDI\*)Mg(C<sub>6</sub>H<sub>6</sub>)Mg(DIPePBDI\*)  
N 3.732191 1.149616 0.927605  
N -3.616856 1.572806 -0.488937  
C 5.045619 1.034513 0.767080  
C 6.133645 1.992360 1.365236  
C 3.024487 2.071021 1.735993  
C 2.483722 1.599458 2.963483  
C 1.701136 2.468094 3.727004

H 1.301735 2.134554 4.684787  
C 1.391553 3.748510 3.276253  
H 0.764858 4.407236 3.881620  
C 1.870239 4.174665 2.044556  
H 1.605964 5.170313 1.684368  
C 2.702840 3.364085 1.264825  
C 2.741675 0.170235 3.414916  
H 2.647358 -0.457261 2.510412  
C 1.684152 -0.333495 4.402584  
H 1.756833 0.240927 5.342343  
H 0.688909 -0.113367 3.987174  
C 4.180062 -0.031163 3.942954  
H 4.161716 -0.018486 5.047262  
C 4.866936 -1.291721 3.435420  
C 3.230176 3.909318 -0.052271  
H 4.141380 3.347234 -0.306513  
C 2.198829 3.620567 -1.155260  
H 2.142723 2.528751 -1.277790  
H 1.206601 3.917743 -0.783315  
C 3.608903 5.402638 0.058668  
H 3.860907 5.631913 1.106691  
C 4.781175 5.836079 -0.813190  
C -4.937760 1.435652 -0.546620  
C -5.948748 2.575657 -0.910035  
C -2.912618 2.798119 -0.408038  
C -2.255219 3.320608 -1.546223  
C -1.377583 4.392793 -1.357689  
H -0.852400 4.818431 -2.211506  
C -1.173502 4.950867 -0.098034  
H -0.470170 5.777130 0.024047  
C -1.900021 4.485053 0.994305  
H -1.775376 4.967558 1.964711  
C -2.792622 3.417768 0.859361  
C -2.651904 2.824609 -2.930206  
H -3.709458 2.535934 -2.823966  
C -1.941964 1.545514 -3.376849  
H -0.870718 1.741984 -3.521546  
H -1.996567 0.815083 -2.557688  
C -2.619846 3.927020 -4.010048  
C -1.295344 4.148441 -4.735323  
H -3.383986 3.682710 -4.766578  
C -3.674154 2.967057 2.012227  
H -4.559379 2.493665 1.564210  
C -3.028506 1.873475 2.867638  
H -2.734030 1.038828 2.218677  
C -1.822997 2.328474 3.675962  
C -4.194922 4.151531 2.838124  
H -4.630152 4.888569 2.142475  
C -5.231495 3.763108 3.883659  
Mg 2.295647 -0.077606 -0.007737  
Mg -2.253255 0.013512 -0.057163  
N 3.790073 -1.250503 -0.912489  
N -3.830220 -1.352634 0.250252  
C 5.619862 0.010361 -0.017669  
H 6.700248 0.051848 -0.037503  
C 5.097491 -1.059283 -0.775646  
C 6.231495 -1.941763 -1.409569  
C 3.129640 -2.289176 -1.608400  
C 2.484579 -1.971381 -2.832360  
C 1.754435 -2.973636 -3.476467  
H 1.274287 -2.762674 -4.431619  
C 1.609927 -4.239350 -2.915373  
H 1.025612 -5.003927 -3.432594

C 2.201531 -4.521715 -1.688744  
H 2.074408 -5.512538 -1.249943  
C 2.970250 -3.565867 -1.017026  
C 2.569386 -0.559312 -3.391756  
H 2.319294 0.110249 -2.547181  
C 1.523943 -0.276667 -4.474051  
H 1.717880 -0.917924 -5.351690  
H 0.533044 -0.571134 -4.095013  
C 3.990484 -0.168351 -3.853939  
H 4.700794 -0.931289 -3.518139  
H 4.034455 -0.200196 -4.956989  
C 3.629376 -3.892559 0.310120  
H 4.491236 -3.219237 0.409920  
C 2.720208 -3.550942 1.499421  
H 2.452709 -2.485167 1.427838  
C 1.448464 -4.369863 1.600163  
C 4.177747 -5.324981 0.371181  
C 4.988740 -5.621897 1.625613  
H 3.355738 -6.055200 0.296995  
C -5.576067 0.201960 -0.316896  
H -6.651755 0.255091 -0.415217  
C -5.120833 -1.067643 0.087758  
C -6.303822 -2.037670 0.420592  
C -3.276157 -2.653030 0.376097  
C -2.770396 -3.101287 1.614980  
C -2.014440 -4.278435 1.643253  
H -1.615353 -4.631402 2.596875  
C -1.783179 -5.017761 0.489668  
H -1.179209 -5.926405 0.529368  
C -2.358790 -4.611107 -0.712296  
H -2.217240 -5.223081 -1.604261  
C -3.122671 -3.444103 -0.791908  
C -3.137316 -2.430519 2.927942  
H -3.877541 -1.645899 2.697423  
C -1.919073 -1.745498 3.563917  
H -1.100174 -2.481600 3.631156  
H -1.560005 -0.976344 2.867091  
C -3.798564 -3.455177 3.884839  
H -4.178512 -4.305371 3.296581  
H -3.023230 -3.886441 4.541944  
C -3.828925 -3.059569 -2.079810  
H -4.692850 -2.443206 -1.794545  
C -2.979037 -2.154769 -2.981029  
H -2.679430 -1.274041 -2.390876  
C -1.744813 -2.808853 -3.573365  
C -4.399655 -4.278785 -2.817658  
H -4.993573 -4.867579 -2.098355  
C -5.261453 -3.924355 -4.022087  
H 2.724208 6.022982 -0.169206  
H 4.786500 0.837839 3.657927  
C 1.763483 -1.816398 4.731191  
H 4.803650 -5.497682 -0.520406  
H 3.306552 -3.650801 2.425156  
C 4.449006 1.189838 -3.342756  
C 1.464168 1.173848 -4.928884  
C -4.942800 -2.902604 4.724946  
C -2.143421 -1.123379 4.933537  
H -3.587824 -4.948413 -3.144131  
C 2.432313 4.269934 -2.509530  
H -3.619202 -1.758000 -3.783766  
C -2.539860 0.920377 -4.627396  
H -2.956416 4.872293 -3.553081  
H -3.360972 4.673529 3.334360

H -3.796613 1.449588 3.543463  
C -6.554483 2.213652 -2.281354  
C -7.073955 2.644498 0.141537  
C -5.392283 4.001270 -1.023726  
C -7.274213 -2.153403 -0.768978  
C -5.935342 -3.469311 0.822862  
C -7.043892 -1.413514 1.623028  
C -0.095631 1.273649 0.275459  
C 0.398015 0.764097 -1.012225  
C -0.190586 -0.572614 -1.281553  
C -0.146007 -1.479026 -0.246911  
C -0.116834 0.365967 1.308334  
C 0.400190 -0.989404 1.019211  
H 0.339172 1.472740 -1.839283  
H -0.444956 -0.888575 -2.292535  
H -0.425871 -2.526766 -0.385340  
H -0.324466 0.689442 2.327715  
H 0.356251 -1.695497 1.849498  
H -0.305953 2.332431 0.438361  
H -1.370758 1.493210 4.227501  
H -1.046165 2.747430 3.022930  
H -2.089784 3.098347 4.416773  
H -5.656273 4.654051 4.370608  
H -6.065519 3.201118 3.432597  
H -4.801626 3.131458 4.675940  
H 5.889760 -1.379639 3.833771  
H 4.322098 -2.200901 3.722451  
H 4.938890 -1.278344 2.336543  
H 0.930369 -2.115363 5.385443  
H 1.710012 -2.429037 3.820368  
H 2.696271 -2.075331 5.254065  
H 5.452978 -6.618458 1.570405  
H 5.797010 -4.886278 1.766478  
H 4.366366 -5.600753 2.532996  
H 0.848246 -4.056746 2.466986  
H 0.819077 -4.240467 0.710137  
H 1.651900 -5.446572 1.716805  
H -5.333610 -3.668019 5.413521  
H -4.641248 -2.035539 5.328661  
H -5.777894 -2.581017 4.084361  
H -1.233847 -0.608364 5.276551  
H -2.956896 -0.382069 4.915817  
H -2.392566 -1.876911 5.695487  
H -2.028791 -0.019192 -4.882283  
H -3.607099 0.689782 -4.480882  
H -2.461204 1.582374 -5.502706  
H -1.369704 5.006042 -5.421320  
H -0.458215 4.347835 -4.051865  
H -1.007808 3.274522 -5.337405  
H -5.738800 -4.821731 -4.444314  
H -6.063101 -3.218184 -3.751093  
H -4.673372 -3.457908 -4.826986  
H -1.180011 -2.098066 -4.193915  
H -1.060544 -3.171532 -2.793795  
H -2.002542 -3.663872 -4.218015  
H 5.457366 1.442607 -3.706001  
H 3.770887 1.992027 -3.661479  
H 4.483260 1.198031 -2.242092  
H 0.634692 1.328223 -5.635149  
H 1.308982 1.851844 -4.076630  
H 2.388226 1.488958 -5.435937  
H 4.963056 6.918151 -0.718914  
H 5.705121 5.321025 -0.510009

H 4.619974 5.618695 -1.877604  
H 2.368994 5.368114 -2.463092  
H 3.413542 4.008645 -2.932911  
H 1.668648 3.933278 -3.227011  
H -7.288456 2.978561 -2.580549  
H -5.774822 2.173251 -3.057170  
H -7.061068 1.239087 -2.267128  
H -7.744678 3.484741 -0.094780  
H -7.689809 1.736895 0.180360  
H -6.664499 2.816384 1.147771  
H -6.225335 4.664690 -1.303735  
H -4.976825 4.372809 -0.080405  
H -4.621976 4.106582 -1.792840  
H -8.105126 -2.822718 -0.497620  
H -7.711224 -1.191881 -1.068490  
H -6.774551 -2.584451 -1.648241  
H -6.865832 -4.000333 1.077320  
H -5.443181 -4.028562 0.019814  
H -5.286602 -3.507348 1.701795  
H -7.842632 -2.090360 1.965420  
H -6.352627 -1.250657 2.462738  
H -7.498406 -0.444950 1.376948  
C 7.166291 -1.054896 -2.259219  
C 7.066898 -2.559061 -0.270220  
C 5.786696 -3.095050 -2.318868  
C 7.167030 1.190329 2.181629  
C 6.866676 2.656839 0.181401  
C 5.638616 3.114545 2.286391  
H 7.864573 -3.188790 -0.695035  
H 7.538428 -1.795025 0.362000  
H 6.451555 -3.194698 0.380882  
H 7.970659 -1.678114 -2.680021  
H 6.631291 -0.588851 -3.096656  
H 7.639345 -0.252235 -1.679499  
H 6.688905 -3.553004 -2.753673  
H 5.248514 -3.879398 -1.780087  
H 5.147401 -2.772523 -3.149211  
H 7.968292 1.868532 2.514360  
H 6.714848 0.744915 3.076882  
H 7.634660 0.380901 1.607168  
H 7.564127 3.422783 0.556480  
H 7.445679 1.933331 -0.407746  
H 6.160713 3.146882 -0.502988  
H 6.520117 3.632065 2.696159  
H 5.037120 3.862003 1.762636  
H 5.046082 2.748399 3.133479

24

**anthracene**

C -1.222776 0.721555 -0.000043  
C -1.222699 -0.721517 0.000041  
C 0.000043 -1.402963 0.000238  
C 1.222900 -0.721561 0.000310  
C 0.000010 1.402975 0.000128  
C 1.222831 0.721483 0.000349  
H 0.000063 -2.496569 0.000228  
H 0.000142 2.496566 0.000111  
C -2.476176 -1.406182 -0.000142  
C -3.657857 -0.712231 -0.000148  
C -2.476480 1.406223 -0.000002  
C -3.658009 0.712088 -0.000142  
H -2.473806 -2.499308 -0.000238  
H -4.609193 -1.249643 0.000117

H -2.474364 2.499353 0.000230  
H -4.609434 1.249372 -0.000374  
C 2.476292 -1.406199 -0.000085  
C 3.657858 -0.712011 -0.000279  
C 2.476211 1.406165 0.000019  
C 3.657851 0.712185 -0.000274  
H 2.474261 -2.499329 0.000683  
H 4.609184 -1.249455 -0.000369  
H 2.473998 2.499293 0.000202  
H 4.609158 1.249658 -0.000415

18

**naphthalene**

C 0.000011 -0.716181 0.000183  
C 0.000008 0.716100 0.000007  
C 1.243260 1.401790 -0.000312  
C 2.432262 0.707717 -0.000108  
C 1.243264 -1.401790 0.000197  
C 2.432229 -0.707660 0.000189  
H 1.240480 2.495043 -0.000979  
H 3.381840 1.248331 -0.000196  
H 1.240516 -2.495055 0.000401  
H 3.381786 -1.248335 0.000247  
C -1.243334 1.401846 0.000226  
C -2.432228 0.707756 0.000182  
C -1.243309 -1.401827 -0.000417  
C -2.432156 -0.707739 -0.000175  
H -1.240442 2.495121 0.000781  
H -3.381967 1.248103 0.000423  
H -1.240421 -2.495082 -0.000203  
H -3.381835 -1.248193 -0.000311

248

**(DIPePBDI\*)Mg(naphthalene)Mg(DIPePBDI\*) same ring**

Mg -2.579352 0.041659 -0.001106  
Mg 2.564133 -0.194897 0.090083  
N -4.224406 -1.055754 0.723602  
N -3.811949 1.404239 -0.996761  
N 4.123885 0.995043 0.842107  
N 3.886994 -1.562926 -0.730660  
C -6.753199 -1.478857 1.088245  
C -7.650026 -1.909416 -0.093808  
C -7.579411 -0.522198 1.971900  
C -6.479167 -2.747112 1.904904  
C -5.495560 -0.715285 0.536611  
C -5.861846 0.395946 -0.253729  
H -6.932998 0.525469 -0.329451  
C -5.140626 1.324314 -1.029566  
C -6.081525 2.229120 -1.894714  
C -5.419023 3.144131 -2.931200  
C -6.882411 3.126757 -0.933273  
C -7.048813 1.334730 -2.697654  
C -3.720887 -2.092078 1.548146  
C -3.159070 -3.249208 0.951900  
C -2.608413 -4.222741 1.793439  
H -2.193755 -5.133598 1.361788  
C -2.572761 -4.053549 3.174432  
H -2.144013 -4.830511 3.811483  
C -3.064651 -2.881825 3.739676  
H -2.997192 -2.739900 4.818758  
C -3.636791 -1.885428 2.948089  
C -3.170918 -3.427798 -0.559355  
H -2.868648 -2.454248 -0.981548

C -2.154634 -4.460384 -1.054587  
H -1.167824 -4.190922 -0.655390  
H -2.391342 -5.450737 -0.632158  
C -2.060044 -4.587663 -2.567593  
H -1.308413 -5.341203 -2.847437  
H -1.759954 -3.638178 -3.032308  
H -3.012951 -4.899248 -3.021472  
C -4.582000 -3.704415 -1.099978  
H -5.240113 -2.910021 -0.732795  
H -4.576253 -3.587264 -2.196176  
C -5.147633 -5.067572 -0.729837  
H -4.616014 -5.886748 -1.238108  
H -6.210306 -5.145429 -1.006926  
H -5.071291 -5.251829 0.353724  
C -4.205180 -0.612897 3.542015  
H -5.176025 -0.464763 3.049969  
C -4.484205 -0.670137 5.046600  
H -3.546462 -0.895721 5.583098  
H -4.758484 0.348158 5.369875  
C -5.587934 -1.630856 5.468576  
H -5.368587 -2.667610 5.172145  
H -6.549298 -1.355808 5.007541  
H -5.729925 -1.620046 6.560336  
C -3.375820 0.644382 3.215807  
H -2.686038 0.847243 4.047631  
H -2.694301 0.458258 2.369986  
C -4.257246 1.849626 2.933698  
H -3.665872 2.767761 2.836339  
H -4.982597 2.008586 3.748209  
H -4.830733 1.710268 2.003190  
C -2.997723 2.218731 -1.824355  
C -2.562258 3.493442 -1.387922  
C -1.630025 4.173436 -2.180736  
H -1.295401 5.168036 -1.880803  
C -1.151264 3.628780 -3.369415  
H -0.434632 4.183334 -3.976381  
C -1.625442 2.396236 -3.809162  
H -1.289036 2.004529 -4.770692  
C -2.558133 1.677646 -3.057214  
C -3.196156 4.165570 -0.179456  
H -4.057384 3.539282 0.098725  
C -2.308314 4.204089 1.075859  
H -2.944572 4.489389 1.928575  
H -1.970696 3.179302 1.284062  
C -1.111447 5.140640 1.032128  
H -0.519362 5.052999 1.955278  
H -1.413750 6.194977 0.932028  
H -0.436870 4.910501 0.195798  
C -3.745646 5.557337 -0.539906  
H -2.919095 6.225028 -0.833101  
H -4.375735 5.467004 -1.438755  
C -4.552318 6.213649 0.572573  
H -3.929644 6.463386 1.444860  
H -5.359847 5.552112 0.926329  
H -5.017769 7.148451 0.224289  
C -3.169199 0.386484 -3.571454  
H -4.131116 0.268645 -3.051580  
C -3.494310 0.439232 -5.069635  
H -4.057384 1.365972 -5.270006  
H -2.569592 0.522973 -5.663113  
C -4.298162 -0.759230 -5.555322  
H -3.728791 -1.697831 -5.473269  
H -4.588899 -0.643159 -6.610538

H -5.221702 -0.884155 -4.966767  
C -2.340547 -0.851019 -3.189713  
H -2.063411 -0.788769 -2.122258  
H -2.975953 -1.745781 -3.274459  
C -1.057889 -1.036295 -3.974474  
H -0.447104 -0.126835 -3.926159  
H -1.246501 -1.262587 -5.035567  
H -0.452328 -1.855226 -3.562389  
C -0.057742 1.003736 1.759341  
C -0.018302 1.839457 0.564709  
H 0.024563 2.917115 0.691473  
C 0.330843 1.272281 -0.641175  
H 0.559038 1.916553 -1.497659  
C 0.441611 -0.159354 -0.747506  
H 0.484619 -0.560343 -1.765615  
C -0.534471 -0.844119 0.193935  
H -0.534172 -1.938192 0.105864  
C -0.267817 -0.401422 1.580315  
C -0.349254 -1.221121 2.716499  
H -0.558262 -2.282964 2.584055  
C -0.238874 -0.685153 4.000577  
C -0.028348 0.684987 4.174065  
C 0.058119 1.519186 3.058829  
H 0.210173 2.591743 3.184793  
C 6.626112 1.487131 1.340424  
C 6.298869 2.806586 2.050311  
C 7.591803 1.841990 0.187055  
C 7.408682 0.610445 2.340995  
C 5.414130 0.662863 0.765135  
C 5.857966 -0.504211 0.107906  
H 6.931950 -0.627155 0.141817  
C 5.211787 -1.514019 -0.629680  
C 6.218648 -2.540895 -1.253779  
C 5.616499 -3.668121 -2.101660  
C 7.004473 -3.205228 -0.102384  
C 7.225182 -1.801420 -2.156227  
C 3.584586 2.086236 1.574654  
C 3.436998 1.968818 2.979359  
C 2.860295 3.027187 3.681221  
H 2.739507 2.953412 4.762554  
C 2.422552 4.172194 3.022466  
H 1.981977 4.996626 3.588229  
C 2.520744 4.252456 1.637553  
H 2.147074 5.142711 1.132565  
C 3.080214 3.214409 0.884086  
C 3.946095 0.721726 3.674063  
H 4.932208 0.517376 3.235451  
C 3.090072 -0.528040 3.387256  
H 2.395522 -0.683306 4.224079  
H 2.407875 -0.352700 2.535833  
C 3.932558 -1.771614 3.158822  
H 4.641322 -1.926232 3.988594  
H 4.524268 -1.692780 2.232798  
H 3.309913 -2.673595 3.091164  
C 4.159951 0.862088 5.184069  
H 3.203101 1.133076 5.662906  
H 4.400181 -0.140935 5.575686  
C 5.260311 1.827241 5.604687  
H 5.352837 1.870794 6.700891  
H 5.071987 2.850455 5.246618  
H 6.236651 1.515178 5.203006  
C 3.174024 3.304319 -0.630692  
H 2.911372 2.304668 -1.021052

C 2.184319 4.297135 -1.246491  
H 1.167576 4.033701 -0.917817  
H 2.375266 5.309262 -0.855140  
C 2.225283 4.350174 -2.765486  
H 3.205285 4.677531 -3.143569  
H 1.477293 5.058134 -3.149806  
H 2.010163 3.366025 -3.207194  
C 4.614395 3.565497 -1.098644  
H 5.251718 2.799412 -0.645326  
H 4.678953 3.385907 -2.183991  
C 5.147589 4.952798 -0.773195  
H 6.224596 5.024699 -0.989794  
H 5.004494 5.198399 0.291075  
H 4.642669 5.736130 -1.359229  
C 3.126233 -2.349419 -1.622774  
C 2.279995 -3.355700 -1.097926  
C 1.465213 -4.060613 -1.989388  
H 0.824672 -4.858354 -1.613942  
C 1.465332 -3.773345 -3.351525  
H 0.829427 -4.345299 -4.030314  
C 2.263661 -2.743262 -3.845013  
H 2.241680 -2.514703 -4.912096  
C 3.089047 -2.001941 -2.996953  
C 2.315556 -3.679420 0.387112  
H 2.432055 -2.716679 0.919506  
C 1.035280 -4.316733 0.930501  
H 0.195686 -3.641975 0.710845  
H 0.816047 -5.257625 0.400244  
C 1.070411 -4.591143 2.426981  
H 1.799488 -5.371532 2.692625  
H 0.085496 -4.924098 2.781226  
H 1.326605 -3.682152 2.992140  
C 3.565894 -4.500777 0.741878  
H 4.442020 -3.934327 0.407089  
H 3.661505 -4.558457 1.836971  
C 3.591748 -5.901845 0.150147  
H 4.551797 -6.399236 0.356772  
H 3.454371 -5.880954 -0.942575  
H 2.795754 -6.537975 0.567491  
C 3.910746 -0.829647 -3.503137  
C 3.117935 0.489154 -3.383880  
C 4.502741 -1.049623 -4.898694  
H 4.761162 -0.714792 -2.819356  
H 3.824163 1.334102 -3.351940  
C 2.083911 0.714968 -4.474013  
H 2.610467 0.492885 -2.404688  
H 1.401815 1.537447 -4.212877  
H 2.551453 0.966278 -5.438220  
H 1.469411 -0.181963 -4.625533  
C 5.456353 0.055221 -5.334767  
H 3.700139 -1.150143 -5.647203  
H 5.032338 -2.017293 -4.902718  
H 5.921177 -0.179612 -6.304395  
H 4.942709 1.022657 -5.442569  
H 6.267645 0.198235 -4.602995  
H 0.060736 1.107252 5.178247  
H -0.325905 -1.343767 4.868677  
H 7.926748 -2.528684 -2.593716  
H 6.718765 -1.288699 -2.984834  
H 7.816107 -1.054071 -1.610597  
H 7.718956 -3.932209 -0.519104  
H 7.574528 -2.478247 0.490858  
H 6.339620 -3.744552 0.586250

H 6.427325 -4.362814 -2.370772  
H 4.850024 -4.244148 -1.575483  
H 5.171164 -3.303411 -3.033049  
H 7.978987 0.956010 -0.331792  
H 7.114554 2.484451 -0.564541  
H 8.453177 2.392039 0.596563  
H 7.854979 -0.273677 1.866762  
H 8.226538 1.202598 2.780217  
H 6.773918 0.257249 3.164853  
H 5.753167 2.665214 2.986628  
H 7.249586 3.305056 2.295351  
H 5.716709 3.492756 1.428223  
H -7.659382 1.962032 -3.365480  
H -6.492455 0.619802 -3.322492  
H -7.737471 0.759839 -2.066195  
H -6.216351 3.703800 -3.444743  
H -4.733776 3.873467 -2.494362  
H -4.865036 2.584962 -3.693075  
H -7.574398 3.765830 -1.504346  
H -7.472668 2.543670 -0.213155  
H -6.211552 3.784106 -0.362067  
H -7.125614 -2.589547 -0.778082  
H -8.530096 -2.442811 0.297722  
H -8.013423 -1.059532 -0.685038  
H -6.997809 -0.140513 2.822206  
H -7.952459 0.345877 1.411813  
H -8.450385 -1.060309 2.377664  
H -5.973986 -2.546815 2.853196  
H -7.446217 -3.218163 2.140046  
H -5.878476 -3.480557 1.357747

248

(DIPePBDI\*)Mg(naphthalene)Mg(DIPePBDI\*) different ring

Mg -2.959959 0.069898 0.164076  
Mg 2.863429 -0.221599 0.007055  
N -4.548044 -1.271247 0.327264  
N -4.041634 1.393919 -1.028144  
N 3.608305 0.639838 1.769070  
N 4.780377 -0.748202 -0.677101  
C -6.980388 -2.025326 -0.148132  
C -7.367094 -2.338749 -1.611594  
C -8.202532 -1.366966 0.523778  
C -6.752057 -3.378768 0.534046  
C -5.765753 -1.026219 -0.162741  
C -6.087422 0.166041 -0.842650  
H -7.123820 0.208062 -1.149231  
C -5.326561 1.248603 -1.330352  
C -6.162172 2.200557 -2.247565  
C -5.413736 3.348759 -2.936046  
C -7.265407 2.837368 -1.379330  
C -6.812477 1.374642 -3.375818  
C -4.182134 -2.352065 1.171085  
C -3.298474 -3.348779 0.687515  
C -2.872396 -4.340094 1.579504  
H -2.212450 -5.132179 1.226759  
C -3.241497 -4.320965 2.919604  
H -2.878323 -5.095446 3.599174  
C -4.067399 -3.305665 3.393098  
H -4.341303 -3.290363 4.449037  
C -4.563505 -2.319238 2.538605  
C -2.781005 -3.319646 -0.746050  
H -2.437048 -2.282301 -0.927670  
C -1.556439 -4.216093 -0.962829

H -0.811597 -3.991814 -0.185516  
H -1.841031 -5.270731 -0.812899  
C -0.898686 -4.065383 -2.325470  
H -0.043563 -4.750261 -2.418187  
H -0.519768 -3.044080 -2.467613  
H -1.588018 -4.293491 -3.152536  
C -3.882026 -3.596528 -1.781256  
H -4.712614 -2.912630 -1.575945  
H -3.516089 -3.310229 -2.780487  
C -4.376951 -5.035372 -1.810441  
H -3.621150 -5.722147 -2.220844  
H -5.279299 -5.132094 -2.433655  
H -4.629836 -5.394398 -0.799958  
C -5.507011 -1.240629 3.046297  
H -6.259031 -1.096319 2.259206  
C -6.267789 -1.608406 4.325666  
H -5.545767 -1.785880 5.141508  
H -6.836054 -0.717951 4.640789  
C -7.228368 -2.784349 4.211135  
H -6.713697 -3.708774 3.909052  
H -8.013937 -2.586781 3.466052  
H -7.727639 -2.981147 5.172347  
C -4.819205 0.124756 3.216095  
H -4.327052 0.161440 4.203762  
H -4.002565 0.213594 2.488930  
C -5.765649 1.301672 3.030755  
H -5.265009 2.256736 3.245247  
H -6.644257 1.235941 3.691653  
H -6.129153 1.339324 1.991003  
C -3.113925 2.272528 -1.647204  
C -2.852941 3.546040 -1.089678  
C -1.784968 4.285032 -1.605871  
H -1.562276 5.270208 -1.192333  
C -1.014083 3.799387 -2.661368  
H -0.186147 4.394103 -3.051982  
C -1.316976 2.568490 -3.233847  
H -0.732819 2.215523 -4.084549  
C -2.361888 1.779265 -2.740300  
C -3.779496 4.112306 -0.026628  
H -4.749688 3.617576 -0.181980  
C -3.376687 3.738171 1.407149  
H -4.229098 3.948142 2.072819  
H -3.244917 2.647619 1.446385  
C -2.136652 4.434391 1.938557  
H -1.853658 4.034433 2.922674  
H -2.295003 5.517494 2.056924  
H -1.276100 4.296587 1.269143  
C -4.017801 5.617972 -0.202481  
H -3.089262 6.177204 -0.003558  
H -4.254066 5.813122 -1.261981  
C -5.132892 6.168648 0.675616  
H -4.889483 6.097472 1.746747  
H -6.074915 5.619549 0.514945  
H -5.325515 7.229418 0.454033  
C -2.737214 0.458200 -3.388490  
H -3.565829 0.049621 -2.791001  
C -3.304804 0.665206 -4.800971  
H -4.052051 1.472726 -4.763971  
H -2.512584 1.034031 -5.473489  
C -3.948293 -0.587373 -5.380712  
H -3.217626 -1.396489 -5.529928  
H -4.418207 -0.382817 -6.355004  
H -4.729327 -0.976355 -4.706743

C -1.633808 -0.618233 -3.341484  
H -1.130305 -0.568218 -2.361968  
H -2.130681 -1.600115 -3.370588  
C -0.582784 -0.589794 -4.441581  
H -0.007808 0.345549 -4.448776  
H -1.028012 -0.720590 -5.439579  
H 0.143128 -1.401342 -4.292313  
C -0.006933 0.441685 -0.005628  
C 0.923248 0.965623 -0.952794  
H 0.878938 2.034276 -1.161762  
C 1.448021 0.090507 -1.983074  
H 1.796712 0.496035 -2.930592  
C 1.497690 -1.254912 -1.731624  
H 1.901385 -1.943521 -2.470785  
C 1.059057 -1.724094 -0.430377  
H 1.134326 -2.790111 -0.212054  
C 0.055315 -0.974821 0.274858  
C -0.788450 -1.500858 1.278180  
H -0.769429 -2.571712 1.476015  
C -1.472056 -0.652663 2.191555  
C -1.553560 0.705179 1.925857  
C -0.981077 1.206054 0.696980  
H -1.042521 2.271339 0.480085  
C 5.502868 1.170986 3.462633  
C 4.554193 1.936831 4.392711  
C 6.650374 2.147652 3.120847  
C 6.112206 0.009121 4.274476  
C 4.887053 0.591956 2.135061  
C 5.877476 -0.007666 1.328531  
H 6.859033 0.029159 1.779068  
C 5.892502 -0.567154 0.037273  
C 7.356852 -0.916321 -0.423711  
C 7.532204 -1.582685 -1.795171  
C 7.995931 -1.869612 0.610570  
C 8.191706 0.379461 -0.458468  
C 2.540264 1.181615 2.532084  
C 1.945933 0.400952 3.557031  
C 0.875426 0.940623 4.270288  
H 0.403357 0.352957 5.058547  
C 0.412138 2.225865 4.007368  
H -0.405252 2.644946 4.599197  
C 0.974099 2.962836 2.972530  
H 0.587292 3.957849 2.758934  
C 2.014017 2.449326 2.190423  
C 2.527710 -0.959994 3.893360  
H 3.618620 -0.831679 3.862444  
C 2.201496 -2.026989 2.833101  
H 1.316009 -2.597658 3.156692  
H 1.886002 -1.546944 1.896557  
C 3.371435 -2.955858 2.548954  
H 3.743801 -3.438665 3.467232  
H 4.212896 -2.398093 2.105392  
H 3.091838 -3.754864 1.847483  
C 2.184713 -1.486660 5.290240  
H 1.089003 -1.584546 5.383602  
H 2.568634 -2.519182 5.353222  
C 2.744808 -0.683741 6.456668  
H 2.457724 -1.131382 7.420801  
H 2.383530 0.355517 6.452235  
H 3.844482 -0.647983 6.423392  
C 2.572785 3.244950 1.021773  
H 2.801985 2.507040 0.235074  
C 1.550288 4.219093 0.425852

H 0.611023 3.673934 0.249256  
H 1.305516 5.006901 1.156641  
C 1.996714 4.874387 -0.871420  
H 2.907917 5.477911 -0.741558  
H 1.215317 5.542957 -1.262228  
H 2.206315 4.120357 -1.644181  
C 3.907456 3.928134 1.355747  
H 4.591213 3.152012 1.718607  
H 4.363798 4.297944 0.422642  
C 3.816922 5.060397 2.367829  
H 4.818348 5.410167 2.662934  
H 3.292686 4.740696 3.282432  
H 3.272429 5.928805 1.965564  
C 4.747510 -1.142548 -2.036577  
C 4.345367 -2.458554 -2.371758  
C 4.258828 -2.800663 -3.725210  
H 3.966437 -3.813240 -4.006219  
C 4.521882 -1.869520 -4.726316  
H 4.446797 -2.158366 -5.777278  
C 4.869191 -0.566309 -4.382426  
H 5.067150 0.159066 -5.173403  
C 4.985186 -0.176499 -3.044298  
C 3.983500 -3.458983 -1.284494  
H 3.500046 -2.875155 -0.483310  
C 2.968298 -4.509931 -1.750272  
H 2.135173 -3.996532 -2.253995  
H 3.420331 -5.161275 -2.516116  
C 2.413321 -5.381780 -0.632276  
H 3.194128 -5.992577 -0.154375  
H 1.646880 -6.072811 -1.015058  
H 1.942123 -4.773506 0.155456  
C 5.221747 -4.094815 -0.633447  
H 5.854779 -3.279401 -0.263927  
H 4.908325 -4.644293 0.268684  
C 6.028268 -5.012872 -1.539745  
H 6.963187 -5.328240 -1.051532  
H 6.297179 -4.513446 -2.484183  
H 5.471118 -5.926138 -1.800290  
C 5.367373 1.247020 -2.675879  
C 4.133573 2.154738 -2.525330  
C 6.434080 1.839320 -3.606113  
H 5.811704 1.209038 -1.671913  
H 4.446117 3.098707 -2.051401  
C 3.374830 2.449857 -3.809142  
H 3.450205 1.685791 -1.801410  
H 2.451706 3.012012 -3.601012  
H 3.973743 3.050865 -4.511054  
H 3.087681 1.523695 -4.329811  
C 6.950342 3.201241 -3.160646  
H 6.047323 1.921936 -4.634775  
H 7.274224 1.127034 -3.665063  
H 7.788950 3.533159 -3.791579  
H 6.170878 3.976191 -3.218607  
H 7.307994 3.174964 -2.118418  
H -2.005248 1.392756 2.640766  
H -1.925373 -1.081375 3.086754  
H -6.540487 -2.813022 -2.157097  
H -8.217654 -3.037926 -1.619440  
H -7.662627 -1.442841 -2.171509  
H -7.992820 -1.061449 1.557872  
H -8.556424 -0.479438 -0.017663  
H -9.032725 -2.089531 0.552284  
H -6.599649 -3.297084 1.612885



H -7.648855 -3.996871 0.372874  
H -5.897877 -3.921225 0.118346  
H -7.880359 3.512703 -1.994794  
H -7.931000 2.088151 -0.929744  
H -6.830423 3.430715 -0.561072  
H -7.340334 2.048504 -4.068109  
H -6.053464 0.826635 -3.950767  
H -7.543491 0.643961 -3.007245  
H -6.136341 3.892583 -3.564073  
H -4.991714 4.069146 -2.231351  
H -4.602117 3.004392 -3.585738  
H 9.011351 -2.135805 0.278564  
H 8.083411 -1.421838 1.608769  
H 7.423061 -2.801342 0.715201  
H 8.597432 -1.836228 -1.912381  
H 6.959482 -2.507816 -1.902483  
H 7.256202 -0.927254 -2.626818  
H 9.224066 0.142962 -0.760651  
H 7.788530 1.094726 -1.187309  
H 8.231246 0.882362 0.516521  
H 3.773143 1.306066 4.823333  
H 5.148547 2.341558 5.226688  
H 4.062233 2.779298 3.896599  
H 7.473019 1.668847 2.574855  
H 6.300308 2.996055 2.517822  
H 7.067079 2.552758 4.055910  
H 6.926311 -0.494615 3.736239  
H 6.522765 0.398750 5.219248  
H 5.362691 -0.753293 4.526125

254

(<sup>DIPeP</sup>BDI\*)Mg(anthracene)Mg(<sup>DIPeP</sup>BDI\*) same ring

Mg -2.544661 0.226631 -0.018075  
Mg 2.532088 0.089734 -0.197921  
N -4.166564 -0.800596 -0.877027  
N -3.797023 1.491605 1.067600  
N 4.066943 -0.394660 1.144238  
N 3.860210 0.514711 -1.726332  
C -6.688569 -1.312547 -1.185118  
C -7.615324 -0.289878 -1.880199  
C -7.491639 -1.957672 -0.037180  
C -6.401110 -2.404492 -2.222553  
C -5.442655 -0.563949 -0.586338  
C -5.827941 0.465944 0.299484  
H -6.900486 0.544142 0.415544  
C -5.126536 1.464551 1.002035  
C -6.087809 2.499902 1.676857  
C -5.449058 3.735453 2.321577  
C -6.877653 1.765571 2.776125  
C -7.062739 3.048819 0.614641  
C -3.651633 -1.837906 -1.694628  
C -3.114813 -1.519543 -2.967559  
C -2.563703 -2.557255 -3.728582  
H -2.169228 -2.344650 -4.722084  
C -2.508034 -3.860938 -3.245397  
H -2.086198 -4.657546 -3.862607  
C -2.975845 -4.144850 -1.967067  
H -2.895547 -5.160438 -1.580852  
C -3.541749 -3.150311 -1.169212  
C -3.158242 -0.093415 -3.498009  
H -2.859944 0.555246 -2.656592  
C -2.156999 0.158820 -4.628518  
H -1.163356 -0.161583 -4.287529

H -2.399643 -0.481945 -5.491973  
C -2.078798 1.602455 -5.100838  
H -1.341268 1.706667 -5.910948  
H -1.769739 2.273871 -4.287805  
H -3.040854 1.966736 -5.491821  
C -4.581007 0.340221 -3.882209  
H -5.227426 0.159542 -3.017011  
H -4.596768 1.432950 -4.027835  
C -5.146202 -0.352195 -5.113519  
H -4.629840 -0.041847 -6.034998  
H -6.214722 -0.121103 -5.243707  
H -5.048973 -1.446974 -5.037470  
C -4.092569 -3.450288 0.210024  
H -5.081191 -2.972149 0.243003  
C -4.313489 -4.936632 0.506739  
H -3.355930 -5.474488 0.398836  
H -4.567501 -5.023716 1.576458  
C -5.410132 -5.607611 -0.309755  
H -5.213873 -5.553743 -1.391224  
H -6.385771 -5.128805 -0.131257  
H -5.510447 -6.671251 -0.043527  
C -3.281441 -2.815128 1.355053  
H -2.576150 -3.560900 1.748024  
H -2.626638 -2.013968 0.977154  
C -4.177618 -2.286007 2.462085  
H -3.595049 -1.973502 3.336886  
H -4.888485 -3.058412 2.797994  
H -4.766665 -1.421918 2.114806  
C -3.001458 2.503946 1.661870  
C -2.556614 2.383092 3.000535  
C -1.633397 3.324459 3.470464  
H -1.290704 3.269045 4.505236  
C -1.172369 4.358411 2.659307  
H -0.461015 5.086381 3.051454  
C -1.658767 4.493669 1.362119  
H -1.337737 5.342085 0.755066  
C -2.583912 3.582888 0.845483  
C -3.170346 1.353543 3.937115  
H -4.033361 0.931770 3.400144  
C -2.268814 0.147687 4.252422  
H -2.895865 -0.623858 4.726100  
H -1.932214 -0.287220 3.301081  
C -1.072863 0.414011 5.151771  
H -0.468594 -0.497350 5.268923  
H -1.376691 0.741648 6.158386  
H -0.409118 1.187239 4.740880  
C -3.712642 2.016649 5.215742  
H -2.884057 2.461013 5.790958  
H -4.352607 2.866168 4.929410  
C -4.502679 1.076137 6.115926  
H -3.869408 0.288444 6.551197  
H -5.311814 0.574650 5.560420  
H -4.964126 1.624202 6.951672  
C -3.211174 3.773854 -0.523924  
H -4.159898 3.217920 -0.510574  
C -3.573962 5.236808 -0.809490  
H -4.139449 5.628154 0.052490  
H -2.664265 5.855899 -0.869258  
C -4.393080 5.419226 -2.079959  
H -3.824741 5.140131 -2.980524  
H -4.709726 6.466119 -2.203302  
H -5.302075 4.796134 -2.060477  
C -2.379420 3.139277 -1.650843

H -2.073294 2.121914 -1.348448  
H -3.022429 2.999810 -2.533399  
C -1.121967 3.896382 -2.028389  
H -0.503703 4.075731 -1.140469  
H -1.345497 4.871262 -2.488918  
H -0.510331 3.325017 -2.740735  
C -0.083689 -1.088682 1.305461  
C -0.050482 0.290773 1.762007  
H 0.002504 0.469359 2.831830  
C 0.366718 1.282667 0.882116  
H 0.641391 2.269215 1.269750  
C 0.421549 1.008759 -0.512557  
H 0.535666 1.854649 -1.195587  
C -0.500229 -0.105392 -0.923147  
H -0.513955 -0.305437 -2.000444  
C -0.251438 -1.315738 -0.120223  
C -0.287295 -2.613593 -0.600752  
H -0.459601 -2.784410 -1.663516  
C -0.177122 -3.732174 0.264186  
C -0.010077 -3.508780 1.670577  
C 0.032078 -2.178062 2.154428  
H 0.163465 -2.008293 3.223549  
C 6.565296 -0.779050 1.755998  
C 6.232438 -1.136817 3.209891  
C 7.544529 0.415724 1.816981  
C 7.338529 -1.972664 1.155821  
C 5.359793 -0.412434 0.810454  
C 5.814641 -0.063315 -0.478719  
H 6.888480 -0.137329 -0.581958  
C 5.183931 0.410261 -1.643820  
C 6.206050 0.750165 -2.783601  
C 5.621375 1.298247 -4.091184  
C 6.987382 -0.534848 -3.134803  
C 7.217534 1.798319 -2.279910  
C 3.521445 -0.827818 2.383675  
C 3.370321 -2.215623 2.629058  
C 2.794023 -2.620518 3.833034  
H 2.675067 -3.684328 4.038286  
C 2.357343 -1.688747 4.769767  
H 1.917203 -2.023102 5.712356  
C 2.460102 -0.329329 4.493468  
H 2.092563 0.388319 5.226212  
C 3.022588 0.131247 3.297779  
C 3.880731 -3.212221 1.607502  
H 4.872219 -2.848215 1.306131  
C 3.034035 -3.250686 0.320976  
H 2.342361 -4.101869 0.379742  
H 2.360518 -2.377548 0.267402  
C 3.880279 -3.350037 -0.936578  
H 4.582688 -4.197010 -0.874386  
H 4.477668 -2.437795 -1.094765  
H 3.257185 -3.510156 -1.826740  
C 4.074279 -4.638096 2.132471  
H 3.108486 -5.019552 2.505141  
H 4.312024 -5.275603 1.264204  
C 5.167271 -4.811050 3.178680  
H 5.243374 -5.860594 3.502520  
H 4.983386 -4.200707 4.075684  
H 6.150569 -4.516819 2.779913  
C 3.141748 1.618899 3.004884  
H 2.902836 1.750253 1.934294  
C 2.150727 2.482262 3.790381  
H 1.130445 2.121634 3.591562

H 2.312197 2.349759 4.872142  
C 2.230698 3.966304 3.468406  
H 3.213321 4.393716 3.717741  
H 1.479051 4.528618 4.040231  
H 2.046883 4.156652 2.400618  
C 4.587608 2.114045 3.166789  
H 5.225472 1.472351 2.550676  
H 4.676575 3.118345 2.721983  
C 5.096150 2.137226 4.600401  
H 6.174792 2.354830 4.634689  
H 4.935630 1.168195 5.098939  
H 4.587839 2.903607 5.205659  
C 3.111409 1.178853 -2.723098  
C 2.266269 0.415807 -3.565245  
C 1.449440 1.100310 -4.470447  
H 0.809406 0.535898 -5.148090  
C 1.445146 2.491071 -4.533162  
H 0.805716 3.003286 -5.254832  
C 2.248179 3.228882 -3.666009  
H 2.226832 4.318939 -3.715894  
C 3.079298 2.596048 -2.739016  
C 2.301259 -1.103384 -3.502113  
H 2.383999 -1.376621 -2.432523  
C 1.040265 -1.794941 -4.023903  
H 0.178967 -1.425507 -3.449540  
H 0.849124 -1.511654 -5.071629  
C 1.087074 -3.313001 -3.925439  
H 1.832868 -3.753558 -4.604017  
H 0.110880 -3.746122 -4.180854  
H 1.329137 -3.639116 -2.902542  
C 3.572480 -1.651339 -4.170455  
H 4.433100 -1.176281 -3.687919  
H 3.669064 -2.723158 -3.940136  
C 3.634705 -1.441563 -5.675866  
H 4.611533 -1.752567 -6.076926  
H 3.485422 -0.383260 -5.942795  
H 2.863031 -2.023223 -6.203553  
C 3.915131 3.385091 -1.746328  
C 3.144216 3.614063 -0.430396  
C 4.501789 4.675189 -2.328478  
H 4.767311 2.751289 -1.470842  
H 3.862384 3.824749 0.378153  
C 2.088318 4.704339 -0.490448  
H 2.661099 2.663277 -0.150912  
H 1.427443 4.671916 0.388363  
H 2.536916 5.708695 -0.529043  
H 1.454608 4.588119 -1.379088  
C 5.462577 5.387498 -1.385332  
H 3.696067 5.370533 -2.614512  
H 5.023363 4.426214 -3.268051  
H 5.925627 6.258697 -1.873077  
H 4.955409 5.750428 -0.478438  
H 6.275189 4.719228 -1.057961  
C 0.111281 -4.629212 2.529107  
C -0.202093 -5.063325 -0.216709  
H 7.928560 2.035953 -3.086359  
H 6.718039 2.732880 -1.991844  
H 7.797555 1.448258 -1.415984  
H 7.712555 -0.313734 -3.933373  
H 7.545604 -0.933768 -2.277735  
H 6.322974 -1.331620 -3.495835  
H 6.439906 1.380356 -4.823039  
H 4.853535 0.652627 -4.526505

H 5.183922 2.294833 -3.972465  
H 7.941021 0.692800 0.832090  
H 7.076291 1.309625 2.249375  
H 8.399257 0.145602 2.456104  
H 7.788009 -1.736149 0.182258  
H 8.153399 -2.256910 1.839569  
H 6.697735 -2.853796 1.017750  
H 5.679507 -2.074572 3.304560  
H 7.181612 -1.258593 3.754385  
H 5.656686 -0.359127 3.720327  
H -7.695701 3.828830 1.065529  
H -6.512298 3.504183 -0.222456  
H -7.728949 2.283298 0.197936  
H -6.258677 4.352409 2.741783  
H -4.761665 3.495830 3.135638  
H -4.904347 4.353437 1.599629  
H -7.582086 2.460502 3.259990  
H -7.453468 0.917469 2.381315  
H -6.200965 1.378939 3.551432  
H -7.110500 0.222108 -2.710121  
H -8.486841 -0.819175 -2.295507  
H -7.991393 0.480184 -1.195115  
H -6.891296 -2.681675 0.530404  
H -7.871827 -1.213783 0.675907  
H -8.356687 -2.496089 -0.454947  
H -5.877002 -3.267570 -1.804407  
H -7.364755 -2.763872 -2.615663  
H -5.813928 -2.038456 -3.070788  
C -0.067693 -6.136742 0.643804  
H 0.225891 -4.453782 3.601922  
C 0.086710 -5.917770 2.030400  
H 0.186478 -6.769646 2.707698  
H -0.080129 -7.157250 0.252837  
H -0.317587 -5.225289 -1.290783

254

**(<sup>DIPeP</sup>BDI\*)Mg(naphthalene)Mg(<sup>DIPeP</sup>BDI\*) different ring**

Mg 2.922450 0.116325 -0.264383  
Mg -2.850534 -0.121245 -0.034973  
N 4.341007 -1.417183 -0.090576  
N 4.037152 1.423221 0.922732  
N -3.939088 1.454201 -0.806200  
N -4.457499 -1.420271 0.099627  
C 6.725777 -2.284294 0.434364  
C 7.167515 -2.485093 1.900605  
C 7.938936 -1.747392 -0.352961  
C 6.407536 -3.680715 -0.112746  
C 5.568524 -1.221292 0.387240  
C 5.970204 0.006321 0.957276  
H 7.004475 0.005628 1.273800  
C 5.293005 1.193662 1.296452  
C 6.191778 2.177245 2.113573  
C 5.523655 3.447410 2.647746  
C 7.337239 2.629757 1.186309  
C 6.774993 1.447888 3.339251  
C 3.879564 -2.579596 -0.762525  
C 3.000162 -3.477576 -0.110439  
C 2.534007 -4.580438 -0.835014  
H 1.881577 -5.306739 -0.350570  
C 2.853207 -4.756029 -2.178284  
H 2.466313 -5.619570 -2.724561  
C 3.649260 -3.818201 -2.827835  
H 3.865150 -3.941971 -3.889754

C 4.183712 -2.728793 -2.138138  
C 2.510060 -3.208474 1.305102  
H 2.221910 -2.139882 1.317121  
C 1.250471 -4.006410 1.659276  
H 0.525578 -3.888715 0.841938  
H 1.485511 -5.083212 1.690311  
C 0.586654 -3.601514 2.965896  
H -0.351963 -4.156004 3.112971  
H 0.334710 -2.532382 2.962197  
H 1.228628 -3.794536 3.839174  
C 3.605204 -3.372267 2.370302  
H 4.459889 -2.754020 2.073262  
H 3.250633 -2.934273 3.317683  
C 4.047902 -4.808912 2.607488  
H 3.265291 -5.404217 3.102194  
H 4.942144 -4.849644 3.248459  
H 4.293767 -5.315252 1.660460  
C 5.107299 -1.726877 -2.805739  
H 5.925554 -1.556338 -2.092091  
C 5.756110 -2.213551 -4.104672  
H 4.967629 -2.457661 -4.837286  
H 6.296358 -1.357631 -4.543528  
C 6.724219 -3.379090 -3.952281  
H 6.235737 -4.266787 -3.523025  
H 7.562249 -3.114416 -3.288985  
H 7.151438 -3.671742 -4.923888  
C 4.453161 -0.350797 -3.035545  
H 4.057721 -0.302029 -4.061169  
H 3.536676 -0.253814 -2.433835  
C 5.400226 0.806839 -2.765903  
H 4.944658 1.767489 -3.039283  
H 6.329576 0.703072 -3.348864  
H 5.685933 0.850513 -1.701754  
C 3.177647 2.441362 1.412106  
C 2.990579 3.636715 0.675705  
C 1.992769 4.521979 1.096164  
H 1.831904 5.449863 0.544770  
C 1.228665 4.266804 2.232897  
H 0.463811 4.979695 2.548489  
C 1.467841 3.119847 2.983990  
H 0.900488 2.951795 3.901007  
C 2.430035 2.183620 2.588407  
C 3.941867 4.008926 -0.451642  
H 4.809327 3.338970 -0.347682  
C 3.398583 3.748534 -1.866332  
H 4.231237 3.869895 -2.577487  
H 3.101571 2.692812 -1.939476  
C 2.239769 4.633600 -2.290335  
H 1.947682 4.430824 -3.331542  
H 2.491807 5.703803 -2.231293  
H 1.356692 4.459268 -1.661341  
C 4.461860 5.449360 -0.293796  
H 3.639299 6.167312 -0.441355  
H 4.785678 5.598030 0.748503  
C 5.609269 5.800180 -1.230903  
H 5.299114 5.796397 -2.286819  
H 6.440397 5.083465 -1.129705  
H 6.007157 6.802664 -1.010782  
C 2.721501 0.950874 3.426082  
H 3.568331 0.442909 2.943763  
C 3.191843 1.314264 4.842562  
H 3.987957 2.070748 4.764910  
H 2.377583 1.807135 5.399309

C 3.712740 0.119479 5.630750  
H 2.923050 -0.619518 5.834163  
H 4.130141 0.431040 6.600601  
H 4.509124 -0.402851 5.075683  
C 1.579669 -0.085655 3.430391  
H 1.171051 -0.166677 2.409779  
H 2.022426 -1.068888 3.650866  
C 0.441074 0.157060 4.410039  
H -0.076427 1.106301 4.218108  
H 0.792767 0.168381 5.452799  
H -0.311808 -0.639005 4.326264  
C 0.149072 0.662080 -0.224567  
C -0.559846 1.365548 0.756877  
H -0.464309 2.450270 0.782857  
C -1.312613 0.697250 1.759026  
H -1.746035 1.261626 2.581830  
C -1.430201 -0.694413 1.716575  
H -1.979025 -1.245296 2.480098  
C -0.859909 -1.407459 0.632258  
H -0.979190 -2.486613 0.609488  
C 0.036703 -0.786653 -0.287522  
C 0.803812 -1.457231 -1.268652  
H 0.782206 -2.546669 -1.287174  
C 1.082503 -0.777960 -2.522332  
C 1.247498 -1.435216 -3.751507  
H 1.205165 -2.525551 -3.775440  
C 1.471717 -0.714810 -4.929181  
H 1.598869 -1.247882 -5.875085  
C 1.535603 0.678396 -4.893547  
H 1.704628 1.248284 -5.810662  
C 1.386975 1.350185 -3.672374  
H 1.431393 2.439257 -3.643281  
C 1.174384 0.648171 -2.481839  
C 1.098932 1.256324 -1.144025  
H 1.133860 2.347162 -1.105962  
C -6.036717 2.385443 -1.997111  
C -5.375708 3.752514 -2.212527  
C -7.356816 2.648179 -1.239973  
C -6.398601 1.826404 -3.389092  
C -5.193175 1.307784 -1.228959  
C -5.922767 0.114344 -1.028812  
H -6.925957 0.169845 -1.428429  
C -5.661460 -1.113093 -0.388865  
C -6.925460 -2.044353 -0.364917  
C -6.764054 -3.416850 0.299985  
C -7.373237 -2.302964 -1.820842  
C -8.077399 -1.330180 0.368836  
C -3.093419 2.579810 -1.000927  
C -2.361079 2.678626 -2.209259  
C -1.444123 3.720683 -2.349807  
H -0.863884 3.805401 -3.268892  
C -1.270354 4.661940 -1.338643  
H -0.577928 5.493978 -1.477021  
C -1.968094 4.532746 -0.143537  
H -1.792848 5.256807 0.652336  
C -2.860779 3.475793 0.066703  
C -2.637090 1.686605 -3.321860  
H -3.729591 1.565733 -3.341326  
C -2.059174 0.283103 -3.056139  
H -1.098555 0.184290 -3.579616  
H -1.753184 0.175319 -1.998470  
C -3.002698 -0.830458 -3.475369  
H -3.321778 -0.693425 -4.520611

H -3.915122 -0.852975 -2.856798  
H -2.514434 -1.811220 -3.412074  
C -2.219210 2.153153 -4.719021  
H -1.132291 2.336054 -4.729620  
H -2.364265 1.303470 -5.407129  
C -2.981292 3.357836 -5.253343  
H -2.631079 3.634938 -6.259615  
H -2.863210 4.240483 -4.606558  
H -4.060006 3.147495 -5.325619  
C -3.520849 3.270891 1.418554  
H -3.587665 2.178509 1.559484  
C -2.676028 3.825084 2.572737  
H -1.636641 3.486515 2.440731  
H -2.633047 4.924844 2.516078  
C -3.168821 3.423817 3.955094  
H -4.162685 3.839777 4.179802  
H -2.480883 3.778570 4.737644  
H -3.244202 2.330294 4.050734  
C -4.972689 3.771658 1.453994  
H -5.516242 3.258782 0.651094  
H -5.446314 3.428110 2.388575  
C -5.139953 5.276974 1.312819  
H -6.203261 5.551133 1.234914  
H -4.630798 5.654888 0.412049  
H -4.724620 5.819852 2.176026  
C -4.138827 -2.518051 0.937855  
C -3.310695 -3.557024 0.439996  
C -2.910117 -4.566915 1.321343  
H -2.279904 -5.378083 0.956246  
C -3.292762 -4.556634 2.659070  
H -2.970666 -5.357944 3.327974  
C -4.080666 -3.516662 3.142284  
H -4.371215 -3.513066 4.193853  
C -4.509574 -2.480871 2.306084  
C -2.866164 -3.573193 -1.014437  
H -2.600775 -2.531037 -1.269439  
C -1.612042 -4.414842 -1.271328  
H -0.831955 -4.124065 -0.552182  
H -1.818462 -5.478015 -1.066093  
C -1.056281 -4.273757 -2.679947  
H -1.730832 -4.697156 -3.439677  
H -0.088896 -4.788707 -2.769763  
H -0.882427 -3.217390 -2.931701  
C -4.013751 -3.959522 -1.960353  
H -4.847254 -3.274582 -1.768338  
H -3.707217 -3.756349 -2.997998  
C -4.479874 -5.402801 -1.838454  
H -5.392372 -5.573780 -2.429915  
H -4.704459 -5.668765 -0.793139  
H -3.718590 -6.111282 -2.199252  
C -5.345240 -1.339045 2.860733  
C -4.467287 -0.190940 3.390635  
C -6.393094 -1.806846 3.880251  
H -5.899692 -0.903687 2.018691  
H -5.114942 0.673176 3.609109  
C -3.621697 -0.520917 4.610616  
H -3.817589 0.145243 2.568756  
H -2.977191 0.326081 4.888767  
H -4.244651 -0.757602 5.487234  
H -2.966005 -1.385991 4.430924  
C -7.338596 -0.706493 4.343897  
H -5.903437 -2.250323 4.762010  
H -6.974996 -2.625993 3.425503

H -8.140704 -1.115885 4.976556  
H -6.818140 0.062808 4.934285  
H -7.815637 -0.197206 3.490868  
H 6.283986 4.028482 3.192609  
H 5.132050 4.085419 1.853665  
H 4.701769 3.240846 3.340611  
H 7.996697 3.331196 1.721496  
H 7.949589 1.788689 0.834053  
H 6.941005 3.148682 0.300715  
H 7.351732 2.158829 3.951091  
H 5.973932 1.034344 3.967726  
H 7.447657 0.623274 3.071184  
H 6.215968 -3.687107 -1.189168  
H 7.281618 -4.324685 0.071468  
H 5.546096 -4.141404 0.380462  
H 6.351454 -2.883499 2.517750  
H 7.994807 -3.211030 1.932376  
H 7.517801 -1.557777 2.370856  
H 7.684017 -1.527780 -1.398887  
H 8.354541 -0.830269 0.085502  
H 8.736035 -2.507082 -0.355982  
H -8.966859 -1.979279 0.371455  
H -7.817340 -1.120012 1.414688  
H -8.356213 -0.379488 -0.104041  
H -8.249135 -2.969935 -1.817844  
H -7.659578 -1.382525 -2.345980  
H -6.583912 -2.788932 -2.410478  
H -7.695901 -3.981941 0.143455  
H -5.946251 -4.006974 -0.122250  
H -6.597951 -3.348487 1.379480  
H -7.993451 1.756966 -1.168360  
H -7.178329 3.011897 -0.219005  
H -7.930609 3.420675 -1.774597  
H -7.004380 0.912461 -3.328797  
H -6.977611 2.579695 -3.945673  
H -5.502861 1.591357 -3.980149  
H -4.493161 3.704599 -2.856284  
H -6.108101 4.409652 -2.706446  
H -5.077730 4.234019 -1.275885

206

**(DIPePBDI)Ca(C<sub>6</sub>H<sub>6</sub>)Ca(DIPePBDI)**  
N -3.608388 1.855483 -0.630267  
N 4.089402 1.160405 0.367607  
C -4.924761 1.929434 -0.527358  
C -5.634827 3.235798 -0.801454  
C -2.820346 2.948760 -1.045294  
C -2.268128 2.911832 -2.354960  
C -1.405252 3.934799 -2.751132  
H -0.982285 3.928879 -3.756105  
C -1.049418 4.957610 -1.872691  
H -0.360668 5.741561 -2.195458  
C -1.562946 4.963853 -0.582499  
H -1.268880 5.757205 0.109287  
C -2.452955 3.973181 -0.146908  
C -2.600737 1.744582 -3.268874  
H -2.522286 0.827036 -2.652640  
C -1.587913 1.569338 -4.402783  
H -1.662720 2.426254 -5.094486  
H -0.576270 1.613097 -3.972816  
C -4.062919 1.790661 -3.777297  
H -4.060386 2.148639 -4.821943  
C -4.801799 0.463697 -3.670902

C -2.970143 4.025695 1.278125  
H -3.693144 3.204702 1.404400  
C -1.800941 3.758750 2.245957  
H -1.459563 2.724941 2.070333  
H -0.951917 4.400667 1.956314  
C -3.718850 5.351976 1.536955  
H -4.129606 5.707568 0.578304  
C -4.859438 5.260378 2.544120  
C 5.389810 0.932426 0.471210  
C 6.346150 2.099335 0.570565  
C 3.559379 2.462631 0.291059  
C 2.874880 3.000268 1.409624  
C 2.243482 4.241085 1.271690  
H 1.718021 4.675079 2.123340  
C 2.265135 4.934447 0.065341  
H 1.759887 5.898698 -0.021150  
C 2.925776 4.390294 -1.032810  
H 2.933573 4.938124 -1.976948  
C 3.573537 3.155022 -0.946783  
C 2.827028 2.228072 2.716077  
H 2.714411 1.164088 2.444053  
C 1.611560 2.593198 3.576447  
H 1.723915 3.611504 3.984669  
H 0.726424 2.632439 2.923863  
C 4.157215 2.319574 3.488294  
C 4.589473 3.733139 3.849754  
H 4.075293 1.708224 4.402215  
C 4.232052 2.525376 -2.158275  
H 4.936404 1.767573 -1.788340  
C 3.215588 1.738988 -3.009827  
H 2.660281 1.049737 -2.349296  
C 2.205124 2.570583 -3.780349  
C 5.059786 3.526608 -2.973261  
H 5.728235 4.059246 -2.276083  
C 5.883317 2.881489 -4.079696  
Ca -2.114786 0.085976 -0.238599  
Ca 2.253101 -0.216398 -0.094419  
N -4.185664 -0.987078 0.115511  
N 4.023716 -1.723837 0.083802  
C -5.754241 0.842015 -0.171082  
H -6.820640 1.067845 -0.144561  
C -5.421543 -0.496749 0.113457  
C -6.567935 -1.432433 0.409022  
C -3.939998 -2.330854 0.483285  
C -3.745155 -2.653589 1.850743  
C -3.318611 -3.939938 2.188344  
H -3.146593 -4.190090 3.237681  
C -3.116251 -4.911794 1.211526  
H -2.783657 -5.913833 1.492736  
C -3.361150 -4.604160 -0.123022  
H -3.236742 -5.379777 -0.881296  
C -3.774619 -3.324630 -0.511820  
C -3.932558 -1.591680 2.916891  
H -4.611000 -0.827365 2.506059  
C -2.593103 -0.891165 3.186828  
H -1.944040 -1.572131 3.763166  
H -2.060047 -0.753088 2.233456  
C -4.561560 -2.118648 4.211265  
H -3.887198 -2.860153 4.673895  
H -4.613409 -1.286791 4.932343  
C -4.030272 -3.001247 -1.970900  
H -4.663936 -2.101436 -1.988709  
C -2.739889 -2.609370 -2.712044

H -2.302888 -1.715867 -2.231742  
C -1.661803 -3.677083 -2.814448  
C -4.792766 -4.102929 -2.717144  
C -6.174964 -4.392464 -2.151266  
H -4.883400 -3.792873 -3.772655  
C 5.964426 -0.358060 0.476065  
H 7.044096 -0.395818 0.623346  
C 5.317384 -1.601600 0.339612  
C 6.147719 -2.849405 0.508580  
C 3.326427 -2.945393 0.118980  
C 2.959368 -3.581528 -1.091460  
C 2.006700 -4.605936 -1.049821  
H 1.689576 -5.080422 -1.981886  
C 1.468828 -5.042865 0.156582  
H 0.720226 -5.838216 0.169717  
C 1.912534 -4.479851 1.352934  
H 1.525848 -4.865035 2.298469  
C 2.835250 -3.430828 1.361871  
C 3.587635 -3.167808 -2.409371  
H 4.448913 -2.523160 -2.166378  
C 2.614513 -2.318495 -3.238749  
H 1.712771 -2.916242 -3.460715  
H 2.248370 -1.492118 -2.607380  
C 4.112180 -4.374399 -3.201754  
H 3.259423 -5.001519 -3.516551  
H 4.566760 -4.007552 -4.135866  
C 3.312709 -2.805728 2.658767  
H 4.203532 -2.210567 2.415089  
C 2.314329 -1.788160 3.241704  
H 2.021544 -1.081093 2.446854  
C 1.056341 -2.360659 3.873718  
C 3.761386 -3.865272 3.674583  
H 4.452745 -4.555672 3.162557  
C 4.441386 -3.281624 4.905566  
H -2.999428 6.128702 1.851618  
H -4.619831 2.551591 -3.213343  
C -1.729934 0.277176 -5.192638  
H -4.201105 -5.033225 -2.736516  
H -3.021580 -2.276704 -3.724694  
C -5.949952 -2.717064 4.038773  
C -2.707745 0.458121 3.873594  
C 5.129323 -5.224930 -2.455558  
C 3.186689 -1.736944 -4.522953  
H 2.905804 -4.487241 3.986039  
C -2.075007 3.950798 3.729932  
H 2.844934 -1.169196 3.982968  
C 1.341365 1.624210 4.717703  
H 4.938835 1.833721 2.886962  
H 4.410468 4.304500 -3.407654  
H 3.767213 1.088687 -3.705808  
H -7.535557 -0.916737 0.384331  
H -6.582941 -2.253110 -0.322798  
H -6.441447 -1.905868 1.392604  
H -6.607176 3.060543 -1.281173  
H -5.825101 3.766905 0.144288  
H -5.032016 3.901643 -1.433065  
H 7.290877 1.802669 1.044330  
H 6.581982 2.480187 -0.436662  
H 5.905782 2.935818 1.129932  
H 7.219897 -2.624027 0.567025  
H 5.855024 -3.380495 1.428156  
H 5.968624 -3.547702 -0.320700  
C 0.166101 1.318961 0.197468

C 0.032625 0.295984 1.192722  
C -0.032480 -1.140428 0.719118  
C -0.005013 -1.413110 -0.639586  
C 0.190254 1.037961 -1.153925  
C 0.063624 -0.385264 -1.626618  
H 0.054589 0.532233 2.252845  
H -0.093853 -1.958278 1.432344  
H -0.032787 -2.457900 -0.956293  
H 0.261691 1.852402 -1.869320  
H 0.091780 -0.620736 -2.687554  
H 0.255310 2.362229 0.507832  
H 1.523094 1.920725 -4.347762  
H 1.592598 3.190526 -3.109258  
H 2.695132 3.239641 -4.504466  
H 6.534414 3.618881 -4.573581  
H 6.527698 2.081096 -3.680442  
H 5.247864 2.433185 -4.859046  
H -5.836595 0.551012 -4.036298  
H -4.309104 -0.330053 -4.250444  
H -4.849585 0.136193 -2.621471  
H -0.929191 0.188259 -5.942960  
H -1.666190 -0.599134 -4.530100  
H -2.688451 0.221204 -5.730218  
H -6.677005 -5.198892 -2.707625  
H -6.117915 -4.698100 -1.095068  
H -6.820156 -3.501161 -2.207217  
H -0.773305 -3.279561 -3.328328  
H -1.340719 -4.028670 -1.822918  
H -2.004731 -4.554193 -3.384823  
H 5.444439 -6.091011 -3.057605  
H 6.034534 -4.643042 -2.219538  
H 4.719124 -5.604794 -1.507366  
H 2.485095 -1.017161 -4.972174  
H 4.131516 -1.203924 -4.328890  
H 3.391470 -2.509301 -5.279506  
H 0.442170 1.916850 5.280876  
H 1.178485 0.604442 4.338588  
H 2.174745 1.579980 5.435062  
H 5.554947 3.728128 4.378632  
H 4.701547 4.359029 2.950467  
H 3.859676 4.232861 4.506281  
H 4.831159 -4.076178 5.560106  
H 5.288609 -2.636017 4.621790  
H 3.751156 -2.670909 5.507868  
H 0.390807 -1.553148 4.213168  
H 0.484332 -2.980782 3.168441  
H 1.287829 -2.983071 4.751750  
H -6.343557 -3.099353 4.993183  
H -6.662444 -1.963771 3.666758  
H -5.941363 -3.551772 3.320948  
H -1.719486 0.922688 4.000754  
H -3.321676 1.144888 3.269791  
H -3.169530 0.385005 4.870125  
H -5.381867 6.225249 2.638523  
H -5.603754 4.511367 2.228359  
H -4.517231 4.969807 3.546281  
H -2.290824 5.001647 3.975366  
H -2.923963 3.343358 4.076561  
H -1.195352 3.654602 4.321149

18

Cylcohexane

C -1.443626 -0.206513 -0.228582

C -0.543018 -1.353383 0.228534  
C 0.900659 -1.146983 -0.228402  
C 1.443708 0.206517 0.228318  
C -0.900717 1.146875 0.228495  
C 0.542948 1.353442 -0.228366  
H 0.941016 -1.198585 -1.332064  
H 1.541834 -1.963500 0.142735  
H 1.508879 0.215798 1.331954  
H 2.471320 0.353554 -0.143098  
H -0.567320 -1.413824 1.332215  
H -0.929652 -2.316991 -0.142286  
H 0.929413 2.316911 0.142993  
H 0.567394 1.414466 -1.332009  
H -1.508148 -0.215718 -1.332260  
H -2.471456 -0.353503 0.142232  
H -1.541802 1.963477 -0.142557  
H -0.941198 1.198183 1.332167

196

**[(<sup>D</sup>IPePBDI)Ca]<sub>2</sub> (IX)**

Ca -2.095588 0.134275 -0.171461  
N -4.220546 -0.584878 -0.854460  
N -2.515969 1.927749 -1.606786  
C -6.179305 -0.744385 -2.356798  
C -4.854633 -0.140051 -1.934951  
C -4.434050 0.936145 -2.746849  
H -5.076192 1.108067 -3.611830  
C -3.446864 1.924603 -2.562352  
C -3.537433 3.101521 -3.510862  
C -4.781182 -1.643761 -0.092652  
C -5.561956 -1.332601 1.051047  
C -6.127174 -2.383901 1.780707  
H -6.757001 -2.164502 2.643150  
C -5.887184 -3.710885 1.439753  
H -6.335445 -4.517660 2.024448  
C -5.056009 -4.004044 0.365635  
H -4.845129 -5.047056 0.127111  
C -4.489426 -2.993122 -0.421949  
C -5.741795 0.107002 1.514055  
H -4.773428 0.611042 1.346445  
C -6.764602 0.895876 0.673991  
H -6.345807 1.057764 -0.329012  
C -6.045861 0.198074 3.019168  
C -5.808817 1.566294 3.640872  
C -3.607952 -3.363026 -1.604183  
H -3.027362 -2.464729 -1.868231  
C -2.586867 -4.452569 -1.235299  
C -1.704434 -4.921369 -2.383640  
H -1.946135 -4.054302 -0.434040  
C -4.420982 -3.708426 -2.868196  
H -3.706934 -3.847212 -3.695786  
C -5.326142 -4.927581 -2.768009  
C -1.804545 3.141508 -1.398739  
C -2.451578 4.199303 -0.716631  
C -1.767817 5.404037 -0.533041  
H -2.257788 6.227979 -0.011760  
C -0.467306 5.568166 -0.999871  
H 0.052822 6.518406 -0.859188  
C 0.177016 4.506658 -1.626468  
H 1.205067 4.639184 -1.964400  
C -0.462520 3.277218 -1.820093  
C 0.264043 2.110789 -2.457995  
H -0.152053 1.197028 -2.002946

C 1.762617 2.116766 -2.132478  
C 2.544902 0.926740 -2.672263  
C -0.029715 1.971062 -3.960581  
H -1.115523 1.844866 -4.082434  
C 0.458241 3.131556 -4.814587  
C -3.827131 3.981102 -0.120581  
H -4.364259 3.264496 -0.759883  
C -3.692362 3.285943 1.246260  
C -2.980644 4.079963 2.327832  
H -4.692276 2.988669 1.589678  
C -4.690404 5.245727 -0.069682  
H -4.661486 5.721354 -1.064678  
C -6.136799 4.976222 0.323599  
Ca 2.054644 -0.157295 0.181239  
N 4.139648 0.597500 0.964072  
N 2.511033 -1.983181 1.558886  
C 5.957946 0.862800 2.616059  
C 4.729085 0.165324 2.072793  
C 4.330663 -0.962571 2.822103  
H 4.938856 -1.137362 3.710783  
C 3.414040 -1.995218 2.539237  
C 3.554939 -3.232308 3.399674  
C 4.714894 1.628186 0.175094  
C 5.538546 1.253053 -0.921865  
C 6.019909 2.251740 -1.773188  
H 6.650888 1.980051 -2.618619  
C 5.686580 3.588217 -1.578899  
H 6.064063 4.353207 -2.261547  
C 4.864096 3.943237 -0.516718  
H 4.596075 4.991576 -0.381065  
C 4.367805 2.988954 0.381884  
C 5.833812 -0.213279 -1.193074  
H 4.906700 -0.745959 -0.923047  
C 6.905814 -0.810204 -0.254466  
H 6.433747 -1.022313 0.715811  
C 6.079872 -0.551998 -2.679468  
H 5.745964 -1.592028 -2.827904  
C 7.496951 -0.459024 -3.237468  
C 3.504181 3.437202 1.549117  
H 2.999979 2.539575 1.942682  
C 2.398705 4.409146 1.107150  
C 1.519598 4.935445 2.232117  
H 1.762899 3.890206 0.375356  
C 4.344376 3.990843 2.720084  
H 3.666115 4.134722 3.576805  
C 5.103036 5.283301 2.453610  
C 1.823334 -3.197882 1.286397  
C 2.468035 -4.192413 0.515748  
C 1.796843 -5.392399 0.262776  
H 2.285828 -6.169840 -0.326645  
C 0.511029 -5.609490 0.747156  
H 0.001080 -6.555536 0.551584  
C -0.132655 -4.605609 1.463794  
H -1.150451 -4.777768 1.814533  
C 0.493797 -3.383650 1.730092  
C -0.239451 -2.269676 2.450890  
H 0.140169 -1.323831 2.029763  
C -1.747240 -2.298008 2.172366  
H -1.886922 -2.342111 1.075113  
C -2.534878 -1.141972 2.771430  
C 0.095415 -2.199435 3.950232  
C -0.328453 -3.419533 4.754024  
C 3.826253 -3.915857 -0.095076

H 4.344095 -3.192522 0.553163  
C 3.653470 -3.203923 -1.450919  
C 2.932585 -3.988505 -2.534124  
C 4.727032 -5.153517 -0.175723  
H 4.696275 -5.664071 0.801583  
C 6.171686 -4.832607 -0.534440  
H 2.252824 3.031612 -2.496529  
H -5.424986 -0.538462 3.553307  
C -8.137000 0.247362 0.569633  
H -0.365099 -1.289736 4.368936  
H 3.094120 -2.268214 -1.273269  
C 8.147164 0.043158 -0.030420  
H 5.400635 0.057822 -3.297431  
H 2.830342 5.265880 0.564575  
H 5.056791 3.218858 3.038174  
I -0.008607 1.609973 1.524185  
I -0.067649 -1.691825 -1.462487  
H -6.085794 1.563205 4.706123  
H -4.749181 1.855002 3.576833  
H -6.399967 2.357369 3.154691  
H -2.899412 3.492439 3.254798  
H -1.959014 4.346557 2.019736  
H -3.518352 5.009351 2.572830  
H -6.744556 5.891829 0.262268  
H -6.595089 4.224142 -0.338722  
H -6.218668 4.599622 1.354874  
H -5.817904 -5.128143 -3.732568  
H -4.765416 -5.834838 -2.492123  
H -6.118167 -4.785974 -2.016891  
H -0.868981 -5.525943 -1.999411  
H -2.257272 -5.537083 -3.110003  
H -1.265326 -4.071265 -2.927399  
H 6.797176 -5.738178 -0.520260  
H 6.259408 -4.391924 -1.539559  
H 6.606197 -4.114066 0.178788  
H 2.847340 -3.390110 -3.453737  
H 3.468450 -4.915674 -2.791405  
H 1.913448 -4.258739 -2.221291  
H -0.030958 -3.321967 5.809327  
H -1.420252 -3.566559 4.734049  
H 0.131953 -4.338837 4.358815  
H -3.575678 -1.172997 2.425521  
H -2.560360 -1.188097 3.869611  
H -2.091863 -0.157235 2.536854  
H -8.815558 0.857899 -0.045717  
H -8.074699 -0.752332 0.113893  
H -8.611739 0.127508 1.556212  
H 0.192163 2.984328 -5.872487  
H 0.014124 4.084353 -4.486009  
H 1.553003 3.247048 -4.765539  
H 3.565429 0.921999 -2.266255  
H 2.049340 -0.039843 -2.469465  
H 2.643262 0.966838 -3.766306  
H 7.498820 -0.733778 -4.303751  
H 7.933936 0.547153 -3.159417  
H 8.180707 -1.152102 -2.725155  
H 8.830724 -0.443846 0.682455  
H 8.709453 0.220416 -0.957544  
H 7.883421 1.029295 0.378301  
H 7.193408 -1.797609 -0.653621  
H 4.643777 -2.890088 -1.812480  
H 4.324876 -5.879540 -0.901335  
H -5.022204 -2.834255 -3.149552

H -3.093484 -5.329336 -0.800560  
H -7.089574 -0.107344 3.202615  
H -6.864202 1.904238 1.107059  
H 1.178758 -2.040947 4.051002  
H -2.202310 -3.234633 2.527992  
H -4.258504 5.985005 0.624757  
H -3.141863 2.341971 1.088428  
H 0.409443 1.024538 -4.316197  
H 1.865302 2.199693 -1.032623  
H 6.791192 0.152437 2.712182  
H 6.280307 1.695097 1.980841  
H 5.746777 1.248712 3.624415  
H 4.071578 -3.003254 4.340256  
H 2.584082 -3.695623 3.618021  
H 4.148056 -3.990484 2.863078  
H -6.986437 -0.016965 -2.182582  
H -6.173800 -0.962880 -3.433859  
H -6.423472 -1.659416 -1.806031  
H -4.070724 2.825436 -4.429363  
H -4.089091 3.928069 -3.034963  
H -2.546093 3.496688 -3.768225  
H 5.615008 5.626479 3.366069  
H 5.870711 5.152561 1.676090  
H 4.434357 6.096184 2.129176  
H 0.638560 5.447491 1.816565  
H 1.150033 4.117450 2.869150  
H 2.050752 5.651954 2.877730

98

(DIPEPBDI)CaI

Ca 0.121167 0.154140 -0.633706  
N -1.328726 0.499963 1.110626  
N 1.507642 0.428306 1.174965  
C -2.418077 0.850660 3.287527  
C -1.199980 0.730265 2.404356  
C 0.055344 0.882366 3.033250  
H 0.032164 1.100733 4.101540  
C 1.328965 0.739604 2.451184  
C 2.534605 0.931158 3.340245  
C -2.524742 0.183901 0.439725  
C -3.069133 1.144377 -0.456589  
C -4.125129 0.762160 -1.287606  
H -4.551643 1.482295 -1.985255  
C -4.628126 -0.535033 -1.260201  
H -5.441453 -0.819844 -1.931149  
C -4.070653 -1.476594 -0.401521  
H -4.440163 -2.502590 -0.425537  
C -3.019159 -1.147680 0.460078  
C -2.472820 2.540069 -0.491039  
H -1.384572 2.399455 -0.365249  
C -2.868738 3.381610 0.743632  
H -2.254948 3.045715 1.592853  
C -2.620742 3.289301 -1.829493  
H -1.773325 3.993506 -1.895003  
C -3.892859 4.093410 -2.079551  
C -2.377405 -2.201125 1.340486  
H -1.467890 -1.748324 1.765455  
C -1.907782 -3.410244 0.515752  
C -1.122602 -4.433359 1.322988  
H -1.287658 -3.038275 -0.318496  
C -3.250787 -2.581634 2.555643  
H -2.617430 -3.144698 3.261192  
C -4.513562 -3.382903 2.270498



C 2.766388 0.448669 0.551124  
C 3.347847 1.693514 0.185513  
C 4.552872 1.680123 -0.519621  
H 5.022590 2.619915 -0.811708  
C 5.162548 0.481093 -0.884598  
H 6.106843 0.494073 -1.433589  
C 4.547987 -0.728948 -0.585175  
H 5.012838 -1.659314 -0.912428  
C 3.338010 -0.773049 0.116560  
C 2.639687 -2.091183 0.403885  
H 1.551345 -1.916601 0.292704  
C 2.995749 -3.184788 -0.610128  
H 2.960946 -2.740104 -1.617517  
C 2.055641 -4.379413 -0.579932  
C 2.823617 -2.530091 1.869354  
C 4.272057 -2.690482 2.307576  
C 2.602281 2.991539 0.461586  
H 2.299473 2.992738 1.521214  
C 1.279103 3.052335 -0.338166  
C 1.373724 2.628778 -1.800825  
C 3.457365 4.247509 0.256346  
H 4.435065 4.084568 0.738078  
C 2.838943 5.516908 0.827575  
H 2.281217 -3.477520 2.019159  
H 0.536513 2.450754 0.213807  
C -4.336260 3.320024 1.145959  
H -2.469652 2.567517 -2.650532  
H -2.767967 -3.901798 0.032221  
H -3.527885 -1.656583 3.082897  
I 0.121909 -1.593381 -2.938781  
H 3.517169 6.374667 0.704662  
H 1.890971 5.782628 0.334877  
H 2.630989 5.408169 1.904318  
H 0.393871 2.667835 -2.305590  
H 2.043526 3.289829 -2.370253  
H 1.803879 1.619120 -1.940481  
H 4.332483 -3.000076 3.362239  
H 4.799083 -3.452253 1.712154  
H 4.831044 -1.747482 2.200969  
H 2.342965 -5.120521 -1.340756  
H 2.053534 -4.891085 0.394703  
H 1.026261 -4.062388 -0.805961  
H -3.855211 4.558906 -3.076396  
H -4.806729 3.483766 -2.037778  
H -4.007922 4.905946 -1.346736  
H -4.517218 3.927104 2.046375  
H -5.005847 3.688828 0.356605  
H -4.641680 2.287180 1.370552  
H -2.566751 4.427256 0.559123  
H 0.872195 4.073421 -0.288305  
H 3.671291 4.390288 -0.817110  
H 2.316885 -1.797677 2.515434  
H 4.033499 -3.524113 -0.451517  
H -2.416418 1.822685 3.803494  
H -3.347878 0.757730 2.712979  
H -2.405158 0.073430 4.065828  
H 2.245774 1.063647 4.390137  
H 3.208828 0.065618 3.261102  
H 3.122769 1.807013 3.027673  
H -5.014071 -3.659144 3.211454  
H -5.237665 -2.808715 1.673941  
H -4.297940 -4.317512 1.729529  
H -0.730828 -5.230401 0.674536

H -0.261993 -3.964833 1.827555  
H -1.740105 -4.913043 2.097980

116

(DIPePBDI)CaI + Cyclohexane

Ca -0.228844 -0.351555 0.248706  
N 1.038115 0.256198 -1.584213  
N -1.774250 0.744872 -1.057533  
C 1.736057 0.828029 -3.884227  
C 0.701578 0.708710 -2.785368  
C -0.601565 1.117571 -3.129495  
H -0.728868 1.476789 -4.151778  
C -1.733175 1.213963 -2.298903  
C -2.929059 1.940265 -2.869794  
C 2.380663 0.002457 -1.234205  
C 3.161274 1.054245 -0.688594  
C 4.481254 0.775255 -0.322760  
H 5.107351 1.570483 0.081842  
C 5.005834 -0.508948 -0.437888  
H 6.040387 -0.704789 -0.146729  
C 4.199122 -1.550642 -0.886211  
H 4.605145 -2.562137 -0.925397  
C 2.875352 -1.325138 -1.277955  
C 2.532902 2.415356 -0.439711  
H 1.467689 2.200338 -0.250082  
C 2.514036 3.341967 -1.674609  
H 1.691539 3.020415 -2.329747  
C 3.041613 3.114433 0.841307  
H 2.199207 3.705881 1.238307  
C 4.243742 4.048536 0.749683  
C 1.979960 -2.468427 -1.722512  
H 0.942297 -2.188511 -1.459832  
C 2.268445 -3.773649 -0.969589  
C 1.263912 -4.881061 -1.252943  
H 2.259406 -3.550145 0.109946  
C 1.969297 -2.636335 -3.253700  
H 1.236314 -3.417773 -3.510050  
C 3.318303 -2.970251 -3.872814  
C -2.887978 0.980808 -0.222785  
C -3.034639 2.240974 0.410404  
C -4.103801 2.425656 1.291492  
H -4.243543 3.394366 1.774962  
C -4.993917 1.390437 1.565394  
H -5.821750 1.550229 2.260202  
C -4.826110 0.150057 0.956865  
H -5.527929 -0.653203 1.183091  
C -3.782822 -0.083518 0.054016  
C -3.635485 -1.416843 -0.658814  
H -2.552736 -1.622506 -0.747060  
C -4.225028 -2.591852 0.128835  
H -3.829615 -2.542393 1.155974  
C -3.892204 -3.954629 -0.461781  
C -4.157526 -1.341062 -2.107572  
C -5.628843 -0.975667 -2.238041  
C -2.021397 3.340550 0.160231  
H -1.521699 3.117198 -0.792682  
C -0.895819 3.308996 1.211524  
C -1.296052 3.649028 2.637777  
C -2.663122 4.724081 -0.000402  
H -3.482282 4.632888 -0.733056  
C -1.686330 5.799991 -0.455847  
H -3.969754 -2.312009 -2.592995  
H -0.447082 2.300247 1.195466

C 3.802280 3.401537 -2.484127  
H 3.241097 2.342933 1.602172  
H 3.283766 -4.135616 -1.201768  
H 1.578364 -1.712692 -3.700798  
I -0.667153 -2.906724 1.602678  
H -2.206013 6.748025 -0.661649  
H -0.917660 6.008962 0.304211  
H -1.163534 5.498050 -1.378246  
H -0.419096 3.642462 3.301691  
H -1.744697 4.652201 2.703031  
H -2.026571 2.929388 3.036323  
H -5.930151 -0.924650 -3.295674  
H -6.280256 -1.715559 -1.747137  
H -5.843499 0.003140 -1.780512  
H -4.242558 -4.761186 0.199709  
H -4.360367 -4.110809 -1.446069  
H -2.803369 -4.074638 -0.574654  
H 4.463421 4.475581 1.740466  
H 5.158840 3.546914 0.402978  
H 4.054566 4.892127 0.069331  
H 3.685180 4.064779 -3.355266  
H 4.651844 3.776228 -1.896329  
H 4.082789 2.405281 -2.856311  
H 2.230666 4.354180 -1.337003  
H -0.086905 3.979829 0.880250  
H -3.144430 5.042049 0.939028  
H -3.544710 -0.618348 -2.664382  
H -5.320333 -2.488350 0.209405  
H 1.838771 1.872944 -4.210410  
H 2.721005 0.464380 -3.568133  
H 1.412757 0.250885 -4.763129  
H -2.975557 1.823480 -3.960611  
H -3.871454 1.594025 -2.426264  
H -2.847757 3.018711 -2.656457  
H 3.234045 -3.072691 -4.965627  
H 4.061735 -2.184177 -3.667644  
H 3.724055 -3.918191 -3.485948  
H 1.443742 -5.745364 -0.596383  
H 0.236222 -4.535829 -1.059845  
H 1.319807 -5.239557 -2.292465  
C 2.649066 -1.565636 3.491317  
C 2.451798 -0.617005 2.314378  
C 1.319255 0.372020 2.584280  
C 1.521205 1.135290 3.891415  
C 2.857802 -0.803608 4.797811  
C 1.711771 0.171629 5.060665  
H 0.365789 -0.190785 2.678251  
H 1.239888 1.106125 1.758120  
H 2.413222 1.779231 3.794776  
H 0.667325 1.805033 4.075849  
H 3.377054 -0.051422 2.116981  
H 2.265556 -1.202986 1.398508  
H 1.887672 0.737119 5.990162  
H 0.777998 -0.39885 5.212474  
H 1.758336 -2.212219 3.573592  
H 3.501925 -2.2331 3.289954  
H 2.958703 -1.508061 5.639193  
H 3.807707 -0.239782 4.747527

110

(<sup>D</sup>IPePBDI)CaI + C<sub>6</sub>H<sub>6</sub>

Ca 0.054543 -0.939286 0.290371  
N 1.428523 0.623948 -0.745994

N -1.650020 0.170554 -0.833866  
C 2.238386 1.463100 -2.920124  
C 1.171313 0.886649 -2.018071  
C -0.079799 0.650167 -2.646157  
H -0.064389 0.801141 -3.726954  
C -1.371107 0.439311 -2.115189  
C -2.503589 0.564097 -3.112043  
C 2.621238 1.020811 -0.091177  
C 2.636932 2.263168 0.597024  
C 3.764876 2.600925 1.350545  
H 3.792508 3.552956 1.879856  
C 4.849084 1.735436 1.456958  
H 5.718619 2.013702 2.057056  
C 4.814789 0.512033 0.799426  
H 5.662451 -0.166787 0.898168  
C 3.718730 0.127852 0.014114  
C 1.424223 3.172538 0.557369  
H 0.564077 2.484723 0.540147  
C 1.308013 3.980494 -0.755262  
H 0.891763 3.319251 -1.528974  
C 1.246851 4.041940 1.821698  
H 0.164172 4.194128 1.958931  
C 1.895164 5.422621 1.868770  
C 3.754720 -1.202390 -0.717800  
H 2.727194 -1.437213 -1.041973  
C 4.193349 -2.357125 0.199735  
C 4.359479 -3.697689 -0.501108  
H 3.431665 -2.458597 0.991371  
C 4.580210 -1.115656 -2.019664  
H 4.418309 -2.050494 -2.579862  
C 6.074225 -0.871743 -1.859559  
C -2.982199 0.328587 -0.380810  
C -3.556994 1.625527 -0.333583  
C -4.884185 1.767661 0.083522  
H -5.336430 2.760703 0.100122  
C -5.634163 0.669362 0.488920  
H -6.671024 0.795636 0.809012  
C -5.048349 -0.591918 0.493366  
H -5.640313 -1.447157 0.819464  
C -3.729483 -0.791046 0.066707  
C -3.148820 -2.193612 0.030809  
H -2.100286 -2.142768 0.379148  
C -3.840182 -3.158337 1.003308  
H -3.963288 -2.646880 1.973776  
C -3.105503 -4.474188 1.212548  
C -3.074360 -2.743405 -1.405949  
C -4.423183 -2.908651 -2.089632  
C -2.729297 2.858307 -0.633458  
H -1.879218 2.558201 -1.261904  
C -2.090030 3.379849 0.666488  
C -3.037755 3.871198 1.749604  
C -3.489842 3.935472 -1.416305  
H -4.014598 3.448025 -2.255317  
C -2.589412 5.040304 -1.952903  
H -2.529812 -3.699817 -1.385192  
H -1.470666 2.562002 1.064625  
C 2.595564 4.606971 -1.273435  
H 1.576440 3.459327 2.698337  
H 5.133137 -2.102793 0.716256  
H 4.154823 -0.320202 -2.646957  
I 0.556640 -3.778554 -0.158891  
H -3.155265 5.751231 -2.574068  
H -2.119367 5.618298 -1.142311

H -1.778294 4.624387 -2.572283  
H -2.472938 4.237249 2.621516  
H -3.667863 4.704194 1.400163  
H -3.709076 3.072405 2.098662  
H -4.293562 -3.250463 -3.127700  
H -5.057291 -3.651183 -1.580285  
H -4.983399 -1.960355 -2.115423  
H -3.621554 -5.094330 1.961566  
H -3.040236 -5.061295 0.284861  
H -2.070325 -4.311336 1.549321  
H 1.663382 5.915491 2.825707  
H 2.990337 5.393802 1.773460  
H 1.515194 6.075787 1.069235  
H 2.418278 5.129707 -2.226213  
H 3.020342 5.337110 -0.570505  
H 3.367812 3.843680 -1.447987  
H 0.543195 4.762537 -0.612486  
H -1.386861 4.184698 0.404393  
H -4.283505 4.382463 -0.794997  
H -2.438517 -2.068961 -1.998031  
H -4.865616 -3.367033 0.656644  
H 1.876116 2.367288 -3.429216  
H 3.152032 1.708541 -2.366628

H 2.488303 0.729365 -3.701590  
H -2.159454 0.298941 -4.120261  
H -3.353028 -0.075144 -2.838074  
H -2.877078 1.599138 -3.149606  
H 6.577077 -0.900943 -2.838675  
H 6.282211 0.112266 -1.413264  
H 6.551850 -1.634408 -1.224573  
H 4.520243 -4.500401 0.234380  
H 3.458073 -3.958846 -1.074856  
H 5.220775 -3.701323 -1.186782  
H 2.151118 -1.605160 3.194119  
C 1.172640 -1.123831 3.135209  
C 1.083692 0.269417 3.011640  
C -0.174212 0.880924 2.906790  
C -1.340490 0.103695 2.916589  
C 0.006809 -1.903906 3.159364  
C -1.248630 -1.289046 3.049981  
H 1.992641 0.874059 2.969241  
H -0.242660 1.964417 2.806930  
H -2.317955 0.577286 2.800042  
H 0.079789 -2.990354 3.229644  
H -2.154583 -1.897547 3.050091

## 5. References

- [S1] (a) Rigaku Oxford Diffraction, **2019**, *CrysAlisPro Software system*, version 1.171.40.67a, Rigaku Corporation, Oxford, UK (compounds  $(\text{DIPePBDI})\text{Ca}(\mu^6, \mu^6\text{-anthracene})\text{Ca}(\text{DIPePBDI})$  (**7**),  $(\text{DIPePBDI})\text{Ca}(\mu^A, \mu^A\text{-naphthalene})\text{Ca}(\text{DIPePBDI})$  (**6**),  $(\text{DIPePBDI}^*)\text{Mg}(\mu^2, \mu^A\text{-naphthalene})\text{Ca}(\text{DIPePBDI})$  (**4**)).
- (b) Rigaku Oxford Diffraction, **2020**, *CrysAlisPro Software system*, version 1.171.40.84a, Rigaku Corporation, Oxford, UK (compound  $(\text{DIPePBDI}^*)\text{Mg}(\mu^2, \mu^A\text{-anthracene})\text{Ca}(\text{DIPePBDI})$  (**5**)).
- (c) Rigaku Oxford Diffraction, **2022**, *CrysAlisPro Software system*, version 1.171.42.72a, Rigaku Corporation, Oxford, UK (compound  $[(\text{DIPePBDI})\text{Ca}(\text{H})\cdot(\text{THF})]_2\cdot 2\text{Hexane}$  (**2**)).
- [S2] O. V. Dolomanov, L. J. Bourhis, R.J. Gildea, J. A. K. Howard and H. Puschmann, *J. Appl. Cryst.*, 2009, **42**, 339–341.
- [S3] G. M. Sheldrick, *Acta Cryst. A*, 2015, **71**, 3–8.
- [S4] G. M. Sheldrick, *Acta Cryst. C*, 2015, **71**, 3–8.
- [S5] A. Thorn, B. Dittrich and G. M. Sheldrick, *Acta Cryst. A*, 2012, **68**, 448–451.
- [S6] P. van der Sluis and A. L. Spek, *Acta Cryst. A*, 1990, **46**, 194–201.
- [S7] J.-S. Jiang and A. T. Brünger, *J. Molec. Biol.*, 1994, **243**, 100–115.
- [S8] M. J. Frisch, G. W. Trucks, H. B. Schlegel, G. E. Scuseria, M. A. Robb, J. R. Cheeseman, G. Scalmani, V. Barone, G. A. Petersson, H. Nakatsuji, X. Li, M. Caricato, A. V. Marenich, J. Bloino, B. G. Janesko, R. Gomperts, B. Mennucci, H. P. Hratchian, J. V. Ortiz, A. F. Izmaylov, J. L. Sonnenberg, D. Williams-Young, F. Ding, F. Lipparini, F. Egidi, J. Goings, B. Peng, A. Petrone, T. Henderson, D. Ranasinghe, V. G. Zakrzewski, J. Gao, N. Rega, G. Zheng, W. Liang, M. Hada, M. Ehara, K. Toyota, R. Fukuda, J. Hasegawa, M. Ishida, T. Nakajima, Y. Honda, O. Kitao, H. Nakai, T. Vreven, K. Throssell, J. A. Montgomery, J. E. Peralta, F. Ogliaro, M. J. Bearpark, J. J. Heyd, E. N. Brothers, K. N. Kudin, V. N. Staroverov, T. A. Keith, R. Kobayashi, J. Normand, K. Raghavachari, A. P. Rendell, J. C. Burant, S. S. Iyengar, J. Tomasi, M. Cossi, J. M. Millam, M. Klene, C. Adamo, R. Cammi, J. W. Ochterski, R. L. Martin, K. Morokuma, O. Farkas, J. B. Foresman and D. J. Fox, *Gaussian 16 Rev. A.03*, Wallingford CT, **2016**.
- [S9] A. D. Becke, *J. Chem. Phys.*, 1993, **98**, 5648–5652.
- [S10] J. P. Perdew, J. A. Chevary, S. H. Vosko, K. A. Jackson, M. R. Pederson, D. J. Singh and C. Fiolhais, *Phys. Rev. B*, 1993, **48**, 4978–4978.
- [S11] F. Weigend, *Phys. Chem. Chem. Phys.*, 2006, **8**, 1057–1065.
- [S12] F. Weigend and R. Ahlrichs, *Phys. Chem. Chem. Phys.*, 2005, **7**, 3297.
- [S13] S. Grimme, S. Ehrlich and L. Goerigk, *J. Comput. Chem.*, 2011, **32**, 1456–1465.
- [S14] E. D. Glendening, J. K. Badenhoop, A. E. Reed, J. E. Carpenter, J. A. Bohmann, C. M. Morales, P. Karafiloglou, C. R. Landis and F. Weinhold, *NBO 7.0*, Theoretical Chemistry Institute, University of Wisconsin, Madison, **2018**.
- [S15] N. J. R. van Eikema Hommes, *Molecule*, Erlangen, **2018**.
- [S16] R. F. W. Bader, *Chem. Rev.*, 1991, **91**, 893–928.
- [S17] T. A. Keith, *AIMAll*, version 17.01.25, TK Gristmill Software, Overland Park KS, USA, **2017**.
